# Supplementary material
Source: Elsevier journal article supplement (https://authors.library.caltech.edu/50565/18/mmc7.xlsx)
Supplement: mmc7 [file mmc7.xlsx]

## Sheet: dataset1
ORF	Name	CGD Description	Median log2 planktonic+Cp vs planktonic
CaalfMp01	COX2	Subunit II of cytochrome c oxidase, which is the terminal member of the mitochondrial inner membrane electron transport chain; one of three mitochondrially-encoded subunits	3.98725
CaalfMp02	NAD6	Subunit 6 of NADH:ubiquinone oxidoreductase (NADH:ubiquinone dehydrogenase), a multisubunit enzyme complex (complex I) of the mitochondrial inner membrane that catalyzes the first step in mitochondrial respiration	2.2685
CaalfMp03	NAD1	Subunit 6 of NADH:ubiquinone oxidoreductase (NADH:ubiquinone dehydrogenase), a multisubunit enzyme complex (complex I) of the mitochondrial inner membrane that catalyzes the first step in mitochondrial respiration	1.7425
CaalfMp05	ATP9	Subunit 9 of the F0 sector of mitochondrial F1F0 ATP synthase, which is a large, evolutionarily conserved enzyme complex required for ATP synthesis	1.4685
CaalfMp06	ATP6	Subunit 6 of the F0 sector of mitochondrial F1F0 ATP synthase, which is a large, evolutionarily conserved enzyme complex required for ATP synthesis	1.42875
CaalfMp07	ATP8	Subunit 8 of the F0 sector of mitochondrial F1F0 ATP synthase, which is a large, evolutionarily conserved enzyme complex required for ATP synthesis	1.20975
CaalfMp09	NAD2	Subunit 2 of NADH:ubiquinone oxidoreductase (NADH:ubiquinone dehydrogenase), a multisubunit enzyme complex (complex I) of the mitochondrial inner membrane that catalyzes the first step in mitochondrial respiration	1.1295
CaalfMp10	NAD3	Subunit 3 of NADH:ubiquinone oxidoreductase (NADH:ubiquinone dehydrogenase), a multisubunit enzyme complex (complex I) of the mitochondrial inner membrane that catalyzes the first step in mitochondrial respiration	1.0865
CaalfMp12	NAD4L	Subunit 4L of NADH:ubiquinone oxidoreductase (NADH:ubiquinone dehydrogenase), a multisubunit enzyme complex (complex I) of the mitochondrial inner membrane that catalyzes the first step in mitochondrial respiration	1.08425
CaalfMp13	NAD5	Subunit 5 of NADH:ubiquinone oxidoreductase (NADH:ubiquinone dehydrogenase), a multisubunit enzyme complex (complex I) of the mitochondrial inner membrane that catalyzes the first step in mitochondrial respiration	1.06975
CaalfMp14	NAD4	Subunit 4 of NADH:ubiquinone oxidoreductase (NADH:ubiquinone dehydrogenase), a multisubunit enzyme complex (complex I) of the mitochondrial inner membrane that catalyzes the first step in mitochondrial respiration	1.0235
CaalfMp15	COX3B	Subunit III of cytochrome c oxidase, which is the terminal member of the mitochondrial inner membrane electron transport chain; identical to Cox3Ap; one of three mitochondrially-encoded subunits	0.9965
orf19.10	ALK8	Alkane-inducible cytochrome P450; catalyzes hydroxylation of lauric acid to hydroxylauric acid; overproduction causes fluconazole resistance in WT and causes multidrug resistance in a cdr1 cdr2 double mutant; rat catheter biofilm repressed	0.95975
orf19.100	orf19.100	Alpha/beta hydrolase and lipase domain protein; Hap43-repressed; Spider and flow model biofilm induced	0.94225
orf19.1002	orf19.1002	Protein of unknown function; Hap43-repressed gene	0.9245
orf19.1005	orf19.1005	Protein with predicted RNI-like domains; rat catheter biofilm induced	0.922
orf19.1007	KCS1	Putative bZIP transcription factor; Spider biofilm induced	0.92175
orf19.1008	orf19.1008	Ortholog of Candida albicans WO-1 : CAWG_01856	0.9055
orf19.1009	orf19.1009	Ortholog of Candida albicans WO-1 : CAWG_01857	0.88075
orf19.101	RIM9	Protein required for alkaline pH response via the Rim101 signaling pathway; ortholog of S. cerevisiae Rim9 and A. nidulans palI; Spider biofilm induced	0.86025
orf19.1010	MNT3	Mannosyltransferase; transcription elevated in cyr1, chk1, nik1, and sln1 homozygous null mutants; fungal-specific (no human or murine homolog)	0.85375
orf19.1011	MNN21	Ortholog(s) have alpha-1,2-mannosyltransferase activity, role in cell wall mannoprotein biosynthetic process and Golgi apparatus localization	0.841
orf19.1012	orf19.1012	Ortholog(s) have clathrin binding activity, role in Golgi to vacuole transport, endosomal transport and AP-1 adaptor complex, cytosol, endosome, nucleus localization	0.813
orf19.102	orf19.102	Ortholog(s) have translation regulator activity, role in regulation of translation and mitochondrion localization	0.80125
orf19.1026	orf19.1026	Ortholog(s) have role in exonucleolytic trimming to generate mature 3'-end of 5.8S rRNA from tricistronic rRNA transcript (SSU-rRNA, 5.8S rRNA and LSU-rRNA), more	0.79975
orf19.1027	PDR16	Phosphatidylinositol transfer protein; induction correlates with CDR1, CDR2 overexpression/azole resistance; fluphenazine, 17-beta-estradiol, ethynyl estradiol, NO induced; farnesol-downregulated in biofilm; rat catheter biofilm induced	0.7955
orf19.1028	ELA1	Elongin A; F-box protein; ubiquitin-protein ligase; role in protein ubiquitination and ubiquitin-dependent protein catabolism; rat catheter biofilm induced	0.7885
orf19.1029	RPP1	Putative ortholog of S. cerevisiae Rpp1; subunit of both RNase MRP and nuclear RNase P; rat catheter and Spider biofilm induced	0.787
orf19.103	KAR5	Ortholog of S. cerevisiae Kar5; involved in nuclear membrane fusion during karyogamy; induced by alpha factor	0.78675
orf19.1030	orf19.1030	Putative peptidyl-prolyl cis-trans isomerase	0.7845
orf19.1031	HMG1	HMG-CoA reductase; enzyme of sterol pathway; inhibited by lovastatin; gene not transcriptionally regulated in response to lovastatin and fluconazole	0.78425
orf19.1032	SKO1	bZIP transcription factor; involved in cell wall damage response; represses the yeast-to-hypha transition; mutants are caspofungin sensitive; induced by osmotic stress via Hog1; induced by Mnl1 under weak acid stress	0.775
orf19.1033	STR2	Ortholog(s) have cystathionine gamma-synthase activity, role in transsulfuration and cytosol, nucleus localization	0.7635
orf19.1034	orf19.1034	Protein with a predicted cytochrome b5-like Heme/Steroid binding domain; Hap43, caspofungin repressed; flow model biofilm induced	0.75825
orf19.1035	WAR1	Zn(II)2Cys6 transcription factor; plays a role in resistance to weak organic acids; required for yeast cell adherence to silicone substrate; Spider biofilm induced	0.75375
orf19.1036	MNS1	Alpha-1,2-mannosidase; processes Man9GlcNAc2 to Man8GlcNAc2 isomer B; member of ER localized glycosyl hydrolase family 47; ER form is converted by Kex2 to cytosolic form; flow model biofilm repressed	0.753
orf19.1037	orf19.1037	Protein of unknown function; rat catheter biofilm repressed	0.753
orf19.1039	BET4	Ortholog(s) have Rab geranylgeranyltransferase activity and role in ER to Golgi vesicle-mediated transport, protein geranylgeranylation, protein targeting to membrane	0.749
orf19.104	orf19.104	Protein of unknown function; induced by alpha pheromone in SpiderM medium	0.743
orf19.1040	MAD2	Protein required for the spindle assembly checkpoint of the cell cycle; necessary for survival in host cell macrophages and for virulence in a mouse model of systemic candidiasis	0.73775
orf19.1041	orf19.1041	Ortholog(s) have cyclin-dependent protein serine/threonine kinase activity	0.7355
orf19.1042	POR1	Mitochondrial outer membrane porin; in detergent-resistant membrane fraction (possible lipid raft component); antigenic in human, mouse; Hap43p-induced; flucytosine-, macrophage-, farnesol- induced; fluconazole, caspofungin repressed	0.73175
orf19.1043	orf19.1043	Ortholog(s) have lysophosphatidic acid acyltransferase activity and role in cellular response to cadmium ion, cellular triglyceride homeostasis, detoxification of cadmium ion, lipid particle organization, protein targeting to vacuole	0.727
orf19.1045	orf19.1045	Putative U2 snRNP protein; Hap43p-induced gene; mutation confers hypersensitivity to 5-fluorocytosine (5-FC), 5-fluorouracil (5-FU), and tubercidin (7-deazaadenosine)	0.724
orf19.1047	ERB1	Protein with a predicted role in ribosomal large subunit biogenesis; mutation confers hypersensitivity to 5-fluorocytosine (5-FC), 5-fluorouracil (5-FU), and tubercidin (7-deazaadenosine); hyphal, macrophage repressed	0.7195
orf19.1048	IFD6	Aldo-keto reductase; similar to aryl alcohol dehydrogenases; protein increase correlates with MDR1 overexpression (not CDR1 or CDR2) in fluconazole-resistant clinical isolates; farnesol regulated; possibly essential; Spider biofilm induced	0.71875
orf19.1049	orf19.1049	Predicted NUDIX hydrolase domain; Hap43-induced	0.7175
orf19.105	HAL22	Putative phosphoadenosine-5'-phosphate or 3'-phosphoadenosine 5'-phosphosulfate phosphatase; possible role in sulfur recycling; Hap43-repressed; F-12/CO2 biofilm induced	0.7155
orf19.1050	orf19.1050	Ortholog of S. cerevisiae : YMR087W, C. glabrata CBS138 : CAGL0J01397g, C. dubliniensis CD36 : Cd36_03920, C. parapsilosis CDC317 : CPAR2_107150 and Pichia stipitis Pignal : PICST_61741	0.714
orf19.1051	HTA2	Putative histone H2A; farnesol regulated; rat catheter biofilm repressed; Spider biofilm repressed; Hap43-induced	0.70925
orf19.1052	orf19.1052	Predicted histone H2B; Hap43-induced gene; Spider biofilm repressed	0.70925
orf19.1053	orf19.1053	Ortholog(s) have phosphatidylinositol deacylase activity	0.70825
orf19.1054	orf19.1054	Ortholog(s) have structural constituent of nuclear pore activity	0.7065
orf19.1055	CDC3	Septin; essential for viability; functional homolog of S. cerevisiae Cdc3p; down-regulation associated with azole resistance; macrophage/pseudohyphal-repressed; virulence-group-correlated expression; gene has intron	0.70575
orf19.1057	orf19.1057	Ortholog of C. dubliniensis CD36 : Cd36_03980, C. parapsilosis CDC317 : CPAR2_107050, Candida tenuis NRRL Y-1498 : CANTEDRAFT_113999 and Debaryomyces hansenii CBS767 : DEHA2D12518g	0.7045
orf19.1058	orf19.1058	Ortholog(s) have ubiquitin binding activity, role in ubiquitin-dependent protein catabolic process and proteasome regulatory particle, lid subcomplex, proteasome storage granule localization	0.70175
orf19.1059	HHF1	Putative histone H4; repressed in fkh2 mutant; regulated by Efg1; fluconazole induced; amphotericin B repressed; farnesol regulated; colony morphology-related gene regulation by Ssn6; Hap43-induced; rat catheter and Spider biofilm repressed	0.69975
orf19.1060	orf19.1060	Ortholog of Candida albicans WO-1 : CAWG_00968	0.69075
orf19.1061	HHT21	Putative histone H3; amphotericin B repressed; regulated by Efg1, farnesol; Hap43-induced; rat catheter and Spider biofilm repressed	0.6855
orf19.1062	orf19.1062	Ortholog of C. dubliniensis CD36 : Cd36_04020, C. parapsilosis CDC317 : CPAR2_107000, Candida tenuis NRRL Y-1498 : CANTEDRAFT_113990 and Pichia stipitis Pignal : PICST_32780	0.67075
orf19.1063	orf19.1063	Ortholog(s) have dolichyl-phosphate-mannose-glycolipid alpha-mannosyltransferase activity, role in GPI anchor biosynthetic process and integral to endoplasmic reticulum membrane, mannosyltransferase complex, mitochondrion localization	0.668
orf19.1064	ACS2	Acetyl-CoA synthetase; antigenic during human and murine infection; induced by Efg1; macrophage-induced protein; soluble protein in hyphae; gene contains intron; flow model and Spider biofilm repressed	0.668
orf19.1065	SSA2	HSP70 family chaperone; cell wall fractions; antigenic; beta-defensin peptides impport; ATPase domain binds histatin 5; at hyphal surface, not yeast; farnesol-repressed in biofilm; flow model, Spider biofilm repressed; caspofungin repressed	0.6675
orf19.1066	GIG1	Protein induced by N-acetylglucosamine (GlcNAc); localized in cytoplasm; mutation causes increased resistance to nikkomycin Z	0.664
orf19.1067	GPM2	Putative phosphoglycerate mutase; repressed in hyphae; macrophage/pseudohyphal-repressed; induced by high levels of peroxide stress, farnesol; flow model biofilm induced; rat catheter and Spider biofilm repressed	0.66075
orf19.1069	RPN4	C2H2 transcription factor; putative regulator of proteasome genes; DNA recognition sequence (GAAGGCAAAA) enriched in regions upstream of proteasome genes; induced in core stress response; Hap43-induced; Spider biofilm induced	0.66075
orf19.107	orf19.107	DEAH-box ATP-dependent RNA helicase, required for 18S rRNA synthesis; rat catheter biofilm induced	0.655
orf19.1070	orf19.1070	Ortholog(s) have cytoplasm localization	0.6535
orf19.10708	MTLALPHA2	Homeodomain protein of MTLalpha (Mating Type Like) locus; alpha2p, together with a1p, repress white-opaque switching and mating (an opaque-specific process); a/alpha mating type may increase virulence, provides competitive advantage	0.652
orf19.10709	OBPALPHA	Similar to oxysterol binding protein; non-sex gene located within the MTLalpha mating-type-like locus	0.6515
orf19.10711	PIKALPHA	Putative phosphatidylinositol kinase; non-sex gene located within the MTLalpha mating-type-like locus	0.65075
orf19.10712	MTLALPHA1	Master regulator (activator) of alpha mating type; gene of the MTLalpha (Mating Type Like) locus; ortholog of S. cerevisiae Alpha1p; a/alpha mating type may increase virulence, offers competitive advantage	0.64875
orf19.10713	PAPALPHA	Putative poly(A) polymerase; PAP is inhibited by parnafungin antifungals; non-sex gene located within the MTLalpha mating-type-like locus	0.648
orf19.1075	orf19.1075	Protein of unknown function; Spider biofilm induced	0.6475
orf19.1077	ATM1	Member of MDR subfamily of ABC family; ortholog of S. cerevisiae ABC transporter, Atm1; induced in low iron; induced by nitric oxide independent of Yhb1	0.64425
orf19.1078	HBR2	Putative alanine glyoxylate aminotransferase; regulated by Gcn4p and hemoglobin; stationary phase enriched protein	0.6425
orf19.1080	orf19.1080	Ortholog of C. dubliniensis CD36 : Cd36_64900, C. parapsilosis CDC317 : CPAR2_600390, Pichia stipitis Pignal : PICST_30726 and Candida guilliermondii ATCC 6260 : PGUG_04023	0.64025
orf19.1082	orf19.1082	Protein with an Alba DNA/RNA-binding protein domain; Spider biofilm induced	0.63975
orf19.1082.1	orf19.1082.1	Ortholog(s) have cytochrome-c oxidase activity, role in mitochondrial respiratory chain complex IV assembly and cytosol, mitochondrial intermembrane space, mitochondrial respiratory chain complex IV, nucleus localization	0.62725
orf19.1083	orf19.1083	Putative protein of unknown function; macrophage-induced gene	0.627
orf19.1084	CDC39	Protein similar to S. cerevisiae Cdc39p, which is part of the CCR4-NOT transcription regulatory complex; transposon mutation affects filamentous growth	0.627
orf19.1085	orf19.1085	Ortholog(s) have ubiquitin-protein ligase activity	0.626
orf19.1086	orf19.1086	Ortholog(s) have role in protein deubiquitination, regulation of ER to Golgi vesicle-mediated transport, regulation of retrograde vesicle-mediated transport, Golgi to ER, ribophagy and cytoplasm localization	0.62525
orf19.1087	orf19.1087	Ortholog of C. parapsilosis CDC317 : CPAR2_601130, C. dubliniensis CD36 : Cd36_64620, Lodderomyces elongisporus NRLL YB-4239 : LELG_04885 and Candida orthopsilosis Co 90-125 : CORT_0F02130	0.62375
orf19.1089	PEX11	Putative peroxisomal membrane protein; role in fatty acid oxidation; expression is Tac1-regulated; Hms1p-dependent induction by geldamycin; Spider biofilm induced	0.62325
orf19.109	orf19.109	Probable mitochondrial tyrosyl-tRNA synthetase, based on conservation in other fungi	0.62075
orf19.1090	orf19.1090	Ortholog of C. parapsilosis CDC317 : CPAR2_601110, C. dubliniensis CD36 : Cd36_64660, Candida tenuis NRRL Y-1498 : CANTEDRAFT_119969 and Lodderomyces elongisporus NRLL YB-4239 : LELG_04881	0.615
orf19.1091	NOP8	Ortholog of S. cereviiae Nop8; has a role in ribosomal large subunit biogenesis; rat catheter and Spider biofilm induced	0.6145
orf19.1092	orf19.1092	Dolichol-P-Man dependent alpha(1-3) mannosyltransferase; role in the synthesis of dolichol-linked oligosaccharide donor for N-linked glycosylation of proteins; rat catheter biofilm repressed	0.6105
orf19.1093	FLO8	Transcription factor; required for hyphal formation and CO2 induced white-opaque switching; regulates hyphal gene expression; required for virulence in mouse systemic infection; binds Efg1p; binds Mss11p via LisH motif; has LUFS domain	0.60975
orf19.1095	GLE2	Putative nuclear pore complex; possibly an essential gene, disruptants not obtained by UAU1 method; rat catheter biofilm repressed	0.6055
orf19.1096	orf19.1096	Has domain(s) with predicted voltage-gated chloride channel activity, role in chloride transport, transmembrane transport and membrane localization	0.6035
orf19.1097	ALS2	ALS family protein; role in adhesion, biofilm formation, germ tube induction; expressed at infection of human buccal epithelial cells; putative GPI-anchor; induced by ketoconazole, low iron and at cell wall regeneration; regulated by Sfu1p	0.6
orf19.11	orf19.11	Protein of unknown function; transcript regulated by Mig1 and Tup1; rat catheter biofilm induced	0.598
orf19.1105	orf19.1105	Ortholog of C. parapsilosis CDC317 : CPAR2_302980, C. dubliniensis CD36 : Cd36_53630, Pichia stipitis Pignal : PICST_32155 and Candida orthopsilosis Co 90-125 : CORT_0E05120	0.59725
orf19.1105.2	PGA56	Regulator of sorbose utilization; putative GPI-anchor; hypha and cell wall regeneration induced; colony morphology-related gene regulation by Ssn6; induced by Tbf1, Hap43; Spider biofilm induced	0.597
orf19.1105.3	orf19.1105.3	Protein of unknown function	0.59625
orf19.1106	orf19.1106	Protein with Mob2p-dependent hyphal regulation; fluconazole-induced	0.595
orf19.1107	orf19.1107	Protein of unknown function; Spider biofilm induced	0.589
orf19.1108	HAM1	Putative deoxyribonucleoside triphosphate pyrophosphohydrolase; caspofungin repressed; regulated by Gcn2p and Gcn4p	0.58875
orf19.1109	orf19.1109	Ortholog of C. dubliniensis CD36 : Cd36_53580, C. parapsilosis CDC317 : CPAR2_303030, Debaryomyces hansenii CBS767 : DEHA2G07766g and Pichia stipitis Pignal : psti_CGOB_00176	0.58675
orf19.111	CAN2	Basic amino acid permease; arginine metabolism; regulated by Nrg1/Tup1; caspofungin, flucytosine induced; colony morphology-related regulation by Ssn6; Hap43-repressed; rat catheter and Spider biofilm induced; promoter bound by Efg1	0.58
orf19.1110	orf19.1110	Thiamine pyrophosphokinase, phosphorylates thiamine to produce the coenzyme thiamine pyrophosphate (thiamine diphosphate); active as a homodimer	0.5775
orf19.1111	orf19.1111	Ortholog(s) have chromatin binding, protein complex scaffold activity and role in RNA polymerase II transcriptional preinitiation complex assembly, histone acetylation	0.5765
orf19.1112	BUD7	Ortholog(s) have role in Golgi to plasma membrane transport, fungal-type cell wall chitin biosynthetic process and cell division site, clathrin-coated vesicle, cytosol, exomer complex, nucleus, ribosome localization	0.576
orf19.1113	orf19.1113	Ortholog of C. dubliniensis CD36 : Cd36_53540, Debaryomyces hansenii CBS767 : DEHA2G07854g, Pichia stipitis Pignal : PICST_32162 and Spathaspora passalidarum NRRL Y-27907 : SPAPADRAFT_50795	0.5755
orf19.1114	orf19.1114	Cytochrome c oxidase subunit; membrane-localized protein; rat catheter biofilm induced	0.57475
orf19.1115	GUK1	Putative guanylate kinase; identified in extracts from biofilm and planktonic cells; protein level decrease in stationary phase cultures; Hap43p-induced gene	0.57475
orf19.1116	orf19.1116	Protein of unknown function; planktonic growth-induced gene	0.573
orf19.1117	orf19.1117	Protein similar to Candida boidinii formate dehydrogenase; virulence-group-correlated expression; Hap43-repressed; Spider biofilm repressed	0.57225
orf19.1119	MTR10	Putative importin; member of a family of fungal-specific nuclear importins; Mig1-regulated	0.56975
orf19.1120	FAV2	Adhesin-like protein; induced by mating factor in MTLa/a opaque cells, in cyr1 null, in filaments; regulated by Nrg1, Rfg1, Tup1, Tec1, Efg1, Ntd80, Rob1, Brg1; induced in oralpharyngeal candidasis; Spider biofilm induced	0.5695
orf19.1121	orf19.1121	Has domain(s) with predicted hydrolase activity	0.567
orf19.1122	orf19.1122	Protein of unknown function; induced by alpha pheromone in SpiderM medium; Spider biofilm induced	0.56675
orf19.1123	orf19.1123	Dubious open reading frame	0.5635
orf19.1124	orf19.1124	Protein of unknown function; flow model biofilm induced; Spider biofilm induced	0.56325
orf19.1124.2	orf19.1124.2	Ortholog(s) have diphthine synthase activity, role in peptidyl-diphthamide biosynthetic process from peptidyl-histidine and cytosol, nucleus localization	0.563
orf19.113	CIP1	Possible oxidoreductase; transcript induced by cadmium but not other heavy metals, heat shock, yeast-hypha switch, oxidative stress (via Cap1), or macrophage interaction; stationary phase enriched protein; Spider biofilm induced	0.55925
orf19.1133	MSB1	Putative regulator of transcription; expression in S. cerevisiae flo8 and flo11 mutants suggests a role in regulation of adhesion factors	0.55775
orf19.1135	CAS1	Putative transcription factor with Ku70/Ku80 beta-barrel DNA-binding motif; involved in telomerase regulation and telomere protection; mutation causes marginal increase in caspofungin sensitivity	0.55475
orf19.1136	orf19.1136	Ortholog(s) have AP-2 adaptor complex, cytosol, nucleus localization	0.5545
orf19.1137	orf19.1137	Ortholog(s) have thymidylate kinase activity, uridylate kinase activity, role in dTDP biosynthetic process, dTTP biosynthetic process, dUDP biosynthetic process and cytosol, nucleus localization	0.55425
orf19.1139	orf19.1139	Protein of unknown funtion; S. cerevisiae ortholog Svl3 plays a role in endocytosis and is localized to the bud neck; Spider biofilm induced	0.5535
orf19.114	orf19.114	Ortholog of C. dubliniensis CD36 : Cd36_61190, C. parapsilosis CDC317 : CPAR2_603230, Candida tenuis NRRL Y-1498 : cten_CGOB_00054 and Debaryomyces hansenii CBS767 : DEHA2E21142g	0.55075
orf19.1140	orf19.1140	Protein of unknown function; Spider biofilm repressed	0.5505
orf19.1142	AVT4	Putative vacuolar transporter of large neutral amino acids; induced by alpha pheromone in SpiderM medium	0.54975
orf19.1143	orf19.1143	Ortholog of Pichia stipitis Pignal : PICST_30878, Spathaspora passalidarum NRRL Y-27907 : SPAPADRAFT_60017, Candida guilliermondii ATCC 6260 : PGUG_05223 and Candida tropicalis MYA-3404 : CTRG_01052	0.54975
orf19.1144	orf19.1144	Protein with SEL-1 like protein domain; early-stage flow model biofilm induced	0.54925
orf19.1146	orf19.1146	Ortholog of Candida albicans WO-1 : CAWG_00265	0.549
orf19.1148	orf19.1148	Ortholog of C. dubliniensis CD36 : Cd36_11020 and Candida albicans WO-1 : CAWG_00266	0.54875
orf19.1149	MRF1	Putative mitochondrial respiratory protein; induced by farnesol, benomyl, nitric oxide, core stress response; oxidative stress-induced via Cap1; stationary-phase enriched protein; Spider biofilm induced	0.5485
orf19.115	orf19.115	Ortholog of Candida tropicalis MYA-3404 : CTRG_02973 and Candida albicans WO-1 : CAWG_05252	0.5485
orf19.1150	orf19.1150	GATA-like transcription factor; oral infection induced; mutant has reduced capacity to damage oral epithelial cells; regulated by Gcn2 and Gcn4; Spider biofilm induced	0.5475
orf19.1150.1	orf19.1150.1	Ortholog of C. dubliniensis CD36 : Cd36_10990, C. parapsilosis CDC317 : CPAR2_804585, Candida tenuis NRRL Y-1498 : cten_CGOB_00256 and Debaryomyces hansenii CBS767 : DEHA2F10406g	0.5465
orf19.1152	orf19.1152	Protein of unknown function; induced in core stress response; Gcn2 and Gcn4 regulated; flow model biofilm induced; Spider biofilm induced	0.54375
orf19.1153	GAD1	Putative glutamate decarboxylase; alkaline, macrophage-downregulated gene; amphotericin B induced; induced by Mnl1 under weak acid stress; stationary phase enriched protein; rat catheter biofilm repressed	0.54325
orf19.1154	EGD1	Putative GAL4 DNA-binding enhancer protein; soluble protein in hyphae; biofilm induced; macrophage/pseudohyphal-induced; equal level of protein in exponential and stationary growth phase yeast cultures; Spider biofilm repressed	0.5415
orf19.1155	DPP2	Protein similar to S. cerevisiae pyrophosphate phosphatase Lpp1p; possible role in farnesol biosynthesis	0.5415
orf19.1156	FUS1	Membrane protein required for mating; ortholog of S. cerevisiae Fus1; transcript induced by Cph1 in cells homozygous for the MTLa locus; alpha factor induced	0.54075
orf19.1158	orf19.1158	Ortholog of S. cerevisiae Yft2 required for normal ER membrane biosynthesis; Hap43-repressed gene	0.5385
orf19.1159	orf19.1159	Protein similar to A. nidulans CysA serine O-trans-acetylase; suggests that C. albicans uses an O-acetyl-serine (OAS) pathway of sulfur assimilation; F-12/CO2 early biofilm induced; Spider biofilm induced	0.53775
orf19.1160	orf19.1160	Ortholog(s) have COPII adaptor activity and role in ER to Golgi vesicle-mediated transport, fungal-type cell wall organization, protein glycosylation, protein retention in Golgi apparatus	0.5375
orf19.1161	PLD1	Phospholipase D1; required for phosphatidic acid and for most diacylglycerol production; required for wild-type mouse virulence, but not rat oral virulence; mutant defect in hyphal growth on solid substrates; similar to S. cerevisiae Spo14p	0.53525
orf19.1162	orf19.1162	Protein of unknown function; transcript upregulated by benomyl treatment	0.5335
orf19.1162.1	orf19.1162.1	Ortholog(s) have Golgi apparatus localization	0.53225
orf19.1163	orf19.1163	Has domain(s) with predicted GTP binding activity	0.5315
orf19.1164	GAR1	Putative H/ACA snoRNP pseudouridylase complex protein; mutation confers hypersensitivity to tubercidin (7-deazaadenosine); macrophage/pseudohyphal-induced; Spider biofilm repressed	0.53025
orf19.1166	CTA3	Protein similar to S. cerevisiae Ede1p, which is involved in endocytosis; activates transcription in 1-hybrid assay in S. cerevisiae	0.5275
orf19.1167	orf19.1167	Ortholog(s) have sulfonate dioxygenase activity and role in sulfur compound catabolic process	0.527
orf19.1168	ZCF3	Zn(II)2Cys6 domain transcription factor; required for filamentous growth, resistance to rapamycin and flucytosine; possibly an essential gene, disruptants not obtained by UAU1 method; Hap43-repressed; Spider and flow model biofilm induced	0.5255
orf19.1169	orf19.1169	Putative DnaJ-like molecular chaperone; Spider biofilm induced	0.524
orf19.117	orf19.117	Ortholog(s) have SNAP receptor activity, role in exocytosis, vesicle fusion and SNARE complex, extrinsic to plasma membrane localization	0.52375
orf19.1170	ARO7	Putative chorismate mutase; fungal-specific (no human or murine homolog); alkaline upregulated	0.5235
orf19.1171	BTA1	Ortholog of C. dubliniensis CD36 : Cd36_10780, C. parapsilosis CDC317 : CPAR2_208080, Candida tenuis NRRL Y-1498 : CANTEDRAFT_120956 and Debaryomyces hansenii CBS767 : DEHA2F24508g	0.52175
orf19.1177	orf19.1177	Ortholog of S. cerevisiae Rtt106; histone chaperone that regulates chromatin structure in transcribed and silenced chromosomal regions; affects transcriptional elongation; Hap43-repressed; Spider biofilm repressed	0.5215
orf19.1178	orf19.1178	Putative transcription factor with bZIP DNA-binding motif; Hap43p-repressed gene	0.5205
orf19.1179	orf19.1179	Protein of unknown function; induced in high iron; possibly subject to Kex2 processing; Hap43-repressed	0.52
orf19.118	FAD2	Delta-12 fatty acid desaturase, involved in production of linoleic acid, which is a major component of membranes	0.5175
orf19.1180	orf19.1180	Putative 2-aminoadipate transaminase; rat catheter and Spider biofilm repressed	0.5175
orf19.1181	orf19.1181	Has domain(s) with predicted catalytic activity and membrane localization	0.51725
orf19.1182	orf19.1182	Ortholog(s) have SNAP receptor activity, phosphatidylinositol-3-phosphate binding activity and role in piecemeal microautophagy of nucleus, vacuole fusion, non-autophagic, vesicle fusion	0.5165
orf19.1183	orf19.1183	Ortholog(s) have fungal-type vacuole localization	0.5165
orf19.1185	orf19.1185	Ortholog(s) have protein homodimerization activity, ubiquitin-protein ligase activity	0.51575
orf19.1186	orf19.1186	Has domain(s) with predicted role in attachment of GPI anchor to protein and GPI-anchor transamidase complex localization	0.514
orf19.1187	CPH2	Myc-bHLH transcription factor; promotes hyphal growth; directly regulates Tec1 to induce hypha-specific genes; probably homodimeric, phosphorylated; required for colonization of the mouse GI tract; rat catheter and Spider biofilm induced	0.51375
orf19.1189	orf19.1189	Protein of unknown function; regulated by yeast-hypha switch; induced by Mnl1 in weak acid stress; 5' UTR intron; repressed by chlamydospore formation in C. albicans and C. dubliniensis; rat catheter, Spider and flow model biofilm induced	0.51375
orf19.119	orf19.119	Ortholog(s) have protein C-terminal S-isoprenylcysteine carboxyl O-methyltransferase activity	0.513
orf19.1190	STV1	Predicted subunit a of vacuolar proton-translocating ATPase V0 domain, Golgi isoform	0.51025
orf19.1191	orf19.1191	Ortholog(s) have ubiquitin-protein ligase activity and role in ER-associated ubiquitin-dependent protein catabolic process	0.51
orf19.1192	DNA2	Protein similar to S. cerevisiae Dna2p, which is a DNA replication factor involved in DNA repair; induced under hydroxyurea treatment	0.50975
orf19.1193	GNP1	Similar to asparagine and glutamine permease; fluconazole, caspofungin induced; regulated by Nrg1, Mig1, Tup1, Gcn2, Gcn4, and alkaline regulated by Rim101; repressed during chlamydospore formation; rat catheter, flow model biofilm induced	0.50925
orf19.1195	orf19.1195	Ortholog(s) have metalloendopeptidase activity, role in cellular iron ion homeostasis, protein processing involved in protein targeting to mitochondrion and mitochondrion localization	0.506
orf19.1196	PKH3	Ortholog(s) have protein kinase activity and role in MAPK cascade involved in cell wall biogenesis, protein phosphorylation	0.506
orf19.1198	orf19.1198	Predicted mitochondrial intermembrane space protein of unknown function; possibly an essential gene, disruptants not obtained by UAU1 method	0.50525
orf19.1199	NOP5	Ortholog of S. cerevisiae Nop58; involved in pre-rRNA process; Tn mutation affects filamentous growth; macrophage/pseudohyphal-induced; physically interacts with TAP-tagged Nop1; Spider biofilm repressed	0.50475
orf19.1200	orf19.1200	Protein of unknown function; Spider biofilm induced	0.50425
orf19.1201	orf19.1201	Ortholog(s) have serine-tRNA ligase activity, role in invasive growth in response to glucose limitation, mitochondrial seryl-tRNA aminoacylation, pseudohyphal growth, spore germination and mitochondrion localization	0.50425
orf19.1202	orf19.1202	Ortholog of C. dubliniensis CD36 : Cd36_60350, C. parapsilosis CDC317 : CPAR2_603550, Candida tenuis NRRL Y-1498 : CANTEDRAFT_114325 and Debaryomyces hansenii CBS767 : DEHA2G04950g	0.50325
orf19.1203	SRO77	Protein with a predicted role in docking and fusion of post-Golgi vesicles with the plasma membrane; filament induced; fungal-specific (no human or murine homolog)	0.50175
orf19.1203.1	orf19.1203.1	Predicted dolichol-phosphate mannosyltransferase subunit; flow model and Spider biofilm repressed	0.50075
orf19.1204	orf19.1204	Phosphorylated protein of unknown function; transcript is upregulated clinical isolates from HIV positive patients with oral candidiasis	0.50025
orf19.1207	orf19.1207	Ortholog of C. dubliniensis CD36 : Cd36_33200 and Candida albicans WO-1 : CAWG_03416	0.49975
orf19.1208	orf19.1208	Predicted ORF in the Major Repeat Sequence on chromosome 4; member of a family encoded by FGR6-related genes in the RB2 repeat sequence	0.4985
orf19.121	ARC18	Putative ARP2/3 complex subunit; mutation confers hypersensitivity to cytochalasin D	0.49775
orf19.1210	orf19.1210	Ortholog(s) have L-arginine transmembrane transporter activity, L-aspartate transmembrane transporter activity and L-glutamate transmembrane transporter activity, more	0.4975
orf19.1212	orf19.1212	Ortholog(s) have FFAT motif binding, phosphatidylinositol binding activity	0.49725
orf19.1214	orf19.1214	Ortholog(s) have metalloaminopeptidase activity, role in protein initiator methionine removal involved in protein maturation and cytosol, nucleus localization	0.49725
orf19.1215	orf19.1215	Ortholog of C. dubliniensis CD36 : Cd36_64550, Candida tropicalis MYA-3404 : CTRG_02747 and Candida albicans WO-1 : CAWG_04972	0.49625
orf19.1217	orf19.1217	Ortholog(s) have ribosome binding, ubiquitin-protein ligase activity and role in chromatin modification, chromatin silencing at telomere, protein ubiquitination, ribosome-associated ubiquitin-dependent protein catabolic process	0.49625
orf19.1219	orf19.1219	Ortholog of Spathaspora passalidarum NRRL Y-27907 : SPAPADRAFT_149713	0.4955
orf19.122	CDC20	Activator of anaphase-promoting complex/cyclosome; induced under Cdc5 depletion; member of conserved Mcm1 regulon; mRNA expression peaks at cell-cycle G2/M phase; mRNA binds She3 and is localized to buds of yeast cells and to hyphal tips	0.4955
orf19.1220	RVS167	SH3-domain- and BAR domain-containing protein involved in endocytosis; null mutant exhibits defects in hyphal growth, virulence, cell wall integrity, and actin patch localization; cosediments with phosphorylated Myo5p	0.4945
orf19.1221	ALG2	Putative mannosyltransferase involved in cell wall mannan biosynthesis; transcription is elevated in chk1, nik1, and sln1 homozygous null mutants	0.49375
orf19.1223	DBF2	Essential serine/threonine protein kinase involved in mitotic spindle formation and cytokinesis; required for septum formation, exit from mitosis, and normal hyphal morphogenesis; virulence-group-correlated expression	0.4935
orf19.1224	FRP3	Putative ammonium transporter; upregulated in the presence of human neutrophils; fluconazole-downregulated; repressed by nitric oxide; Spider biofilm induced; rat catheter biofilm repressed	0.49325
orf19.1225	PEX22	Putative peroxin	0.49325
orf19.1227	ZCF4	Putative Zn(II)2Cys6 transcription factor	0.4905
orf19.1228	HAP2	CCAAT-binding transcription factor; regulates low-iron induction of FRP1; in these conditions CBF comprises Hap43 and probably Hap2 and Hap3; possibly essential, disruptants not obtained by UAU1 method; Cap1-dependent induction in low iron	0.48975
orf19.1229	orf19.1229	Ortholog(s) have importin-alpha export receptor activity, role in cell division, protein export from nucleus and nuclear membrane localization	0.4895
orf19.123	RCN1	Protein involved in calcineurin-dependent signaling that controls stress response and virulence; inhibits calcineurin function	0.48875
orf19.1232	VRG4	GDP-mannose transporter; essential; required for glycosylation, hyphal growth; functional homolog of S. cerevisiae Vrg4p, which imports GDP-mannose from cytoplasm to Golgi for protein and lipid mannosylation; no mammalian homolog	0.48825
orf19.1233	ADE4	Putative phosphoribosylpyrophosphate amidotransferase; flucytosine induced	0.488
orf19.1234	FGR6-10	Protein lacking an ortholog in S. cerevisiae; member of a family encoded by FGR6-related genes in the RB2 repeat sequence; transposon mutation affects filamentous growth	0.488
orf19.1235	HOM3	Putative L-aspartate 4-P-transferase; fungal-specific (no human or murine homolog); regulated by Gcn2 and Gcn4; early-stage flow model biofilm induced	0.488
orf19.1236	GVP36	BAR domain protein; ocalizes to early and late Golgi vesicles; predicted role in adaptation to varying nutrient concentrations, fluid-phase endocytosis, actin cytoskeleton polarization and vacuole biogenesis; rat catheter biofilm repressed	0.48775
orf19.1237	ARO9	Aromatic transaminase; Ehrlich fusel oil pathway of aromatic alcohol biosynthesis; Rim101-dependent pH-regulation (alkaline induced); Hap43-induced gene	0.4835
orf19.1238	TUB4	Putative gamma-tubulin; induced upon adherence to polystyrene; transcript regulated by Nrg1 and Mig1; periodic mRNA expression, peak at cell-cycle S/G2 phase	0.48275
orf19.1239	orf19.1239	Secreted protein; exogenously expressed protein is a substrate for Kex2 processing in vitro; fluconazole-regulated; Spider biofilm induced	0.482
orf19.124	CIC1	Putative proteasome-interacting protein; rat catheter biofilm induced	0.48175
orf19.1240	orf19.1240	Ortholog of S. cerevisiae : YPR117W, C. glabrata CBS138 : CAGL0D04510g, C. dubliniensis CD36 : Cd36_45200, C. parapsilosis CDC317 : CPAR2_500480 and Candida tenuis NRRL Y-1498 : CANTEDRAFT_120679	0.48125
orf19.1244	GYP2	Ortholog(s) have Rab GTPase activator activity, role in intracellular protein transport and cell division site, cytosol localization	0.481
orf19.1246	orf19.1246	Putative eisosome component role in proper eisosome assembly; upregulated in cyr1 null mutant	0.4785
orf19.1247	orf19.1247	Ortholog of C. dubliniensis CD36 : Cd36_45230, C. parapsilosis CDC317 : CPAR2_500450, Candida tenuis NRRL Y-1498 : CANTEDRAFT_103249 and Debaryomyces hansenii CBS767 : DEHA2C07524g	0.4775
orf19.1248	orf19.1248	Putative RNA polymerase II subunit B44; heterozygous null mutant exhibits resistance to parnafungin in the C. albicans fitness test; Spider biofilm repressed	0.477
orf19.1249	orf19.1249	Ortholog(s) have 1-(5-phosphoribosyl)-5-[(5-phosphoribosylamino)methylideneamino]imidazole-4-carboxamide isomerase activity, role in histidine biosynthetic process and cytosol, nucleus localization	0.476
orf19.125	EBP1	NADPH oxidoreductase; interacts with phenolic substrates (17beta-estradiol); possible role in estrogen response; induced by oxidative, weak acid stress, NO, benomyl, GlcNAc; Cap1, Mnl1 induced; Hap43-repressed; rat catheter biofilm induced	0.47525
orf19.1250	orf19.1250	Ortholog(s) have role in maturation of SSU-rRNA from tricistronic rRNA transcript (SSU-rRNA, 5.8S rRNA, LSU-rRNA) and cytoplasm, nucleolus localization	0.474
orf19.1251	BRN1	Putative condensin complex subunit; cell-cycle regulated periodic mRNA expression	0.474
orf19.1252	YME1	Ortholog(s) have ATP-dependent peptidase activity	0.474
orf19.1253	PHO4	bHLH transcription factor of the myc-family; required for growth in medium lacking phosphate and for resistance to copper and Phloxine B; induced by Mnl1 under weak acid stress	0.47325
orf19.1254	SEC23	Putative GTPase-activating protein; regulated upon yeast-hypha switch; Spider biofilm repressed	0.4725
orf19.1255	ZCF5	Zn(II)2Cys6 transcription factor; colony morphology-related gene regulation by Ssn6	0.4725
orf19.1257	orf19.1257	Ortholog of Candida albicans WO-1 : CAWG_03251	0.4715
orf19.1258	orf19.1258	Adhesin-like protein; regulated by Tsa1, Tsa1B in minimal media at 37 deg; clade-associated gene expression; induced by alpha pheromone in SpiderM medium; Hap43-induced; Spider biofilm repressed	0.4715
orf19.1259	orf19.1259	Ortholog(s) have DNA binding, ubiquitin-protein ligase activity and role in histone catabolic process, histone ubiquitination, regulation of transcription from RNA polymerase II promoter in response to oxidative stress	0.4715
orf19.1260	LEA1	Predicted component of U2 snRNP; induced by alpha pheromone in SpiderM medium	0.469
orf19.1261	CGT1	mRNA 5' guanylyltransferase; small subunit of mRNA capping enzyme; binds an RNA Pol II C-terminal domain peptide; Cet1p and Cgt1p form a 2:1 complex; functional homolog of S. cerevisiae Ceg1p	0.468
orf19.1263	CFL1	Protein similar to ferric reductase Fre10p; possible functional homolog of S. cerevisiae Fre1p (reports differ); transcription is negatively regulated by Sfu1p, copper, amphotericin B, caspofungin; induced by ciclopirox olamine	0.46775
orf19.1264	CFL2	Oxidoreductase; iron utilization; Sfu1/Sef1/Hap43/Nrg1/Tup1/Rim101 regulated; alkaline/low iron/fluphenazine/ciclopirox olamine, flucytosine, fluconazole, Spider/flow model/rat catheter biofilm induced; caspofungin/amphotericin B repressed	0.46575
orf19.1265	orf19.1265	Ortholog(s) have Rab guanyl-nucleotide exchange factor activity and role in CVT pathway, early endosome to Golgi transport, intra-Golgi vesicle-mediated transport, macroautophagy, regulation of Rab GTPase activity	0.4645
orf19.1266	orf19.1266	Protein of unknown function; transcript detected on high-resolution tiling arrays	0.464
orf19.1267	orf19.1267	Ortholog of S. cerevisiae : CAJ1, C. glabrata CBS138 : CAGL0L00957g, C. dubliniensis CD36 : Cd36_45380, C. parapsilosis CDC317 : CPAR2_500650 and Candida tenuis NRRL Y-1498 : CANTEDRAFT_132273	0.4615
orf19.1267.1	orf19.1267.1	Ortholog(s) have enzyme activator activity, role in iron-sulfur cluster assembly and extrinsic to mitochondrial inner membrane, mitochondrial matrix localization	0.46125
orf19.1268	orf19.1268	Protein of unknown function; transcript detected on high-resolution tiling arrays; rat catheter biofilm induced	0.461
orf19.1270	FRE3	Protein with similarity to ferric reductase Fre10p; possibly an essential gene, disruptants not obtained by UAU1 method	0.459
orf19.1272	orf19.1272	Protein of unknown function; may play a role in regulation of cell size; rat catheter biofilm repressed	0.4565
orf19.1273	orf19.1273	Ortholog(s) have tubulin binding activity, role in tubulin complex assembly and prefoldin complex localization	0.4555
orf19.1274	orf19.1274	Has domain(s) with predicted DNA binding, zinc ion binding activity, role in transcription, DNA-templated and nucleus localization	0.455
orf19.1275	GAT1	GATA-type transcription factor; regulator of nitrogen utilization; required for nitrogen catabolite repression and utilization of isoleucine, tyrosine and tryptophan N sources; required for virulence in a mouse systemic infection model	0.454
orf19.1276	orf19.1276	Protein with a selenoprotein domain and a thioredoxin-like fold domain; similar to S. cerevisiae Vhs3p, which is a putative phosphopantothenoylcysteine decarboxylase	0.45375
orf19.1277	orf19.1277	Protein of unknown function; Rgt1, Hap43-repressed; flow model biofilm induced; Spider biofilm induced	0.44725
orf19.1279	CDS1	Protein similar to S. cerevisiae Cds1p; transposon mutation affects filamentous growth	0.44575
orf19.1280	SUI1	Putative translation initiation factor; flucytosine induced; genes encoding ribosomal subunits, translation factors, and tRNA synthetases are downregulated upon phagocytosis by murine macrophage	0.44475
orf19.1281	orf19.1281	Putative splicing factor required for the first step of pre-mRNA splicing; Spider biofilm induced	0.44425
orf19.1282	CKS1	Ortholog(s) have histone binding, protein complex binding, protein homodimerization activity, protein kinase activator activity, ubiquitin binding activity	0.444
orf19.1283	MEC1	Cell cycle checkpoint protein with a role in genome integrity; RNA abundance regulated by tyrosol and cell density	0.444
orf19.1285	orf19.1285	Plasma membrane-localized protein of unknown function; Hap43p-repressed gene	0.443
orf19.1286	orf19.1286	Ortholog of Candida albicans WO-1 : CAWG_04776	0.442
orf19.1287	orf19.1287	Protein of unknown function; flow model biofilm induced; Spider biofilm induced	0.4395
orf19.1288	FOX2	3-hydroxyacyl-CoA epimerase; fatty acid beta-oxidation; induced by phagocytosis; regulated by Mig1, by white-opaque switch, by DNA methylation; transcriptional activation by oleate requires Ctf1; rat catheter and Spider biofilm induced	0.4395
orf19.1289	SCT1	Putative glycerol-3-phosphate O-acyltransferase; fungal-specific (no human or murine homolog)	0.439
orf19.1290	XKS1	Putative xylulokinase; Hap43-repressed; induced by prostaglandins; rat catheter biofilm repressed	0.438
orf19.1291	ABZ1	Ortholog(s) have 4-amino-4-deoxychorismate synthase activity, role in para-aminobenzoic acid biosynthetic process and cytosol, nucleus localization	0.43775
orf19.1295	VAS1	Putative tRNA-Val synthetase; genes encoding ribosomal subunits, translation factors, and tRNA synthetases are downregulated upon phagocytosis by murine macrophage	0.4375
orf19.1296	orf19.1296	Ortholog(s) have role in spliceosomal snRNP assembly and U4/U6 x U5 tri-snRNP complex, mitochondrion localization	0.43675
orf19.1297	orf19.1297	Ortholog(s) have phosphatidylinositol-3-phosphate binding activity and role in CVT pathway, early endosome to Golgi transport, macroautophagy, mitochondrion degradation	0.4365
orf19.1298	NUP84	Ortholog(s) have structural constituent of nuclear pore activity	0.4365
orf19.1299	RPN6	Putative 26S proteasome subunit; Hap43p-induced gene; regulated by Gcn2p and Gcn4p	0.435
orf19.130	orf19.130	Ortholog(s) have protein serine/threonine kinase activity, ubiquitin binding activity	0.433
orf19.1300	orf19.1300	Putative mitochondrial membrane protein; homozygous transposon insertion causes decreased colony wrinkling under filamentous growth-inducing conditions, but does not block true hyphal formation in liquid media	0.4325
orf19.1301	orf19.1301	Ortholog(s) have cytoplasm, nucleus, ribosome localization	0.43125
orf19.1302	orf19.1302	Ortholog of C. dubliniensis CD36 : Cd36_43500, Spathaspora passalidarum NRRL Y-27907 : SPAPADRAFT_64619, Candida tropicalis MYA-3404 : CTRG_00335 and Candida albicans WO-1 : CAWG_03437	0.43025
orf19.1303	orf19.1303	Ortholog(s) have translation release factor activity, role in mitochondrial translational termination and mitochondrion localization	0.429
orf19.1304	orf19.1304	Ortholog(s) have role in U4 snRNA 3'-end processing, exonucleolytic trimming to generate mature 3'-end of 5.8S rRNA from tricistronic rRNA transcript (SSU-rRNA, 5.8S rRNA and LSU-rRNA), more	0.42725
orf19.1305	orf19.1305	Ortholog(s) have tRNA (guanine) methyltransferase activity, role in tRNA methylation and mitochondrial matrix, nucleus localization	0.4265
orf19.1306	orf19.1306	Ortholog(s) have cytosol, nucleus localization	0.4265
orf19.1307	orf19.1307	Predicted membrane protein; rat catheter biofilm induced	0.42625
orf19.1308	orf19.1308	Predicted membrane transporter, member of the drug:proton antiporter (14 spanner) (DHA2) family, major facilitator superfamily (MFS)	0.425
orf19.1309	orf19.1309	Ortholog of C. dubliniensis CD36 : Cd36_43290, C. parapsilosis CDC317 : CPAR2_403630, Candida tenuis NRRL Y-1498 : CANTEDRAFT_114295 and Debaryomyces hansenii CBS767 : DEHA2G17336g	0.42425
orf19.131	orf19.131	Ortholog of C. dubliniensis CD36 : Cd36_61330, C. parapsilosis CDC317 : CPAR2_602800, Candida tenuis NRRL Y-1498 : CANTEDRAFT_94450 and Debaryomyces hansenii CBS767 : DEHA2F15554g	0.424
orf19.131.2	orf19.131.2	Ortholog(s) have endoplasmic reticulum localization	0.42325
orf19.1310	orf19.1310	Ortholog(s) have role in nucleotide-excision repair and nucleus localization	0.422
orf19.1311	SPO75	Ortholog(s) have role in ascospore wall assembly	0.422
orf19.1313	CDR3	Transporter of the Pdr/Cdr family of the ATP-binding cassette superfamily; transports phospholipids out-to-in; expressed in opaque-phase cells; induced by macrophage interaction; fluconazole-repressed; Spider biofilm induced	0.42175
orf19.1314	orf19.1314	Protein of unknown function; planktonic growth-induced gene	0.42125
orf19.1317	OSH3	Protein required for wild-type filamentation; has oxysterol binding protein domain and pleckstrin homology motif; overproducton suppresses cph1 homozygous null filamnetation defect; similar to S. cerevisiae Osh3p	0.42025
orf19.1318	orf19.1318	Ortholog of C. dubliniensis CD36 : Cd36_43350, C. parapsilosis CDC317 : CPAR2_403560, Debaryomyces hansenii CBS767 : DEHA2A08250g and Pichia stipitis Pignal : PICST_29838	0.42
orf19.132	orf19.132	Ortholog(s) have role in histone deacetylation, negative regulation of chromatin silencing at telomere, negative regulation of meiosis, positive regulation of stress-activated MAPK cascade	0.4195
orf19.1321	HWP1	Hyphal cell wall protein; host transglutaminase substrate; opaque-, a-specific, alpha-factor induced; at MTLa side of conjugation tube; virulence complicated by URA3 effects; Bcr1-repressed in RPMI a/a biofilms; Spider biofilm induced	0.4195
orf19.1323	orf19.1323	Phosphorylated protein of unknown function; Hap43p-repressed gene	0.41925
orf19.1324	RAD2	Ortholog of S. cerevisiae Rad2, a nucleotide excision repair nuclease; null mutant is extremely sensitive to UV irradiation; transcript induced by interaction with macrophages	0.41825
orf19.1325	ECM38	Putative gamma-glutamyltransferase; alkaline upregulated; Spider biofilm induced; possibly an essential gene, disruptants not obtained by UAU1 method	0.418
orf19.1326	orf19.1326	Ortholog of Candida albicans WO-1 : CAWG_03455	0.418
orf19.1327	RBT1	Cell wall protein with similarity to Hwp1; required for virulence; predicted glycosylation; fluconazole, Tup1 repressed; farnesol, alpha factor, serum, hyphal and alkaline induced; Rfg1, Rim101-regulated	0.418
orf19.133	orf19.133	Protein of unknown function; induced by nitric oxide independent of Yhb1p	0.4165
orf19.1330	orf19.1330	Ortholog of Candida albicans WO-1 : CAWG_05678	0.4155
orf19.1331	HSM3	Ortholog(s) have role in mismatch repair, proteasome regulatory particle assembly and cytosol, nucleus, proteasome regulatory particle, base subcomplex localization	0.4155
orf19.1332	SNG4	Putative membrane transporter; Hap43-induced; inducd by Mnl1p under weak acid stress; shows Mob2-dependent hyphal regulation	0.41375
orf19.1333	SNG3	Putative membrane transporter; Hap43p-induced gene; mutation confers hypersensitivity to toxic ergosterol analog; shows colony morphology-related gene regulation by Ssn6p	0.41375
orf19.1334	orf19.1334	Protein of unknown function; repressed by alpha pheromone in SpiderM medium	0.41325
orf19.1335	orf19.1335	Ortholog of S. cerevisiae Mtr4, an ATP-dependent 3'-5' RNA helicase of the DEAD-box family; Hap43-induced gene; Spider biofilm induced	0.41325
orf19.1336	PUP3	Putative beta 3 subunit of the 20S proteasome; macrophage/pseudohyphal-repressed	0.41275
orf19.1336.2	orf19.1336.2	Ortholog(s) have role in mitochondrial respiratory chain complex assembly and mitochondrial intermembrane space, nucleus localization	0.412
orf19.1338	orf19.1338	Protein of unknown function; possible COPI-coated vesicle, Golgi apparatus, ribosome localization; rat catheter biofilm repressed	0.4115
orf19.1339	CPY1	Carboxypeptidase Y; transcript regulated at yeast-hypha transition or macrophage response; induced human neutrophils; regulated by Gcn2 and Gcn4; putative N-glycosylation	0.4105
orf19.134	orf19.134	Protein of unknown function; overlaps retrotransposon Tca13; ciclopirox olamine induced	0.4105
orf19.1340	orf19.1340	Putative aldose reductase; protein level decreases in stationary phase cultures; Spider biofilm repressed	0.41
orf19.1341	PRR2	Putative serine/threonine protein kinase; mutation confers resistance to 5-fluorocytosine (5-FC)	0.40925
orf19.1342	SHM1	Mitochondrial serine hydroxymethyltransferase; complements the glycine auxotrophy of an S. cerevisiae shm1 null shm2 null gly1-1 triple mutant; protein present in exponential and stationary growth phase yeast cultures	0.409
orf19.1343	MED16	Putative RNA polymerase II mediator complex subunit; induced by nitric oxide	0.40875
orf19.1344	orf19.1344	Protein of unknown function; fluconazole-induced; Spider biofilm induced	0.40875
orf19.1345	LIP8	Secreted lipase, member of a differentially expressed lipase gene family with possible roles in nutrition and/or in creating an acidic microenvironment; LIP5 and LIP8 are expressed at all stages of both mucosal and systemic infection	0.4075
orf19.1348	orf19.1348	Ortholog of C. dubliniensis CD36 : Cd36_22500, Candida tropicalis MYA-3404 : CTRG_01825 and Candida albicans WO-1 : CAWG_05921	0.40625
orf19.1349	orf19.1349	Ortholog of C. dubliniensis CD36 : Cd36_22470, Candida tropicalis MYA-3404 : CTRG_01829 and Candida albicans WO-1 : CAWG_05920	0.40525
orf19.135	EXO84	Predicted subunit of the exocyst complex, involved in exocytosis; localizes to a crescent on the surface of the hyphal tip	0.4045
orf19.1350	orf19.1350	Protein with a thioredoxin domain; predicted role in cell redox homeostasis; rat catheter and Spider biofilm induced	0.4045
orf19.1351	orf19.1351	Ortholog of C. parapsilosis CDC317 : CPAR2_407000, C. dubliniensis CD36 : Cd36_22440, Candida tenuis NRRL Y-1498 : cten_CGOB_00049 and Lodderomyces elongisporus NRLL YB-4239 : LELG_02401	0.4035
orf19.1352	TIM22	Mitochondrial inner membrane protein; predicted role in protein import; Hap43-repressed gene; flow model biofilm induced; Spider biofilm repressed	0.403
orf19.1353	orf19.1353	Protein of unknown function; repressed by yeast-hypha switch; Ras1-regulated; oral infection induced; mutants defective in damage to oral epithelium; flow model biofilm induced; Spider biofilm induced	0.403
orf19.1354	UCF1	Upregulated by cAMP in filamentous growth; induced in high iron, decreased upon yeast-hypha switch; downregulation correlates with clinical fluconazole resistance; Ras1-regulated; Hap43-repressed; flow model biofilm induced	0.4005
orf19.1355	orf19.1355	Putative protein of unknown function; stationary phase enriched protein	0.4
orf19.1356	orf19.1356	Ortholog(s) have thiosulfate sulfurtransferase activity, role in tRNA wobble position uridine thiolation and mitochondrion localization	0.4
orf19.1357	FCY21	High affinity, high capacity, hypoxanthine-adenine-guanine-cytosine/H+ symporter; similar to S. cerevisiae Fcy2; mutation confers resistance to 5-fluorocytosine (5-FC); flow model biofilm induced	0.3995
orf19.1358	GCN4	bZIP transcription factor; amino acid control response; required for Efg1-dependent pseudohyphal induction by amino acid starvation, not by serum; human whole blood and PMN induced; required for biofilm formation; Spider biofilm induced	0.399
orf19.1359	orf19.1359	Ortholog(s) have protein complex binding activity, role in ER-associated ubiquitin-dependent protein catabolic process, sporulation resulting in formation of a cellular spore and cytoplasm, extrinsic to membrane, nucleus localization	0.39875
orf19.136	orf19.136	Predicted membrane transporter, member of the drug:proton antiporter (12 spanner) (DHA1) family, major facilitator superfamily (MFS); Hap43p-repressed gene	0.39825
orf19.1360	orf19.1360	Ortholog(s) have role in mitochondrial genome maintenance and mitochondrion localization	0.39825
orf19.1360.1	orf19.1360.1	Putative adhesin-like protein	0.39825
orf19.1361	TIM23	Protein involved in mitochondrial matrix protein import	0.398
orf19.1362	SMM1	Putative dihydrouridine synthase; Hap43-induced gene; rat catheter biofilm induced; Spider biofilm induced	0.39775
orf19.1363	orf19.1363	Putative protein of unknown function; Plc1-regulated; transcript induced by Mnl1 under weak acid stress; flow model, rat catheter, Spider biofilm induced	0.3965
orf19.1364	orf19.1364	Ortholog of S. pombe Stm1 G-protein coupled receptor; PQ-loop domains; constitutive expression independent of MTL or white-opaque status; Hap43-repressed	0.39625
orf19.1365	orf19.1365	Putative monooxygenase; mutation confers hypersensitivity to toxic ergosterol analog; constitutive expression independent of MTL or white-opaque status	0.39575
orf19.1366	orf19.1366	Has domain(s) with predicted oxidoreductase activity, acting on paired donors, with incorporation or reduction of molecular oxygen, 2-oxoglutarate as one donor, and incorporation of one atom each of oxygen into both donors activity	0.3955
orf19.1367	MTW1	Kinetochore component; amount of Nuf2p and Mtw1p protein detected at each centromere is consistent with a single kinetochore microtubule attachment site	0.395
orf19.1368	orf19.1368	Protein of unknown function; flow model biofilm induced; Spider biofilm induced	0.395
orf19.1369	orf19.1369	Protein with predicted peptidase domains; Hap43-repressed gene	0.395
orf19.137	orf19.137	Putative transferase involved in phospholipid biosynthesis; induced by alpha pheromone in SpiderM medium	0.395
orf19.1370	orf19.1370	Protein of unknown function; expression regulated by white-opaque switch; repressed by alpha pheromone in SpiderM medium	0.395
orf19.1371	orf19.1371	Ortholog of C. dubliniensis CD36 : Cd36_23880, C. parapsilosis CDC317 : CPAR2_806590, Candida tenuis NRRL Y-1498 : CANTEDRAFT_92769 and Debaryomyces hansenii CBS767 : DEHA2B13376g	0.39375
orf19.1372	orf19.1372	Protein of unknown function; transcript regulated by Mig1 and Tup1	0.3935
orf19.1373	INP51	Putative phosphatidylinositol-4,5-bisphosphate phosphatase; involved in maintenance of phosphoinositide levels; affects hyphal growth, virulence, cell integrity; interacts with Irs4p	0.3935
orf19.1374	orf19.1374	Ortholog of C. dubliniensis CD36 : Cd36_23840, Candida tenuis NRRL Y-1498 : CANTEDRAFT_104074, Debaryomyces hansenii CBS767 : DEHA2B13310g and Pichia stipitis Pignal : PICST_58235	0.39325
orf19.1375	LEU42	Putative alpha-isopropylmalate synthase; fungal-specific; induced by human blood or polymorphonuclear cells; regulated by Gcn2 and Gcn4; stationary phase enriched protein; Spider biofilm induced	0.39275
orf19.1376	orf19.1376	Ortholog(s) have SNAP receptor activity, phosphatidic acid binding activity	0.3915
orf19.1377	IPK2	Putative inositol polyphosphate multikinase; moderately induced at 42 deg	0.3905
orf19.1378	SUP35	Translation factor eRF3; shows prion-like aggregation in some, not all, studies; partially complements S. cerevisiae sup35 mutant translation defect; species barrier with S. cerevisiae Sup35p prion; gene not regulated by yeast-hyphal switch	0.3905
orf19.138	FIG1	S. cerevisiae Fig1 ortholog; an integral membrane protein required for mating; role in thigmotropism; transcript is opaque-specific and a-specific; activated by Cph1 or alpha pheromone	0.3905
orf19.1381	orf19.1381	Ortholog of S. cerevisiae/S. pombe Lsb5; predicted role in actin cortical patch localization, actin filament organization, endocytosis; flow model biofilm induced; Spider biofilm repressed	0.39025
orf19.1382	YEA4	Putative uridine diphosphate-N-acetylglucosamine (UDP-GlcNAc) transporter; required for cell wall chitin synthesis; induced by alpha pheromone in SpiderM medium	0.39025
orf19.1383	orf19.1383	Protein of unknown function; induced by alpha pheromone in SpiderM medium	0.38975
orf19.1386	orf19.1386	Ortholog(s) have SNAP receptor activity and role in ER to Golgi vesicle-mediated transport, retrograde vesicle-mediated transport, Golgi to ER, vesicle fusion	0.389
orf19.1387	orf19.1387	Ortholog(s) have 4 iron, 4 sulfur cluster binding activity, role in iron-sulfur cluster assembly, tRNA wobble uridine modification and cytoplasm localization	0.389
orf19.1388	orf19.1388	Putative 66S pre-ribosomal particle component; Hap43-induced; F-12/CO2 early biofilm induced	0.3885
orf19.1389	orf19.1389	Ortholog(s) have poly(A) RNA binding activity, role in mRNA metabolic process and cytoplasm localization	0.387
orf19.139	TRA1	Subunit of the NuA4 histone acetyltransferase complex	0.386
orf19.1390	PMI1	Phosphomannose isomerase; cell wall biosynthesis enzyme; drug target; functional homolog of S. cerevisiae, E. coli phosphomannose isomerase; Gcn4-regulated; induced on adherence to polystyrene, phagocytosis; 3-AT, Spider biofilm repressed	0.386
orf19.1391	orf19.1391	Protein with similarity to trimeric LpxA-like enzymes; Hap43-repressed gene	0.385
orf19.1392	orf19.1392	Ortholog(s) have chaperone binding, protein disulfide isomerase activity, unfolded protein binding activity and role in ER-associated ubiquitin-dependent protein catabolic process, protein retention in ER lumen	0.385
orf19.1393	orf19.1393	Ortholog(s) have NAD transporter activity, pyruvate secondary active transmembrane transporter activity, role in NAD transmembrane transport, mitochondrial pyruvate transport and endoplasmic reticulum, mitochondrion localization	0.38375
orf19.1394	orf19.1394	Putative protein of unknown function; mutant is viable; protein level decreases in stationary phase cultures; Spider biofilm induced	0.383
orf19.1395	orf19.1395	Ortholog(s) have inorganic phosphate transmembrane transporter activity, role in phosphate ion transport, transmembrane transport and mitochondrion localization	0.38175
orf19.1396	orf19.1396	Ortholog(s) have ARF GTPase activator activity, role in ER to Golgi vesicle-mediated transport, intra-Golgi vesicle-mediated transport and Golgi apparatus, clathrin-coated vesicle localization	0.38175
orf19.1397	orf19.1397	Has domain(s) with predicted heme binding activity	0.3815
orf19.1400	orf19.1400	Ortholog of C. dubliniensis CD36 : Cd36_23640, C. parapsilosis CDC317 : CPAR2_406130, Candida tenuis NRRL Y-1498 : CANTEDRAFT_116273 and Debaryomyces hansenii CBS767 : DEHA2B11176g	0.3805
orf19.1401	EAP1	GPI-anchored cell wall adhesin; Efg1-regulated; mutant suppresses cell adhesion, filamentation, invasive growth defects of S. cerevisiae flo8 or flo11 mutant; biofilm induced; required for biofilm formation; Bcr1-repressed in a/a biofilms	0.38
orf19.1402	CCT2	Chaperonin of the cytosolic TCP1 ring complex; protein present in exponential and stationary-phase yeast cells, but higher amounts in stationary phase; GlcNAc-induced protein	0.37975
orf19.1403	orf19.1403	Ortholog(s) have ATP:ADP antiporter activity, calcium ion binding activity, role in ADP transport, ATP transport, mitochondrial transport and mitochondrion localization	0.3795
orf19.1404	orf19.1404	Predicted tRNA dihydrouridine synthase; Spider biofilm induced	0.37925
orf19.1405	PHO13	Putative 4-nitrophenylphosphatase; Hap43p-repressed gene; transcription is regulated upon yeast-hyphal switch	0.37925
orf19.1406	orf19.1406	Ortholog(s) have DNA-directed DNA polymerase activity, role in error-free translesion synthesis, error-prone translesion synthesis and mitochondrion, nuclear chromatin, zeta DNA polymerase complex localization	0.37925
orf19.1409	VAC7	Ortholog of S. cerevisiae Vac7; integral vacuolar membrane protein involved in vacuole inheritance and morphology; mutants are viable	0.37925
orf19.1409.1	orf19.1409.1	Ribosomal 60S subunit protein L22B; Spider biofilm repressed	0.378
orf19.1411	orf19.1411	Putative cytochrome P450; Hap43-repressed gene	0.378
orf19.1412	orf19.1412	Ortholog of C. dubliniensis CD36 : Cd36_44020, C. parapsilosis CDC317 : CPAR2_302330, Candida tenuis NRRL Y-1498 : CANTEDRAFT_105448 and Debaryomyces hansenii CBS767 : DEHA2C10582g	0.378
orf19.1413	YFH1	Frataxin; may be required for iron storage or delivery; role in oxidative stress resistance; transcript regulated by Nrg1, repressed if iron absent induced by macrophage interaction; Hap43-repressed gene	0.377
orf19.1414	orf19.1414	Protein of unknown function; transcript is upregulated in an RHE model of oral candidiasis; Hap43-repressed	0.3765
orf19.1415	FRE10	Major cell-surface ferric reductase under low-iron conditions; 7 transmembrane regions and a secretion signal predicted; Tup1, Rim101, Ssn6, Hog1, caspofungin repressed; ciclopirox olamine induced; rat catheter biofilm induced	0.376
orf19.1416	COX11	Cytochrome oxidase assembly protein; transcript regulated by Nrg1; protein repressed during the mating process; Hap43-repressed gene; rat catheter biofilm induced	0.3755
orf19.1416	COX11	Cytochrome oxidase assembly protein; transcript regulated by Nrg1; protein repressed during the mating process; Hap43-repressed gene; rat catheter biofilm induced	0.3755
orf19.1418	SEC15	Predicted exocyst subunit; cellular bud tip-associated protein; ortholog of S. cerevisiae SEC15	0.37475
orf19.1420	orf19.1420	Ortholog(s) have cytosol, nucleus localization	0.3745
orf19.1421	orf19.1421	Ortholog(s) have ureidoglycolate hydrolase activity and cytosol, nucleus localization	0.374
orf19.1422	FZO1	Mitochondrial biogenesis protein; rat catheter and Spider biofilm induced	0.37375
orf19.1424	orf19.1424	Predicted membrane transporter, member of the oxalate:formate antiporter (OFA) family, major facilitator superfamily (MFS)	0.37375
orf19.1426	orf19.1426	Ortholog of S. cerevisiae Skg6; localizes to the cell cortex, cell bud neck, cell bud tip, incipient cellular bud site, and is membrane-bound; Spider biofilm induced	0.373
orf19.1427	orf19.1427	Putative transporter; fungal-specific; Spider biofilm induced	0.373
orf19.1428	DUO1	Subunit of the Dam1 (DASH) complex, which acts in chromosome segregation by coupling kinetochores to spindle microtubules	0.373
orf19.1429	SOH1	Subunit of the RNA polymerase II mediator complex; involved in control of cytokinesis, morphogenesis, biofilm formation, virulence; cell-cycle regulated periodic mRNA expression	0.37275
orf19.1430	orf19.1430	Ortholog of C. parapsilosis CDC317 : CPAR2_402120, C. dubliniensis CD36 : Cd36_43870, Lodderomyces elongisporus NRLL YB-4239 : LELG_04437 and Candida orthopsilosis Co 90-125 : CORT_0E02170	0.3725
orf19.1433	orf19.1433	Protein of unknown function; Hap43-repressed; colony morphology-related gene regulation by Ssn6; Spider biofilm induced	0.371
orf19.1434	orf19.1434	Ortholog(s) have protein kinase activator activity	0.3705
orf19.1435	TEF1	Translation elongation factor 1-alpha; at cell surface; binds human plasminogen; macrophage/pseudohyphal-induced; induced in RHE model of oral candidiasis, in clinical oral candidiasis isolates; possibly essential; Spider biofilm repressed	0.37
orf19.1438	orf19.1438	Protein with homology to NADH dehydrogenase; regulated by Sef1p-, Sfu1p-, and Hap43p	0.37
orf19.1439	IPK1	Ortholog of S. cerevisiae/S. pombe Ipk1; an inositol pentakisphosphate 2-kinase, a nuclear protein required for synthesis of 1,2,3,4,5,6-hexakisphosphate; Spider biofilm induced	0.36975
orf19.144	SNU114	Protein similar to S. cerevisiae Snu114p, which is an RNA helicase involved in pre-mRNA splicing; likely to be essential for growth, based on an insertional mutagenesis strategy	0.3695
orf19.1440	orf19.1440	Ortholog of C. dubliniensis CD36 : Cd36_43090, C. parapsilosis CDC317 : CPAR2_403340, Candida tenuis NRRL Y-1498 : CANTEDRAFT_94387 and Debaryomyces hansenii CBS767 : DEHA2G17622g	0.36925
orf19.1441	orf19.1441	Ortholog of C. dubliniensis CD36 : Cd36_16230, C. parapsilosis CDC317 : CPAR2_213950, Candida tenuis NRRL Y-1498 : CANTEDRAFT_112720 and Debaryomyces hansenii CBS767 : DEHA2A01848g	0.36775
orf19.1442	PLB4.5	Phospholipase B; Hog1-induced; regulated by Ssn6; putative GPI-anchor; repressed during cell wall regeneration; clade-associated gene expression; Hap43-induced; rat catheter and Spider biofilm repressed	0.3675
orf19.1444	orf19.1444	Ortholog(s) have phosphatidylinositol-4,5-bisphosphate binding activity, role in actin cortical patch assembly, actin filament organization, endocytosis and actin cortical patch, mating projection tip localization	0.3675
orf19.1445	ESC4	Protein similar to S. cerevisiae Esc4; a protein that represses transposition; transposon mutation affects filamentation; rat catheter biofilm repressed	0.36675
orf19.1446	CLB2	B-type mitotic cyclin (cyclin-dependent protein kinase regulatory subunit); essential; required for wild-type mitotic exit; role in cell polarization; interacts with catalytic subunit Cdk1; Spider biofilm repressed	0.36575
orf19.1447	orf19.1447	Ortholog of C. dubliniensis CD36 : Cd36_16290, C. parapsilosis CDC317 : CPAR2_214050, Candida tenuis NRRL Y-1498 : CANTEDRAFT_92180 and Debaryomyces hansenii CBS767 : DEHA2A01738g	0.36475
orf19.1448	APT1	Adenine phosphoribosyltransferase; flucytosine induced; repressed by nitric oxide; protein level decreased in stationary phase yeast cultures	0.3635
orf19.1448.1	orf19.1448.1	Ortholog(s) have plus-end-directed microtubule motor activity	0.363
orf19.1449	orf19.1449	Protein of unknown function; induced in azole-resistant strain that overexpresses MDR1; protein present in exponential and stationary growth phase yeast cultures; Spider biofilm induced	0.36275
orf19.145	RPB4	Protein similar to S. cerevisiae Rpb4p, which is a component of RNA polymerase II; transposon mutation affects filamentous growth	0.36225
orf19.1450	orf19.1450	Ortholog of C. dubliniensis CD36 : Cd36_16320, Candida tropicalis MYA-3404 : CTRG_01238 and Candida albicans WO-1 : CAWG_03918	0.361
orf19.1451	SRB9	Subunit of the RNA polymerase II mediator complex; transposon mutation affects filamentous growth; suppresses S. cerevisiae diploid filamentous (flo8, ste7, ste12, tec1) or haploid invasive (flo8) mutant growth defects	0.3605
orf19.1453	SPT5	Protein similar to S. cerevisiae Spt5p transcription elongation factor; transposon mutation affects filamentous growth	0.35925
orf19.1456	orf19.1456	Ortholog of Candida albicans WO-1 : CAWG_03922	0.35775
orf19.1457	orf19.1457	Putative RNA polymerase transcription factor TFIIH core component; possibly an essential gene, disruptants not obtained by UAU1 method	0.3575
orf19.1458	orf19.1458	Ortholog(s) have tRNA-specific adenosine deaminase activity, role in tRNA modification and cytoplasm, nucleus localization	0.35725
orf19.1459	PPE1	Protein similar to S. cerevisiae Ppe1p; shows genetic interaction with some genes involved in diploid filamentous growth and haploid invasive growth in S. cerevisiae	0.35725
orf19.1460	orf19.1460	Putative glutamine-dependent NAD synthetase, involved in NAD salvage pathway	0.356
orf19.1461	orf19.1461	S. pombe ortholog SPCC576.01c is a predicted sulfonate dioxygenase; possibly transcriptionally regulated upon hyphal formation; Spider biofilm induced	0.3555
orf19.1462	SMP2	Putative Mg2+-dependent phosphatidate phosphatase; transcript regulated by Nrg1	0.35475
orf19.1464	BMT5	Putative beta-mannosyltransferase involved in beta-1,2-mannosylation of phospholipomannan; 9-member family includes Bmt1, Bmt2, Bmt3, and Bmtp with roles in mannosylation of cell wall phosphopeptidomannan; Spider biofilm induced	0.354
orf19.1465	orf19.1465	Has domain(s) with predicted N-acetyltransferase activity	0.354
orf19.1466	REX2	Putative 3'-5' RNA exonuclease with a predicted role in 3'-end processing of U4 and U5 snRNAs, 5S and 5.8S rRNAs; rat catheter biofilm induced	0.35325
orf19.1467	COX13	Cytochrome c oxidase; flucytosine induced; repressed by nitric oxide	0.35275
orf19.1468	CDC55	Ortholog(s) have protein phosphatase type 2A regulator activity, protein serine/threonine phosphatase activity	0.3525
orf19.147	YAK1	Predicted serine-threonine protein kinase; involved in hyphal growth regulation and biofilm formation; flow model biofilm induced; induced in core caspofungin response	0.352
orf19.1470	RPS26A	Ribosomal protein; regulated by Nrg1, Tup1; repressed upon phagocytosis by murine macrophage; alternatively spliced intron in 5'-UTR; Spider biofilm repressed	0.352
orf19.1471	COX4	Putative cytochrome c oxidase subunit IV; Mig1-regulated; macrophage/pseudohyphal-induced gene; macrophage-induced protein; repressed by nitric oxide; 5'-UTR intron; Hap43-repressed	0.35175
orf19.1473	orf19.1473	2-hydroxyacid dehydrogenase domain-containing protein; Hap43-repressed gene; induced by alpha pheromone in SpiderM medium	0.3515
orf19.1474	SLA1	Protein required for assembly of the cortical actin cytoskeleton; contains three SH3 domains; transcription is regulated by Nrg1 and Mig1; flow model biofilm repressed	0.35125
orf19.1476	orf19.1476	Ortholog(s) have mRNA (N6-adenosine)-methyltransferase activity, role in mRNA methylation, meiosis, negative regulation of pseudohyphal growth and MIS complex localization	0.35075
orf19.1477	orf19.1477	Protein of unknown function; possible ER protein; Hap43p-repressed; Spider biofilm induced	0.3505
orf19.1478	STT3	Putative oligosaccharyltransferase complex component; flow model and rat catheter biofilm repressed	0.3505
orf19.1479	orf19.1479	Ortholog of the mitochondria localized S. cerevisiae Pib2 protein of unknown function; has a FYVE zinc finger domain; Spider biofilm induced	0.3505
orf19.1480	orf19.1480	Putative succinate dehydrogenase; enzyme of citric acid cycle; repressed by nitric oxide; Efg1, Hap43 repressed	0.34975
orf19.1481	HAP42	Predicted transcription factor; possibly an essential gene, disruptants not obtained by UAU1 method	0.3495
orf19.1482	HSK3	Subunit of the Dam1 (DASH) complex, which acts in chromosome segregation by coupling kinetochores to spindle microtubules; expression regulated during planktonic growth	0.3495
orf19.1483	orf19.1483	Ortholog(s) have copper ion binding activity, role in mitochondrial respiratory chain complex IV assembly and extrinsic to mitochondrial inner membrane, mitochondrial intermembrane space localization	0.34775
orf19.1484	orf19.1484	Ortholog of S, cerevisiae Spc24; a component of the conserved kinetochore-associated Ndc80 complex involved in chromosome segregation, spindle checkpoint activity and kinetochore clustering; Hap43-induced gene	0.3475
orf19.1485	orf19.1485	Mitochondrial ribosomal protein of the large subunit; rat catheter biofilm induced	0.3475
orf19.1486	orf19.1486	Protein with a life-span regulatory factor domain; regulated by Sef1, Sfu1, and Hap43; flow model biofilm induced; Spider biofilm induced	0.34725
orf19.1488	orf19.1488	Ortholog of C. dubliniensis CD36 : Cd36_16630, C. parapsilosis CDC317 : CPAR2_210300, Candida tenuis NRRL Y-1498 : CANTEDRAFT_116870 and Debaryomyces hansenii CBS767 : DEHA2B04334g	0.34675
orf19.149	orf19.149	Protein of unknown function; transcript detected on high-resolution tiling arrays	0.34675
orf19.1490	MSB2	Mucin family adhesin-like protein; cell wall damage sensor; required for Cek1 phosphorylation by cell wall stress; Rim101-repressed; activation releases extracellular domain into medium; Spider biofilm induced	0.3465
orf19.1491	orf19.1491	Ortholog(s) have RNA binding activity, role in mRNA splicing, via spliceosome and U1 snRNP, U2-type prespliceosome localization	0.34625
orf19.1492	PRP39	Putative component of the U1 snRNP; involved in splicing; Hap43-induced gene; Spider biofilm induced	0.3455
orf19.1493	RAD7	Protein similar to S. cerevisiae Rad7p, which is a subunit of the Nucleotide Excision Repair Factor 4; induced under hydroxyurea treatment	0.34525
orf19.1494	RAD23	S. cerevisiae Rad23 ortholog; binds damaged DNA; Spider biofilm repressed	0.34525
orf19.1495	orf19.1495	Ortholog(s) have role in L-methionine salvage from methylthioadenosine and cytosol, nucleus localization	0.34475
orf19.1496	orf19.1496	Putative transcription factor with zinc finger DNA-binding motif; Hap43p-repressed gene	0.34425
orf19.1497	ZCF6	Putative transcription factor with zinc cluster DNA-binding motif	0.344
orf19.1499	CTF1	Putative zinc-finger transcription factor, similar to A. nidulans FarA and FarB; activates genes required for fatty acid degradation; induced by oleate; null mutant displays carbon source utilization defects and slightly reduced virulence	0.34375
orf19.150	TIM17	Predicted component of the Translocase of the Inner Mitochondrial membrane (TIM23 complex), involved in protein import into mitochondria	0.34375
orf19.1500	orf19.1500	Ortholog of C. dubliniensis CD36 : Cd36_16720, C. parapsilosis CDC317 : CPAR2_210210, Candida tenuis NRRL Y-1498 : CANTEDRAFT_128446 and Debaryomyces hansenii CBS767 : DEHA2B04092g	0.3435
orf19.1502	orf19.1502	Has domain(s) with predicted aminoacyl-tRNA hydrolase activity	0.3435
orf19.1504	orf19.1504	Putative patatin-like phospholipase; fungal-specific (no human or murine homolog)	0.3435
orf19.1505	orf19.1505	Ortholog(s) have cytoplasm localization	0.3435
orf19.1506	orf19.1506	Ortholog of Candida albicans WO-1 : CAWG_03962	0.343
orf19.1507	AMN1	Putative negative regulator of exit from mitosis; Plc1-regulated; rat catheter biofilm induced	0.34225
orf19.1508	orf19.1508	Protein of unknown function; transcript detected on high-resolution tiling arrays	0.34225
orf19.1509	ROD1	Protein similar to S. cerevisiae Rod1;a membrane protein with a role in drug tolerance; repressed by Rgt1; mutant is viable	0.3415
orf19.151	TPO5	Putative polyamine transporter; mutation confers hypersensitivity to toxic ergosterol analog; hyphal induced; macrophage induced	0.34125
orf19.1510	SRD1	Sur7 family protein with PalI-like domains; not required for stress responses; mutant is viable	0.3405
orf19.1513	FAB1	Phosphatidylinositol 3-phosphate 5-kinase; required for hyphal growth on solid media, and for wild-type vacuolar morphology and acidification; not required for wild-type virulence in mouse systemic infection or for adherence to HeLa cells	0.34025
orf19.1514	orf19.1514	Ortholog(s) have enzyme binding, phosphatidylinositol-4-phosphate binding activity and role in endoplasmic reticulum unfolded protein response, protein localization to Golgi apparatus, retrograde vesicle-mediated transport, Golgi to ER	0.34
orf19.1515	CHT4	Chitinase; similar to S. cerevisiae sporulation-specific Cts2p; functionally complements A. gossypii cts2 mutant sporulation defect; homozygous null mutation causes no obvious defects; transcription decreases upon yeast-to-hyphal switch	0.33975
orf19.1516	orf19.1516	Ortholog(s) have ubiquitin-specific protease activity	0.33925
orf19.1517	ARO3	3-deoxy-D-arabinoheptulosonate-7-phosphate synthase; aromatic amino acid synthesis; GCN-regulated; feedback-inhibited by phe if expressed in S. cerevisiae; decreased in stationary phase; flow model biofilm repressed	0.339
orf19.1519	orf19.1519	Protein of unknown function; Hap43-repressed gene	0.338
orf19.1522	orf19.1522	Ortholog of C. dubliniensis CD36 : Cd36_16850, C. parapsilosis CDC317 : CPAR2_211990, Candida tenuis NRRL Y-1498 : cten_CGOB_00169 and Debaryomyces hansenii CBS767 : DEHA2G03036g	0.3375
orf19.1523	FMO1	Putative oxidoreductase; mutation confers hypersensitivity to toxic ergosterol analog, and to amphotericin B	0.3365
orf19.1524	SPR3	Septin; mutant has no obvious phenotype	0.336
orf19.1525	orf19.1525	Ortholog(s) have role in nuclear-transcribed mRNA catabolic process, nonsense-mediated decay and cytoplasm, nucleus localization	0.3355
orf19.1526	SNF2	Protein involved in transcriptional regulation; ortholog of S. cerevisiae Snf2p, which is the catalytic subunit of the SWI/SNF chromatin remodeling complex; interacts with Swi1p; SWI/SNF complex is essential for hyphal growth and virulence	0.33525
orf19.1527	orf19.1527	Protein of unknown function; Spider biofilm induced	0.335
orf19.1528	orf19.1528	Putative mitochondrial RNA polymerase specificity factor; possibly an essential gene, disruptants not obtained by UAU1 method	0.3345
orf19.1529	orf19.1529	Protein of unknown function; macrophage-induced gene	0.3345
orf19.1530	orf19.1530	Protein of unknown function	0.33425
orf19.1531	orf19.1531	Ortholog(s) have RNA binding, protein heterodimerization activity, role in mRNA cleavage, mRNA polyadenylation and cytosol, mRNA cleavage factor complex, mitochondrion localization	0.334
orf19.1532	SAM37	Protein of the mitochondrial outer membrane, component of the Sorting and Assembly Machinery (SAM) involved in insertion of proteins into the outer membrane; mutants show loss of mtDNA	0.3335
orf19.1533	orf19.1533	Possible vacuolar protein; Hap43-induced gene	0.3335
orf19.1534	orf19.1534	Ortholog of S. cerevisiae Zrt3, vacuolar membrane zinc transporter; predicted Kex2 substrate; induced in oralpharyngeal candidasis; flow model biofilm induced; Spider biofilm induced	0.3335
orf19.1535	orf19.1535	Protein of unknown function; Hap43-induced gene	0.33225
orf19.1536	orf19.1536	Putative vacuolar transporter; Hap43-induced; required for normal filamentous growth; mRNA binds She3 and is localized to hyphal tips	0.332
orf19.1538	TLG2	Putative syntaxin-like t-SNARE; macrophage/pseudohyphal-repressed	0.332
orf19.1539	orf19.1539	Protein of unknown function; F-12/CO2 early biofilm induced	0.3315
orf19.154	orf19.154	Putative ortholog of S. cerevisiae Utp30; a U3-containing 90S preribosome complex protein; Hap43-induced; Spider biofilm induced	0.33125
orf19.1541	orf19.1541	Protein with a globin-like domain; repressed by alpha pheromone in SpiderM medium; Spider biofilm induced	0.331
orf19.1542	HEX3	Protein similar to S. cerevisiae Hex3p, which is involved in DNA damage response; transposon mutation affects filamentous growth	0.33025
orf19.1543	OPI1	Leucine zipper transcription factor; repressor of INO1 involved in inositol biosynthesis; functional homolog of S. cerevisiae Opi1; has putative Opi1-Sin3 interaction domain; interacts with ScSin3, but not CaSin3	0.33
orf19.1544	orf19.1544	Putative cis-golgi localized protein involved in ER to Golgi transport; Spider biofilm repressed	0.3295
orf19.1545	orf19.1545	Ortholog(s) have structural constituent of ribosome activity and mitochondrial small ribosomal subunit localization	0.3295
orf19.1546	orf19.1546	Membrane-localized protein of unknown function	0.32875
orf19.1547	orf19.1547	Ortholog(s) have double-stranded DNA binding, polynucleotide 3'-phosphatase activity and role in double-strand break repair	0.3285
orf19.1548	orf19.1548	Ortholog(s) have role in mRNA splicing, via spliceosome and U4/U6 x U5 tri-snRNP complex localization	0.3285
orf19.1549	orf19.1549	Plasma membrane-associated protein identified in detergent-resistant membrane fraction (possible lipid raft component); repressed by nitric oxide; predicted transmembrane helix	0.32825
orf19.155	URE2	Functional homolog of S. cerevisiae Ure2p, which is a regulator of nitrogen utilization, and which also has an infectious prion form called [URE3]; forms [URE3] prion when expressed in S. cerevisiae	0.3265
orf19.1551	orf19.1551	Predicted protein of unknown function; overlaps CPR3/orf19.1552	0.3265
orf19.1552	CPR3	Putative peptidyl-prolyl cis-trans isomerase; macrophage-induced protein; protein levels decrease in stationary phase yeast cultures; predicted mitochondrial localization; overlaps orf19.1551	0.32625
orf19.1553	ENT3	Putative epsin; induced during the mating process; transcript is upregulated in an RHE model of oral candidiasis	0.32625
orf19.1555	SAC3	Putative nuclear pore-associated protein, required for small ribosomal subunit biogenesis; possibly an essential gene, disruptants not obtained by UAU1 method	0.3255
orf19.1557	orf19.1557	Ortholog(s) have S-adenosylmethionine-dependent methyltransferase activity, role in protein methylation and cytosol, nucleus localization	0.325
orf19.1559	HOM2	Aspartate-semialdehyde dehydrogenase; forms a homodimer; conserved in bacteria, archaea, and fungi but not in mammals; ketoconazole-repressed; protein present in exponential and stationary growth phase yeast cultures; GlcNAc-induced protein	0.32425
orf19.156	FGR51	Protein lacking an ortholog in S. cerevisiae; transposon mutation affects filamentous growth; Hap43p-repressed gene	0.32375
orf19.1560	POB3	Protein involved in chromatin assembly and disassembly; ortholog of S. cerevisiae Pob3; transposon mutation affects filamentous growth; rat catheter biofilm repressed	0.3225
orf19.1562	orf19.1562	Protein of unknown function; flow model biofilm induced; Spider biofilm induced; repressed by alpha pheromone in SpiderM medium	0.3225
orf19.1563	ECM3	Ortholog(s) have endoplasmic reticulum localization	0.321
orf19.1564	orf19.1564	Plasma membrane-localized protein of unknown function	0.32075
orf19.1565	orf19.1565	Protein of unknown function	0.32
orf19.1566	UTP21	Putative U3 snoRNP protein; Hap43-induce; physically interacts with TAP-tagged Nop1; Spider biofilm induced	0.3195
orf19.1567	orf19.1567	Ortholog(s) have Rab guanyl-nucleotide exchange factor activity, phosphatidylinositol binding activity	0.3195
orf19.1569	UTP22	Putative U3 snoRNP protein; Ssr1-induced; repressed by prostaglandins; heterozygous null mutant is resistant to parnafungin	0.3195
orf19.1570	ERG7	2,3-epoxysqualene-lanosterol cyclase (lanosterol synthase), conversion of 2,3-oxidosqualene to lanosterol in sterol biosynthesis; fluconazole-induced; possibly essential, disruptants not obtained by UAU1 method; rat catheter biofilm induced	0.3195
orf19.1571	ATO7	Putative fungal-specific transmembrane protein	0.3185
orf19.1573	orf19.1573	Ortholog(s) have endoplasmic reticulum, fungal-type vacuole membrane localization	0.3185
orf19.1574	orf19.1574	Putative TFIID subunit involved in RNA polymerase II transcription initiation; possibly an essential gene, disruptants not obtained by UAU1 method	0.3185
orf19.1575	PRS1	Phosphoribosylpyrophosphate synthetase; enzyme of purine, pyrimidine, histidine, and tryptophan biosynthesis; essential; flucytosine induced; macrophage/pseudohyphal-induced	0.3185
orf19.1576	orf19.1576	Ortholog(s) have nuclear localization sequence binding, ubiquitin binding activity, role in response to ethanol and cytosol localization	0.31825
orf19.1577	orf19.1577	Has domain(s) with predicted sequence-specific DNA binding, sequence-specific DNA binding transcription factor activity, zinc ion binding activity and role in regulation of transcription, DNA-dependent	0.318
orf19.1578	orf19.1578	Ortholog of S. cereviaie Rrp5, an RNA binding protein involved in synthesis of 18S and 5.8S rRNAs; Hap43-induced gene	0.31775
orf19.158	orf19.158	Ortholog of S. cerevisiae Apd1; required for normal localization of actin patches and normal tolerance of sodium ions and hydrogen peroxide; Hap43-induced; Spider biofilm induced	0.317
orf19.1580	orf19.1580	Protein of unknown function; Spider biofilm induced	0.317
orf19.1581	orf19.1581	Planktonic growth-induced gene	0.3155
orf19.1582	orf19.1582	Predicted membrane transporter; member of the drug:proton antiporter (12 spanner) (DHA1) family, major facilitator superfamily (MFS); mRNA binds She3	0.315
orf19.1584	orf19.1584	Predicted MFS membrane transporter; monocarboxylate porter family member; colony morphology-related gene regulation by Ssn6; flow model biofilm induced; Spider biofilm induced	0.315
orf19.1585	ZRT2	Zinc transporter; ciclopirox olamine, fluconazole, alkaline repressed; transcript induced by amphotericin B, interaction with macrophages; possibly essential (UAU1 method); induced in oralpharyngeal candidiasis; Spider biofilm induced	0.315
orf19.1586	FGR22	Putative phosphatidylinositol-specific phospholipase C (PI-PLC); predicted type 2 membrane protein; no S. cerevisiae ortholog; role in, and regulated by, filamentation, Hap43p; almost identical to orf19.5797	0.31475
orf19.1587	HGT20	Putative glucose transporter of the major facilitator superfamily; the C. albicans glucose transporter family comprises 20 members; 12 probable membrane-spanning segments; regulated by Nrg1	0.31425
orf19.1588	orf19.1588	Putative mitochondrial protein of unknown function; regulated by Sef1p-, Sfu1p-, and Hap43p	0.31425
orf19.1589	orf19.1589	Putative transcription factor component of the core factor (CF) rDNA transcription factor complex; Spider biofilm induced	0.3135
orf19.1590	orf19.1590	Ortholog of C. dubliniensis CD36 : Cd36_18970, C. parapsilosis CDC317 : CPAR2_212800, Debaryomyces hansenii CBS767 : DEHA2F08690g and Candida guilliermondii ATCC 6260 : PGUG_01488	0.3135
orf19.1591	ERG10	Acetyl-CoA acetyltransferase; role in ergosterol biosynthesis; soluble in hyphae; changes in protein abundance associated with azole resistance; fluconazole or ketoconazole induced; macrophage-downregulated protein; GlcNAc-induced protein	0.313
orf19.1592	orf19.1592	Protein of unknown function; Spider biofilm induced	0.313
orf19.1595	orf19.1595	Ortholog(s) have Dsc E3 ubiquitin ligase complex, endoplasmic reticulum localization	0.31275
orf19.1596	FGR28	Protein lacking an ortholog in S. cerevisiae; transposon mutation affects filamentous growth; possibly an essential gene, disruptants not obtained by UAU1 method	0.31275
orf19.1597	ABG1	Vacuolar membrane protein; depletion causes abnormal vacuolar morphology, cell separation defect, sensitivity to cell wall stress, increased hyphal branching; essential, no mammalian homolog; Cyr1-regulated; rat catheter biofilm repressed	0.3115
orf19.1598	ERG24	C-14 sterol reductase, has a role in ergosterol biosynthesis; mutation confers increased sensitivity to dyclonine; rat catheter and Spider biofilm repressed	0.3115
orf19.1599	orf19.1599	Ortholog of Candida albicans WO-1 : CAWG_06018	0.3115
orf19.1600	orf19.1600	Ortholog of C. dubliniensis CD36 : Cd36_23530, C. parapsilosis CDC317 : CPAR2_406140, Candida tenuis NRRL Y-1498 : CANTEDRAFT_116829 and Debaryomyces hansenii CBS767 : DEHA2B01826g	0.311
orf19.1601	RPL3	Ribosomal protein, large subunit; induced by ciclopirox olamine treatment; genes encoding cytoplasmic ribosomal subunits are downregulated upon phagocytosis by murine macrophages; Hap43-induced gene; Spider biofilm repressed	0.3105
orf19.1604	orf19.1604	Predicted Gal4-like DNA-binding transcription factor; Spider biofilm induced	0.3105
orf19.1605	PMS1	Putative DNA mismatch repair factor; ortholog of S. cerevisiae PMS1 which is an ATP-binding protein involved in DNA mismatch repair	0.31
orf19.1606	orf19.1606	Protein of unknown function; Plc1-regulated	0.30975
orf19.1607	ALR1	Putative transporter of divalent cations; hyphal-induced expression; rat catheter biofilm induced	0.30975
orf19.1608	orf19.1608	Ortholog(s) have cytosol, nucleus localization	0.30975
orf19.1609	orf19.1609	Ortholog(s) have role in endonucleolytic cleavage in ITS1 to separate SSU-rRNA from 5.8S rRNA and LSU-rRNA from tricistronic rRNA transcript (SSU-rRNA, 5.8S rRNA, LSU-rRNA) and mitotic spindle pole body, nucleolus localization	0.30975
orf19.1610	orf19.1610	Putative protein of unknown function, transcription is activated in the presence of elevated CO2	0.3095
orf19.1611	orf19.1611	Protein of unknown function; Spider biofilm induced	0.3095
orf19.1613	ILV2	Putative acetolactate synthase; regulated by Gcn4p; induced by amino acid starvation (3-AT treatment); stationary phase enriched protein	0.309
orf19.1614	MEP1	Ammonium permease; Mep1 more efficient permease than Mep2, Mep2 has additional regulatory role; 11 predicted transmembrane regions; low mRNA abundance; hyphal downregulated; flow model biofilm induced	0.309
orf19.1616	FGR23	Protein of unknown function; repressed by a1/alpha2 in white-phase cells, a-specific, alpha factor-induced; Hap43-repressed; flow model biofilm induced; Tn mutation affects filamentous growth;	0.30875
orf19.1617	orf19.1617	Protein similar to S. cerevisiae Ydr282cp; transposon mutation affects filamentous growth; Hap43p-repressed gene	0.30875
orf19.1618	GFA1	Glucosamine-6-phosphate synthase, homotetrameric enzyme of chitin/hexosamine biosynthesis; inhibited by UDP-GlcNAc, FMDP, N-acyl peptide, kanosamine-6-P; functional homolog of S. cerevisiae Gfa1p; Cagrowth-phase regulated; catalytic Cys	0.3085
orf19.1619	orf19.1619	Putative kinase subunit of RNA polymerase II carboxy-terminal domain kinase I; possibly an essential gene, disruptants not obtained by UAU1 method	0.308
orf19.1620	orf19.1620	Protein of unknown function; induced by alpha pheromone in SpiderM medium	0.30775
orf19.1621	GPA2	G-protein alpha subunit; regulates filamentous growth, copper resistance; involved in cAMP-mediated glucose signaling; reports differ on role in cAMP-PKA pathway, MAP kinase cascade; Gpr1 C terminus binds Gpa2; regulates HWP1 and ECE1	0.3075
orf19.1622	YCG1	Putative condensin G	0.307
orf19.1623	CAP1	AP-1 bZIP transcription factor; apoptotic, oxidative stress response/resistance, multidrug resistance; nuclear in oxidative stress; complements S. cerevisiae yap1 mutant; oralpharyngeal candidasis-, human neutrophil, Spider biofilm induced	0.307
orf19.1624	orf19.1624	Non-catalytic subunit of N-terminal acetyltransferase of the NatC type; flow model biofilm repressed	0.307
orf19.1625	orf19.1625	Putative ubiquinone oxidoreductase; repressed by nitric oxide; Hap43p-repressed	0.30675
orf19.1626	orf19.1626	Deoxyhypusine synthase; catalyzes formation of deoxyhypusine, the first step in hypusine biosynthesis; Spider biofilm repressed	0.30575
orf19.1628	LAP41	Putative aminopeptidase yscI precursor; mutant is viable; protein present in exponential and stationary growth phase yeast cultures; Spider biofilm repressed	0.30525
orf19.163	PAN6	Ortholog(s) have pantoate-beta-alanine ligase activity, role in pantothenate biosynthetic process and cytosol, nucleus localization	0.30475
orf19.1630	orf19.1630	Ortholog(s) have cytoplasm localization	0.30475
orf19.1631	ERG6	Delta(24)-sterol C-methyltransferase, converts zymosterol to fecosterol, ergosterol biosynthesis; mutation confers nystatin resistance; Hap43, GlcNAc-, fluconazole-induced; upregulated in azole-resistant strain; Spider biofilm repressed	0.3045
orf19.1632	orf19.1632	Ortholog(s) have cytosol, nucleus localization	0.304
orf19.1633	UTP4	Putative U3 snoRNA-associated protein; Hap43-induced; physically interacts with TAP-tagged Nop1; Spider biofilm induced	0.304
orf19.1634	orf19.1634	Has domain(s) with predicted fatty-acyl-CoA binding activity	0.304
orf19.1635	RPL12	Ribosomal protein L12, 60S ribosomal subunit; downregulated by human whole blood or polymorphonuclear cells; genes encoding cytoplasmic ribosomal subunits are downregulated upon phagocytosis by macrophage; Tbf1p-activated; Hap43p-induced	0.30375
orf19.1636	STE50	Protein with sterile alpha motif (SAM) and Ras-associated domain (RAD); similar to S. cerevisiae Rad50p, which is involved in signal transduction via interaction with and regulation of MAPKKK	0.3035
orf19.1637	orf19.1637	Ortholog(s) have cytosol, nucleus localization	0.302
orf19.1638	orf19.1638	Has domain(s) with predicted zinc ion binding activity, role in ER to Golgi vesicle-mediated transport, intracellular protein transport and COPII vesicle coat localization	0.30175
orf19.1639	orf19.1639	Has domain(s) with predicted oxidoreductase activity and role in oxidation-reduction process	0.30175
orf19.164	orf19.164	Ortholog(s) have lipase activity and peroxisomal matrix localization	0.30175
orf19.1641	orf19.1641	Ortholog(s) have cytosol, extracellular region, nucleus localization	0.301
orf19.1642	orf19.1642	Ortholog of S. cerevisiae Loc1, a nuclear protein involved in asymmetric localization of ASH1 mRNA in S. cerevisiae; Hap43-induced gene; Spider biofilm induced	0.30075
orf19.1643	orf19.1643	Ortholog(s) have serine-type endopeptidase activity, role in regulation of mitochondrion organization, signal peptide processing and mitochondrial inner membrane localization	0.30075
orf19.1646	orf19.1646	Ortholog(s) have rRNA primary transcript binding activity	0.3005
orf19.1647	orf19.1647	Ortholog(s) have role in ascospore wall assembly	0.3005
orf19.1648	RAD50	Putative DNA double-strand break repair factor; involved in response to oxidative stress and drug resistance; flow model biofilm repressed	0.29975
orf19.1649	RNA1	Putative GTPase-activating protein; protein level decreases in stationary phase cultures; Spider biofilm repressed	0.29975
orf19.1650	TOM6	Predicted component of the TOM (translocase of outer membrane) complex, involved in protein import into mitochondria	0.2995
orf19.1651	orf19.1651	Ortholog of C. dubliniensis CD36 : Cd36_81960, Pichia stipitis Pignal : psti_CGOB_00163, Candida tropicalis MYA-3404 : CTRG_02378 and Candida albicans WO-1 : CAWG_02525	0.2995
orf19.1652	POX1-3	Predicted acyl-CoA oxidase; farnesol regulated; stationary phase enriched protein; Spider biofilm induced	0.29925
orf19.1653	orf19.1653	Has domain(s) with predicted integral to membrane localization	0.299
orf19.1654	orf19.1654	Predicted membrane protein; induced by prostaglandins	0.299
orf19.1655	PXP2	Putative acyl-CoA oxidase; enzyme of fatty acid beta-oxidation; induced during macrophage infection; opaque specific transcript; putative peroxisome targeting signal; Spider biofilm induced	0.29875
orf19.1655.3	orf19.1655.3	Ortholog(s) have role in cation transport, regulation of membrane potential and plasma membrane localization	0.2985
orf19.1656	orf19.1656	Protein with a predicted FYVE/PHD zinc finger domain; Hap43-repressed; Spider biofilm induced	0.2985
orf19.1658	orf19.1658	Ortholog(s) have cell cortex, cellular bud neck, cellular bud tip, mating projection tip localization	0.298
orf19.1659	ALG8	Putative glucosyltransferase involved in cell wall mannan biosynthesis; transcription is elevated in nik1 and sln1 homozygous null mutants, but not in the chk1 null mutant; possibly an essential gene, disruptants not obtained by UAU1 method	0.29725
orf19.166	ASG1	Gal4p family zinc-finger transcription factor with similarity to S. cerevisiae Asg1p	0.297
orf19.1661	DBP5	Ortholog(s) have RNA helicase activity, RNA-dependent ATPase activity, inositol hexakisphosphate binding activity and role in mRNA export from nucleus, translational termination	0.29675
orf19.1662	orf19.1662	Ortholog(s) have structural constituent of ribosome activity and mitochondrial small ribosomal subunit localization	0.2965
orf19.1663	MNT2	Alpha-1,2-mannosyl transferase; adds 3rd mannose in cell-wall mannoprotein biosynthesis; partially redundant with Mnt1; role in adherence and virulence; expressed in yeast and hyphae; fungal-specific; Hap43-induced; Spider biofilm induced	0.296
orf19.1664	orf19.1664	Protein of unknown function; expression downregulated in an ssr1 null mutant	0.296
orf19.1665	MNT1	Alpha-1,2-mannosyl transferase; predicted type II Golgi membrane protein; adds 2nd mannose during cell-wall mannoprotein biosynthesis; required for wild-type virulence and adherence to epithelial cells; Hap43-induced	0.29575
orf19.1666	orf19.1666	Ortholog of Dig2, a MAP kinase-responsive inhibitor of Ste12; regulates mating-specific genes and invasive growth in S. cerevisiae; induced by alpha pheromone in SpiderM medium	0.2955
orf19.1667	orf19.1667	Protein with a predicted SWI/SNF-related matrix-associated actin-dependent regulator of chromatin subfamily domain; Hap43-repressed gene	0.2955
orf19.1667.1	orf19.1667.1	Ortholog(s) have role in mitochondrial respiratory chain complex IV assembly and mitochondrial intermembrane space, nucleus localization	0.2955
orf19.1668	orf19.1668	Protein of unknown function; expression downregulated in an ssr1 null mutant	0.2955
orf19.1669	AFG3	Similar to S. cerevisiae Afg3p, a subunit of the mitochondrial inner membrane m-AAA protease; likely to be essential for growth, based on an insertional mutagenesis strategy	0.2955
orf19.1670	BRO1	Class E vacuolar protein sorting factor; role in transport from multivesicular body to vacuole; not involved in Rim101 pathway; macrophage and pseudohyphal-repressed; flow model biofilm induced	0.2955
orf19.1671	UTR2	Putative GPI anchored cell wall glycosidase; role in adhesion, hyphal growth on Spider (not serum) medium; chitin-binding, glycosyl hydrolase domains; induced during cell wall regeneration; mRNA in yeast-form cells; Spider biofilm induced	0.2945
orf19.1672	orf19.1672	Alpha subunit of COPI vesicle coatomer complex; role in ER to Golgi vesicle-mediated transport, retrograde vesicle-mediated transport, Golgi to ER transport; flow model biofilm repressed	0.2945
orf19.1673	PPT1	Putative serine/threonine phosphatase; induced in high iron	0.2945
orf19.1674	CDC53	Cullin, a scaffold subunit of the SCF ubiquitin-ligase complexes; depletion leads to increased filamentous growth and premature cell death	0.29425
orf19.1675	orf19.1675	Ortholog(s) have role in positive regulation of catalytic activity	0.2935
orf19.1676	orf19.1676	Predicted potassium ion transporter; Spider biofilm induced	0.2935
orf19.1677	orf19.1677	Protein of unknown function; transcript detected on high-resolution tiling arrays	0.2935
orf19.1678	orf19.1678	Protein of unknown function; transcript detected on high-resolution tiling arrays	0.29325
orf19.1679	orf19.1679	Ortholog of C. dubliniensis CD36 : Cd36_81550, C. parapsilosis CDC317 : CPAR2_503570, Candida tenuis NRRL Y-1498 : cten_CGOB_00261 and Debaryomyces hansenii CBS767 : DEHA2D15378g	0.293
orf19.168	orf19.168	Ortholog(s) have role in U4 snRNA 3'-end processing, exonucleolytic trimming to generate mature 3'-end of 5.8S rRNA from tricistronic rRNA transcript (SSU-rRNA, 5.8S rRNA and LSU-rRNA), more	0.29275
orf19.1680	TFP1	Subunit of vacuolar H+-ATPase; stationary phase enriched protein; sumoylation target; Spider biofilm repressed	0.29275
orf19.1681	orf19.1681	Ortholog of C. dubliniensis CD36 : Cd36_81530, C. parapsilosis CDC317 : CPAR2_503590, Candida tenuis NRRL Y-1498 : CANTEDRAFT_115755 and Debaryomyces hansenii CBS767 : DEHA2D15334g	0.2925
orf19.1682	orf19.1682	Membrane protein; Hap43p-repressed gene; repressed by nitric oxide	0.2925
orf19.1683	PPH21	Putative protein phosphatase of the Type 2A-related family (serine/threonine-specific), similar to S. cerevisiae Pph21p; caspofungin repressed; possibly an essential gene, disruptants not obtained by UAU1 method	0.2925
orf19.1684	orf19.1684	Ortholog of C. dubliniensis CD36 : Cd36_81500, C. parapsilosis CDC317 : CPAR2_503620, Candida tenuis NRRL Y-1498 : CANTEDRAFT_93693 and Debaryomyces hansenii CBS767 : DEHA2D15268g	0.29225
orf19.1685	ZCF7	Predicted Zn(II)2Cys6 transcription factor; mutant shows reduced colony wrinkling on Spider medium and is unable to utilize mannitol as a carbon source; mutants have increased colonization of mouse kidneys	0.29175
orf19.1686	orf19.1686	Ortholog(s) have mitochondrion localization	0.2915
orf19.1687	orf19.1687	Ortholog of S. cerevisiae Prp43, an RNA helicase in the DEAH-box family that functions in both RNA polymerase I and polymerase II transcript metabolism; Hap43-induced gene	0.29125
orf19.169	CHO2	Putative phosphatidyl-ethanolamine N-methyltransferase; fungal-specific (no human or murine homolog); amphotericin B repressed; Hap43p-induced gene	0.29125
orf19.1690	TOS1	Protein similar to alpha agglutinin anchor subunit; secreted; exogenously expressed protein is a substrate for Kex2 processing in vitro; fluconazole-induced; induced by alpha pheromone in SpiderM medium; Hap43-induced	0.291
orf19.1691	orf19.1691	Plasma-membrane-localized protein; filament induced; Hog1, ketoconazole, fluconazole and hypoxia-induced; regulated by Nrg1, Tup1, Upc2; induced by prostaglandins; flow model biofilm induced; rat catheter and Spider biofilm repressed	0.2905
orf19.1693	CAS4	RAM cell wall integrity signaling network protein; cell separation, azole sensitivity; needed for hyphal growth; insertion mutation near 3' end of gene increases caspofungin sensitivity; pheromone/hyphal induced; flow biofilm repressed	0.29025
orf19.1697	orf19.1697	Ortholog(s) have role in cytoplasmic translation and cytoplasm, polysomal ribosome localization	0.28975
orf19.1698	orf19.1698	Ortholog(s) have phosphatidate phosphatase activity, role in actin cytoskeleton organization, cellular lipid metabolic process and actin cortical patch localization	0.28975
orf19.1699	BZZ1	Protein similar to S. cerevisiae Bzz1p, which is an SH3 domain protein involved in the regulation of actin polymerization	0.2895
orf19.17	SCP1	Putative cortical actin cytoskeleton protein; constitutive expression independent of MTL or white-opaque status	0.28925
orf19.1700	RPS7A	Ribosomal protein S7; genes encoding cytoplasmic ribosomal subunits, translation factors, and tRNA synthetases are downregulated upon phagocytosis by murine macrophage; Spider biofilm repressed	0.28925
orf19.1701	RKI1	Ortholog(s) have ribose-5-phosphate isomerase activity, role in pentose-phosphate shunt, pyridoxine biosynthetic process and cytoplasm, nucleus localization	0.28925
orf19.1702	ARF3	Similar to but not orthologous to S. cerevisae Arf3; transcript filament induced; Tup1 regulated; rat catheter biofilm repressed (see Locus History Note for Assembly 19 correction)	0.289
orf19.1704	FOX3	Putative peroxisomal 3-oxoacyl CoA thiolase; transcript regulated by white-opaque switch; Spider biofilm induced	0.28875
orf19.1706	MET18	Putative protein with a predicted role in nucleotide excision repair (NER) and RNA polymerase II (RNAP II) transcription; Plc1p-regulated	0.28875
orf19.1707	orf19.1707	Ortholog of Candida albicans WO-1 : CAWG_02476	0.2885
orf19.1708	orf19.1708	Protein of unknown function; Spider biofilm induced	0.2875
orf19.1709	orf19.1709	Sterol carrier domain protein; alkaline downregulated; colony morphology-related gene regulation by Ssn6; Spider biofilm induced	0.28725
orf19.171	DBP2	Putative DEAD-box family ATP-dependent RNA helicase; flucytosine induced; repressed in core stress response	0.28725
orf19.1710	ALI1	Putative NADH-ubiquinone oxidoreductase; in detergent-resistant membrane fraction (possible lipid raft component); predicted N-terminal acetylation; nitric oxide-repressed; plasma membrane-localized; protein decreases in stationary phase	0.28675
orf19.1711	END3	Regulated by Gcn4p; induced in response to amino acid starvation (3-aminotriazole treatment)	0.2865
orf19.1712	GEA2	Putative ARF GTP/GDP exchange factor; induced in low iron; flow model biofilm repressed	0.28625
orf19.1714	PGA44	Putative GPI-anchored protein	0.28625
orf19.1715	IRO1	Putative transcription factor; role in iron utilization, pathogenesis; both IRO1 and adjacent URA3 are mutated in strain CAI4; suppresses S. cerevisiae aft1 mutant low-iron growth defect; hyphal-induced; reports differ about iron regulation	0.286
orf19.1716	URA3	Orotidine-5'-phosphate decarboxylase; pyrimidine biosynthesis; gene used as genetic marker; decreased expression when integrated at ectopic chromosomal locations can cause defects in hyphal growth and virulence; Spider biofilm repressed	0.28575
orf19.1717	orf19.1717	Ortholog of C. dubliniensis CD36 : Cd36_81270, C. parapsilosis CDC317 : CPAR2_502880, Candida tenuis NRRL Y-1498 : CANTEDRAFT_101483 and Debaryomyces hansenii CBS767 : DEHA2A11990g	0.285
orf19.1718	ZCF8	Predicted Zn(II)2Cys6 transcription factor; repressed by fluphenazine treatment; required for yeast cell adherence to silicone substrate	0.285
orf19.1719	SGA1	Putative glucoamylase; induced in oralpharyngeal candidasis; rat catheter and Spider biofilm induced	0.285
orf19.172	RPC19	Putative RNA polymerases I and III subunit AC19; Hap43-induced; rat catheter biofilm induced	0.28475
orf19.1720	orf19.1720	Ortholog(s) have role in mitotic recombination	0.28425
orf19.1721	NCE103	Carbonic anhydrase; converts of CO2 to bicarbonate; essential for virulence in host niches with limited CO2, normal white-opaque switch; Mnl1-induced in weak acid stress; Hap43-induced gene; F-12/CO2, rat catheter, Spider biofilm induced	0.28425
orf19.1722	orf19.1722	Ortholog of Candida albicans WO-1 : CAWG_02462	0.283
orf19.1723	orf19.1723	Ortholog(s) have role in response to purine-containing compound and cytoplasm, nucleus localization	0.28275
orf19.1724	orf19.1724	Protein of unknown function; induced by nitric oxide independent of Yhb1p	0.2825
orf19.1725	orf19.1725	Putative adhesin-like protein	0.28225
orf19.1727	PMC1	Vacuolar calcium P-type ATPase; transcript regulated by calcineurin and fluconazole; mutant shows increased resistance to fluconazole, lithium; increased sensitivity to calcium; Spider biofilm induced	0.282
orf19.1728	orf19.1728	Ortholog of C. dubliniensis CD36 : Cd36_81190, C. parapsilosis CDC317 : CPAR2_503840, Debaryomyces hansenii CBS767 : DEHA2A09042g and Pichia stipitis Pignal : PICST_42519	0.28125
orf19.1729	orf19.1729	Putative transcription factor with zinc finger DNA-binding motif	0.281
orf19.173	orf19.173	C2H2 transcription factor; induced by Mnl1 under weak acid stress	0.28075
orf19.1730	orf19.1730	HMG-box protein; Spider biofilm repressed	0.2805
orf19.1734	orf19.1734	Putative ATPase and nucleosome spacing factor; heterozygous null mutant displays sensitivity to virgineone	0.2805
orf19.1735	orf19.1735	Ortholog(s) have U2-type spliceosomal complex localization	0.28
orf19.1736	orf19.1736	Protein of unknown function; transcript detected on high-resolution tiling arrays	0.28
orf19.1737	orf19.1737	Ortholog of Candida albicans WO-1 : CAWG_01802	0.2795
orf19.1738	UGP1	UTP-glucose-1-phosphaturidyl transferase; localizes to yeast, not hyphal cell surface; Hog1-repressed; stationary phase enriched; induced in oralpharyngeal candidasis; rat catheter biofilm repressed; Bcr1-repressed in RPMI a/a biofilms	0.2795
orf19.1738.1	orf19.1738.1	Protein involved in microtubule morphogenesis; required for protection from excess free beta-tubulin; possibly involved the beta-tubulin folding; Spider biofilm repressed	0.2785
orf19.1741	DIT1	Ortholog(s) have catalytic activity and role in ascospore wall assembly	0.27825
orf19.1742	HEM3	Hydroxymethylbilane synthase; converts 4-porphobilinogen to hydroxymethylbilane in heme biosynthesis; induced in high iron, CO2; alkaline repressed; regulated by Sef1, Sfu1, and Hap43; rat catheter and Spider biofilm induced	0.278
orf19.1743	ACS1	Acetyl-CoA synthetase; induced by human neutrophils; fluconazole-repressed; regulated by Nrg1/Mig1; colony morphology-related gene regulation by Ssn6; only in stationary phase cultures; rat catheter biofilm repressed, Spider biofilm induced	0.27675
orf19.1744	HEM4	Putative uroporphyrinogen III synthase; induced in high iron or elevated CO2; alkaline, Hap43-repressed	0.2765
orf19.1745	orf19.1745	Protein of unknown function; Hap43-repressed gene	0.27625
orf19.1746	orf19.1746	Protein similar to S. cerevisiae meiosis-specific, spore-wall-localized protein Ssp2p, which is required for wild-type outer spore wall formation in S. cerevisiae; possibly an essential gene (UAU1 method); Hap43p-repressed	0.276
orf19.1747	KIP2	Putative kinesin-related motor protein involved in mitotic spindle positioning; repressed by alpha pheromone in SpiderM medium; periodic mRNA expression, peak at cell-cycle G2/M phase	0.276
orf19.1748	orf19.1748	Protein of unknown function; shows colony morphology-related gene regulation by Ssn6	0.2755
orf19.175	orf19.175	Ortholog of C. dubliniensis CD36 : Cd36_27430, C. parapsilosis CDC317 : CPAR2_802450, Candida tenuis NRRL Y-1498 : CANTEDRAFT_113969 and Debaryomyces hansenii CBS767 : DEHA2A13002g	0.2755
orf19.1750	SLR1	Protein similar to mammalian SR-like RNA splicing factor; involved in filamentous growth and virulence; gene has intron; Spider biofilm repressed	0.27475
orf19.1751	SPT23	Protein involved in regulation of unsaturated fatty acid biosynthesis; controls the expression of the Ole1p delta-9-fatty acid desaturase	0.2745
orf19.1753	PUS7	Pseudouridine synthase; catalyzes pseudouridylation in U2 snRNA, 5S rRNA, cytoplasmic tRNAs and in pre-tRNA(Tyr); F-12/CO2 early biofilm induced	0.27425
orf19.1754	orf19.1754	Putative calmodulin-dependent protein kinase; possibly an essential gene, disruptants not obtained by UAU1 method	0.27425
orf19.1755	SET2	Ortholog(s) have histone methyltransferase activity (H3-K36 specific) activity	0.274
orf19.1756	GPD1	Glycerol-3-phosphate dehydrogenase; glycerol biosynthesis; regulated by Efg1; regulated by Tsa1, Tsa1B under H2O2 stress conditions; Sflow model and Spider biofilm induced	0.274
orf19.1757	orf19.1757	Putative C2H2 transcription factor; expression upregulated in clinical isolates from HIV+ patients with oral candidiasis; Spider biofilm induced	0.274
orf19.1759	PHO23	Ortholog(s) have methylated histone residue binding activity	0.274
orf19.176	OPT4	Oligopeptide transporter; detected at germ tube plasma membrane; transcript inducede during phagocytosis by macrophages; fungal-specific; Hap43-repressed; merged with orf19.2292 in Assembly 20; rat catheter and Spider biofilm induced	0.27375
orf19.1760	RAS1	RAS signal transduction GTPase; regulates cAMP and MAP kinase pathways; role in hyphal induction, virulence, apoptosis, heat-shock sensitivity; nonessential; plasma membrane-localized; complements viability of S. cerevisiae ras1 ras2 mutant	0.27375
orf19.1761	orf19.1761	Predicted olichyl-diphosphooligosaccharide-protein glycotransferase; role in protein N-linked glycosylation; Spider biofilm repressed	0.27375
orf19.1762	OCA1	Putative protein phosphatase of the PTP family (tyrosine-specific); ortholog of S. cerevisiae Oca1; mutant is viable; mutant shows virulence defect	0.27325
orf19.1763	IFR1	Predicted oxidoreductase/dehydrogenase; induced by nitric oxide; rat catheter and Spider biofilm induced	0.27225
orf19.1764	orf19.1764	Protein of unknown function; rat catheter and Spider biofilm induced	0.272
orf19.1765	orf19.1765	Secreted protein; fluconazole-induced	0.272
orf19.1766	orf19.1766	Secreted protein; fluconazole-induced	0.27175
orf19.1767	orf19.1767	Ortholog(s) have protein complex scaffold, ubiquitin-specific protease activity, role in histone H3-K4 methylation, histone H3-K79 methylation, histone deubiquitination and DUBm complex, SAGA complex, SLIK (SAGA-like) complex localization	0.27175
orf19.1768	orf19.1768	Ortholog of C. parapsilosis CDC317 : CPAR2_407480, C. dubliniensis CD36 : Cd36_24170, Candida orthopsilosis Co 90-125 : CORT_0C06830 and Spathaspora passalidarum NRRL Y-27907 : SPAPADRAFT_65786	0.2715
orf19.1769	orf19.1769	Ortholog(s) have G-protein beta/gamma-subunit complex binding, actin binding activity, role in positive regulation of transcription from RNA polymerase II promoter by pheromones, protein folding and cytoplasm localization	0.27125
orf19.177	orf19.177	Has domain(s) with predicted phosphatidylinositol binding activity and role in cell communication	0.27075
orf19.1770	CYC1	Cytochrome c; complements defects of S. cerevisiae cyc1 cyc7 double mutant; induced in high iron; alkaline repressed; repressed by nitric oxide; Hap43-dependent repression in low iron; regulated by Sef1, Sfu1	0.2705
orf19.1771	CWC22	Predicted spliceosome-associated protein; role in pre-mRNA splicing; Spider biofilm induced	0.2705
orf19.1772	orf19.1772	Ortholog(s) have mitochondrion localization	0.27025
orf19.1773	RAP1	Transcription factor; binds telomeres and regulatory sequences in DNA; involved in telomere maintenance; represses hyphal growth under yeast-favoring conditions; similar to (but shorter than) S. cerevisiae Rap1	0.27
orf19.1774	orf19.1774	Predicted dehydrogenase; transcript upregulated in an RHE model of oral candidiasis; virulence-group-correlated expression; Spider biofilm repressed	0.27
orf19.1776	orf19.1776	Putative pantetheine-phosphate adenylyltransferase (PPAT); which catalyzes 4th step in coenzyme A biosynthesis from pantothenate; rat catheter biofilm repressed	0.26975
orf19.1777	orf19.1777	Ortholog(s) have ubiquitin-specific protease activity, role in endocytosis, protein deubiquitination and cell division site, cytosol, nucleus, peroxisome, transport vesicle localization	0.26975
orf19.1778	orf19.1778	Dubious open reading frame	0.26975
orf19.1779	MP65	Cell surface mannoprotein; cell-wall glucan metabolism, adhesion; adhesin motif; O-glycosylation; induced by heat, germ tube formation, wall regeneration; mycelial antigen; diagnostic marker; fluconazole-repressed; Spider biofilm induced	0.26975
orf19.178	orf19.178	Ortholog of C. dubliniensis CD36 : Cd36_32460, C. parapsilosis CDC317 : CPAR2_205480, Candida tenuis NRRL Y-1498 : CANTEDRAFT_115156 and Debaryomyces hansenii CBS767 : DEHA2E22154g	0.26975
orf19.1780	orf19.1780	Has domain(s) with predicted catalytic activity	0.2695
orf19.1782	orf19.1782	Membrane-localized protein of unknown function	0.2695
orf19.1783	YOR1	Protein similar to S. cerevisiae Yor1; ABC-type plasma membrane transporter involved in resistance to aureobasidin A; white cell type-specific transcript; Spider biofilm induced	0.2695
orf19.1785	orf19.1785	Protein with a PI31 proteasome regulator domain; Hap43-repressed; flow model biofilm induced	0.2695
orf19.1789	orf19.1789	Ortholog(s) have mitochondrion localization	0.26925
orf19.1789.1	LYS1	Saccharopine dehydrogenase (biosynthetic); enzyme of alpha-aminoadipate lysine biosynthesis pathway; functionally complements S. cerevisiae lys1 mutation; fungal-specific (no human or murine homolog)	0.26875
orf19.1791	orf19.1791	Putative protein with a predicted role in 60S ribosomal subunit biogenesis; Hap43p-induced gene; ortholog of S. cerevisiae MAK11	0.2685
orf19.1792	orf19.1792	Ortholog(s) have ubiquitin-protein ligase activity	0.2685
orf19.1793	orf19.1793	Ortholog(s) have phosphatidylinositol binding activity, role in cellular response to nitrogen starvation, piecemeal microautophagy of nucleus and Golgi apparatus, endosome, extrinsic to membrane, fungal-type vacuole localization	0.2685
orf19.1794	orf19.1794	Ortholog(s) have RNA binding, translation regulator activity and role in Group I intron splicing, mitochondrial respiratory chain complex IV biogenesis, positive regulation of mitochondrial translation	0.26775
orf19.1795	PUF3	Ortholog os S. cerevisiae Puf3; mRNA-binding protein involved in RNA catabolism; mutant is viable	0.2675
orf19.1796	orf19.1796	Putative glyoxylate reductase; acts on glyoxylate and hydroxypyruvate substrates; Spider biofilm repressed	0.2675
orf19.1797	orf19.1797	D-arabinose 5-phosphate isomerase; has GutQ domain which is associated with phosphosugar binding; other biofilm induced; rat catheter and Spider biofilm induced; F-12/CO2 early biofilm induced	0.2675
orf19.1798	TSC2	Putative GTPase-activating protein; similar to mammalian tuberin; involved in control of filamentous growth; mutants are viable	0.2675
orf19.1799	GAP5	Putative general amino acid permease; fungal-specific (no human or murine homolog)	0.26725
orf19.18	IMH3	Inosine monophosphate (IMP) dehydrogenase; enzyme of GMP biosynthesis; target of mycophenolic acid and mizoribine monophosphate; antigenic during infection; repressed in core stress response; snoRNA snR54 encoded within IMH3 intron	0.267
orf19.1800	orf19.1800	Protein of unknown function; Spider biofilm induced	0.26675
orf19.1801	CBR1	Putative cytochrome B5 reductase; plasma membrane-localized	0.26675
orf19.1802	OFD1	Putative prolyl hydroxylase family member; regulates Ume6p stability in response to oxygen; inhibited by hypoxia; repressed by prostaglandins; Spider biofilm induced	0.2665
orf19.1803	CDC43	Beta subunit of heterodimeric protein geranylgeranyltransferase type I; GGTase I enzyme binds zinc, is Mg-dependent; Cdc42p is GGTase I substrate	0.266
orf19.1804	orf19.1804	Ortholog(s) have role in cellular response to cadmium ion, detoxification of cadmium ion and mitochondrion localization	0.266
orf19.1805	PEX14	Ortholog(s) have peroxisome matrix targeting signal-1 binding, peroxisome matrix targeting signal-2 binding, protein binding, bridging activity	0.26575
orf19.1806	orf19.1806	Ortholog of C. dubliniensis CD36 : Cd36_30340, C. parapsilosis CDC317 : CPAR2_203900, Candida tenuis NRRL Y-1498 : CANTEDRAFT_113094 and Debaryomyces hansenii CBS767 : DEHA2G22374g	0.26575
orf19.1808	MED5	RNA polymerase II mediator complex subunit; transcription positively regulated by Tbf1p	0.26575
orf19.1813	FLC2	Protein involved in heme uptake; putative FAD transporter, similar to S. cerevisiae Flc2p	0.26475
orf19.1814	STT4	Putative phosphatidylinositol-4-kinase	0.264
orf19.1815	orf19.1815	Ortholog of S. cerevisae/S. pombe Tif6; constituent of 66S pre-ribosomal particles; Spider biofilm induced	0.264
orf19.1816	ALS3	Cell wall adhesin; epithelial adhesion, endothelial invasion; alleles vary in adhesiveness; immunoprotective in mice; binds SspB adhesin of S. gordonii in mixed biofilm; induced in/required for Spider biofilm; flow model biofilm repressed	0.26375
orf19.182	orf19.182	Ortholog(s) have rRNA (guanine-N1-)-methyltransferase activity, role in rRNA modification and endoplasmic reticulum, mitochondrion localization	0.2635
orf19.1821	orf19.1821	Protein of unknown function; repressed by alpha pheromone in SpiderM medium	0.26325
orf19.1822	UME6	Zn(II)2Cys6 transcription factor; role in hyphal extension, virulence, adherence to plastic; filament induced; regulated by Nrg1/Tup1/Rfg1, alkaline conditions; expression promotes highly filamentous biofilms; rat catheter biofilm induced	0.26325
orf19.1823	orf19.1823	Predicted membrane protein; transcript repressed by ciclopirox olamine	0.26325
orf19.1824	PGA50	Putative GPI-anchored protein; adhesin-like protein	0.263
orf19.1825	orf19.1825	Protein of unknown function; mutants are viable; filament induced; regulated by Nrg1, Rfg1, Tup1	0.2625
orf19.1826	MDM34	Putative zinc finger transcription factor; macrophage-downregulated; flow model biofilm induced; flow model and Spider biofilm induced	0.26225
orf19.1827	orf19.1827	Protein of unknown function; flow model biofilm induced; induced by alpha pheromone in SpiderM medium	0.26225
orf19.1828	BUD16	Putative pyridoxal kinase; a key enzyme in pyridoxal 5'-phosphate synthesis, the active form of vitamin B6; involved in bud-site selection and genome integrity in S. cerevisiae; induced by alpha pheromone in SpiderM medium	0.262
orf19.183	HIS3	Imidazoleglycerol-phosphate dehydratase, enzyme of histidine biosynthesis; functionally complements S. cerevisiae his3-1 mutation; hyphal-induced expression; regulated by Gcn2p and Gcn4p; fungal-specific (no human or murine homolog)	0.262
orf19.1830	orf19.1830	Protein of unknown function; Hap43-induced; rat catheter and Spider biofilm induced	0.2615
orf19.1831	orf19.1831	Dubious open reading frame	0.2615
orf19.1832	FCY23	Putative transporter; Gcn4p-regulated; more similar to S. cerevisiae Tpn1p, which is a vitamin B6 transporter, than to purine-cytosine permeases	0.2615
orf19.1833	orf19.1833	Ortholog(s) have pseudouridine synthase activity	0.26125
orf19.1834	orf19.1834	Ortholog of C. dubliniensis CD36 : Cd36_09960, C. parapsilosis CDC317 : CPAR2_212580, Debaryomyces hansenii CBS767 : DEHA2G11770g and Pichia stipitis Pignal : PICST_51041	0.261
orf19.1835	PEA2	Putative coiled-coil polarisome; predicted role in polarized morphogenesis, cell fusion, and low affinity Ca2+ influx; rat catheter biofilm induced	0.2605
orf19.1836	APN2	Putative class II abasic (AP) endonuclease; flucytosine induced	0.26025
orf19.1837	TBP1	Transcription initiation factor; binds TATA box sequence, binding does not require TFIIA; caspofungin repressed; functional homolog of S. cerevisiae and human TATA-binding proteins; Spider biofilm induced	0.26025
orf19.1839	RPA190	Putative RNA polymerase I subunit A190; Hap43p-induced gene; flucytosine induced	0.26025
orf19.184	MDM10	Predicted component of the mitochondrial sorting and assembly machinery (SAM complex) and ER-mitochondria encounter structure (ERMES) complex with a role in protein import into mitochondria	0.26
orf19.1840	orf19.1840	Predicted lipid-binding ER protein; involved in ER-plasma membrane tethering; Spider biofilm induced	0.2595
orf19.1841	orf19.1841	Protein of unknown function; Hap43-induced gene	0.2595
orf19.1842	BUD5	Predicted GTP/GDP exchange factor for Rsr1; rat catheter biofilm induced	0.2595
orf19.1843	ALG6	Putative glucosyltransferase involved in cell wall mannan biosynthesis; transcription is elevated in chk1, nik1, and sln1 homozygous null mutants; repressed by nitric oxide; possibly essential gene, disruptants not obtained by UAU1 method	0.2595
orf19.1844	orf19.1844	Protein similar to ferric reductase Fre10p	0.2595
orf19.1847	ARO10	Aromatic decarboxylase; Ehrlich fusel oil pathway of aromatic alcohol biosynthesis; alkaline repressed; protein abundance affected by URA3 expression in CAI-4 strain; Spider biofilm induced	0.25875
orf19.1848.1	orf19.1848.1	Ortholog of S. cerevisiae : KSH1, C. dubliniensis CD36 : Cd36_32390, C. parapsilosis CDC317 : CPAR2_203260, Candida tenuis NRRL Y-1498 : CANTEDRAFT_116778 and Debaryomyces hansenii CBS767 : DEHA2A10604g	0.25875
orf19.1849	orf19.1849	Ortholog(s) have U3 snoRNA binding, rRNA binding activity, role in maturation of SSU-rRNA from tricistronic rRNA transcript (SSU-rRNA, 5.8S rRNA, LSU-rRNA) and nucleolus, small-subunit processome localization	0.25875
orf19.185	orf19.185	Ortholog(s) have structural constituent of ribosome activity, role in mitochondrial translational initiation and mitochondrial small ribosomal subunit localization	0.2585
orf19.1850	SIW14	Putative protein phosphatase of the PTP family (tyrosine-specific), similar to S. cerevisiae Siw14p; mutant shows virulence defect; Hap43p-repressed gene	0.25825
orf19.1852	orf19.1852	Ortholog(s) have mitochondrion localization	0.258
orf19.1853	HHT2	Putative histone H3; farnesol regulated; Hap43-induced; rat catheter and Spider biofilm repressed	0.258
orf19.1854	HHF22	Putative histone H4; regulated by Efg1; flucytosine, fluconazole-induced; amphotericin B, caspofungin repressed; colony morphology-related gene regulation by Ssn6; Hap43-induced; rat catheter and Spider biofilm repressed	0.258
orf19.1855	orf19.1855	Predicted membrane transporter, member of the anion:cation symporter (ACS) family, major facilitator superfamily (MFS); Gcn4p-regulated; flucytosine induced; ketoconazole-repressed; oxidative stress-induced via Cap1p	0.25775
orf19.1856	orf19.1856	Ortholog(s) have histone deacetylase activity	0.2575
orf19.1857	orf19.1857	Putative L-azetidine-2-carboxylic acid acetyltransferase; mutants are viable	0.25725
orf19.1860	LSC2	Putative succinate-CoA ligase beta subunit; regulated by Mig1, Tup1; induced in high iron; protein present in exponential and stationary growth phase yeast cells; Spider biofilm repressed	0.257
orf19.1860.1	orf19.1860.1	Ortholog(s) have extracellular region localization	0.25625
orf19.1861	orf19.1861	Protein of unknown function; flow model biofilm induced	0.25575
orf19.1862	orf19.1862	Possible stress protein; increased transcription associated with CDR1 and CDR2 overexpression or fluphenazine treatment; regulated by Sfu1, Nrg1, Tup1; stationary phase enriched protein; Spider biofilm induced	0.255
orf19.1863	orf19.1863	Has domain(s) with predicted Rho guanyl-nucleotide exchange factor activity, role in regulation of Rho protein signal transduction and intracellular localization	0.255
orf19.1864	orf19.1864	Ortholog(s) have role in ribosome-associated ubiquitin-dependent protein catabolic process and RQC complex, cytosol, cytosolic large ribosomal subunit localization	0.25475
orf19.1865	MCS7	S. cerevisiae ortholog Mcs7 has a role in reciprocal meiotic recombination; Spider biofilm repressed	0.2545
orf19.1866	VMA10	Subunit G of the V1 peripheral membrane domain of the vacuolar H+-ATPase (V-ATPase); involved in vacuolar acidification; rat catheter biofilm repressed	0.25375
orf19.1867	orf19.1867	Putative malate permease; induced during macrophage infection; regulated by Gcn2 and Gcn4; putative peroxisome targeting signal; Hap43-repressed; Spider biofilm induced	0.2535
orf19.1868	RNR22	Putative ribonucleoside diphosphate reductase;colony morphology-related gene regulation by Ssn6; transcript regulated by tyrosol and cell density; Hap43-repressed; Spider biofilm induced	0.2535
orf19.187	orf19.187	Predicted ORF in Assemblies 19, 20 and 21; merged with orf19.188 in Assembly 21	0.2535
orf19.1871	orf19.1871	Ortholog(s) have structural molecule activity, role in histone exchange and Swr1 complex, cytosol localization	0.253
orf19.1872	orf19.1872	Plasma membrane protein; repressed by nitric oxide	0.253
orf19.1873	orf19.1873	Protein of unknown function; Hap43-repressed gene; repressed by nitric oxide	0.25275
orf19.1874	orf19.1874	Ortholog(s) have protein serine/threonine kinase activity, role in meiosis, meiotic recombination checkpoint, protein phosphorylation, regulation of linear element assembly and cytosol, linear element localization	0.25275
orf19.1876	orf19.1876	Ortholog(s) have mRNA binding activity, role in mRNA splice site selection, positive regulation of mRNA splicing, via spliceosome and U1 snRNP, U2-type prespliceosome, commitment complex localization	0.2525
orf19.1877	orf19.1877	Ortholog(s) have cytoplasm, nucleus localization	0.25225
orf19.1878	MED4	RNA polymerase II core mediator complex subunit	0.25175
orf19.188	orf19.188	Ortholog of Candida albicans WO-1 : CAWG_04234	0.25175
orf19.1880	HEM15	Putative ferrochelatase involved in heme biosynthesis; transcript not regulated by iron levels and not affected by a yfh1 null mutation; Spider biofilm repressed	0.251
orf19.1881	orf19.1881	Putative broad-specificity lysophospholipid acyltransferase; role in glycerophospholipid biosynthesis; rat catheter biofilm repressed	0.251
orf19.1883	YCS4	Putative condensin complex subunit; cell-cycle regulated periodic mRNA expression	0.2505
orf19.1885	TAF4	Putative TFIID subunit; mutation confers hypersensitivity to toxic ergosterol analog	0.2505
orf19.1886	RCL1	Putative U3-containing 90S preribosome processome complex subunit; Hap43-induced; essential; S. cerevisiae ortholog is essential; represses in core stress response;	0.2505
orf19.1887	orf19.1887	Ortholog(s) have sterol esterase activity, role in sterol metabolic process and integral to membrane, lipid particle localization	0.2505
orf19.1888	orf19.1888	Putative nicotinamide riboside hydrolase; cleaves N-glycosidic bonds in nucleosides; pyrimidine salvage and nicotinamide riboside salvage pathways; Spider biofilm induced	0.2505
orf19.1889	orf19.1889	Putative phosphoglycerate mutase family protein; stationary phase enriched protein; early-stage flow model biofilm induced; Spider biofilm repressed	0.25
orf19.1890	orf19.1890	Ortholog(s) have role in medium-chain fatty acid biosynthetic process	0.25
orf19.1891	orf19.1891	Vacuolar aspartic proteinase; transcript equivalent in yeast-form and mycelial cells but is elevated at lower growth temperatures; upregulated iby human neutrophils; protein enriched in stationary phase; Spider biofilm induced	0.24975
orf19.1893	orf19.1893	Protein of unknown function; Spider biofilm repressed	0.24975
orf19.1896	SSC1	Heat shock protein; at yeast-form cell surface, not hyphae; antigenic; Gcn4-regulated; induced by amino acid starvation (3-AT) or by adherence to polystyrene; macrophage-repressed; sumoylation target; possibly essential	0.2495
orf19.1897	orf19.1897	Ortholog of C. dubliniensis CD36 : Cd36_21640, C. parapsilosis CDC317 : CPAR2_105040, Candida tenuis NRRL Y-1498 : CANTEDRAFT_112352 and Debaryomyces hansenii CBS767 : DEHA2C08008g	0.24925
orf19.190	orf19.190	Ortholog(s) have role in endoplasmic reticulum organization, histone exchange and Swr1 complex, mitochondrion localization	0.24925
orf19.1900	orf19.1900	Ortholog(s) have RNA methyltransferase activity, role in 7-methylguanosine cap hypermethylation, meiosis, nucleologenesis, regulation of telomere maintenance via telomerase and nucleolus localization	0.249
orf19.1901	MCM3	Putative DNA replication protein; periodic mRNA expression, peak at cell-cycle M/G1 phase; Spider biofilm induced	0.249
orf19.1902	NOC4	Putative nucleolar protein; Hap43-induced; mutation confers resistance to 5-fluorocytosine (5-FC), 5-fluorouracil (5-FU), and tubercidin (7-deazaadenosine); Spider biofilm induced	0.24875
orf19.1906	orf19.1906	Protein of unknown function; flow model biofilm induced	0.24875
orf19.1907	EMC9	Ortholog of S. cerevisiae Nnf2; possible role in chromosome segregation; mutants are viable, induced during the mating process	0.24825
orf19.191	KIC1	Member of the GCK-III subfamily of eukaryotic Ste20p kinases; in RAM cell wall integrity signaling network; role in cell separation, azole sensitivity; required for hyphal growth; constitutive expression is MTL, white-opaque independent	0.24825
orf19.1910	orf19.1910	Predicted NADH-dependent flavin oxidoreductase; Hap43-repressed gene	0.24825
orf19.1911	PGA52	GPI-anchored cell surface protein of unknown function; Hap43p-repressed gene; fluconazole-induced; possibly an essential gene, disruptants not obtained by UAU1 method	0.24825
orf19.1913	orf19.1913	Protein of unknown function; flow model biofilm induced	0.2475
orf19.1914	FAV3	Putative alpha-1,6-mannanase; induced by mating factor in MTLa/MTLa opaque cells	0.2475
orf19.1915	MPP10	Putative SSU processome and 90S preribosome component; repressed in core stress response; repressed by prostaglandins	0.247
orf19.1917	orf19.1917	Protein of unknown function; Spider biofilm repressed	0.24675
orf19.192	orf19.192	Ortholog of C. dubliniensis CD36 : Cd36_19320, C. parapsilosis CDC317 : CPAR2_209670, Candida tenuis NRRL Y-1498 : CANTEDRAFT_113478 and Debaryomyces hansenii CBS767 : DEHA2C15136g	0.24675
orf19.1920	orf19.1920	Ortholog of C. dubliniensis CD36 : Cd36_15040	0.24675
orf19.1923	RRN3	Protein with a predicted role in recruitment of RNA polymerase I to rDNA; caspofungin induced; flucytosine repressed; repressed in core stress response; repressed by prostaglandins	0.24625
orf19.1925	TLO5	Member of a family of telomere-proximal genes of unknown function; may be spliced in vivo	0.246
orf19.1926	SEF2	Zn(II)2Cys6 transcription factor, required for normal resistance to copper; repressed by Sfu1 in high-iron conditions; regulated by Sef1, Sfu1, and Hap43; rat catheter and Spider biofilm induced	0.246
orf19.1927	SNM1	Protein similar to RNase MRP RNA binding protein; ciclopirox olamine induced; regulated by Sef1, Sfu1, and Hap43; Spider biofilm induced	0.246
orf19.193	orf19.193	Ortholog of C. dubliniensis CD36 : Cd36_19310, C. parapsilosis CDC317 : CPAR2_209710, Candida tenuis NRRL Y-1498 : CANTEDRAFT_113479 and Debaryomyces hansenii CBS767 : DEHA2C15114g	0.24525
orf19.1930	CFL5	Ferric reductase; induced in low iron; ciclopirox olamine, flucytosine induced; amphotericin B, Sfu1 repressed; Tbf1, Hap43 induced	0.245
orf19.1932	CFL4	C-terminus similar to ferric reductases; induced in low iron; Sfu1-repressed; ciclopirox olamine induced; colony morphology-related gene regulation by Ssn6; Hap43-repressed; Sef1-regulated	0.24475
orf19.1933	orf19.1933	Ortholog(s) have role in peroxisome organization and peroxisomal membrane localization	0.2445
orf19.1934	HST3	Histone H3K56 deacetylase; reduced copy number increases opaque cell formation; repressed by MMS, hydroxyurea and high-levels of hydrogen peroxide; Hap43p-induced; ectopic expression blocks genotoxin-induced switching; nicotinamide target	0.24425
orf19.1935	orf19.1935	Dubious open reading frame	0.24425
orf19.1936	SNF1	Essential protein; functional homolog of S. cerevisiae Snf1p regulator of sugar metabolism; constitutively expressed; Thr208 phosphorylation may have regulatory role; up-regulation associated with azole resistance; has polyhistidine tract	0.244
orf19.1938	orf19.1938	Ortholog of S.pombe SPCC825.05c; a predicted splicing coactivator; transcription repressed in azole-resistant strain overexpressing CDR1 and CDR2; induced by benomyl treatment	0.2435
orf19.1939	orf19.1939	Ortholog of S. cerevisiae : YDR374C, C. glabrata CBS138 : CAGL0A02970g, C. dubliniensis CD36 : Cd36_51030, C. parapsilosis CDC317 : CPAR2_303320 and Candida tenuis NRRL Y-1498 : CANTEDRAFT_106457	0.243
orf19.194	orf19.194	Ortholog of C. dubliniensis CD36 : Cd36_19300, C. parapsilosis CDC317 : CPAR2_209720, Candida tenuis NRRL Y-1498 : CANTEDRAFT_114035 and Debaryomyces hansenii CBS767 : DEHA2E10494g	0.243
orf19.1940	orf19.1940	Ortholog(s) have role in cellular response to cadmium ion, detoxification of cadmium ion, ubiquinone biosynthetic process and mitochondrial inner membrane localization	0.2425
orf19.1941	NUF2	Kinetochore component; amount of Nuf2p and Mtw1p protein detected at each centromere is consistent with a single kinetochore microtubule attachment site	0.2425
orf19.1942	SGE1	Putative multidrug resistance factor; induced in low iron; regulated by Sef1, Sfu1, and Hap43	0.242
orf19.1943	orf19.1943	Ortholog of C. parapsilosis CDC317 : CPAR2_302610, C. dubliniensis CD36 : Cd36_51070, Candida orthopsilosis Co 90-125 : CORT_0E04770 and Spathaspora passalidarum NRRL Y-27907 : SPAPADRAFT_50634	0.242
orf19.1944	GPR1	Plasma membrane G-protein-coupled receptor of the cAMP-PKA pathway; required for WT hyphal growth; reports differ on role in cAMP-mediated glucose signaling; Gpr1 C terminus binds Gpa2; regulates HWP1 and ECE1; flow model biofilm induced	0.242
orf19.1945	AUR1	Inositolphosphorylceramide (IPC) synthase; catalyzes the key step in sphingolipid biosynthesis; antifungal drug target; flow model biofilm induced; Spider biofilm induced	0.24175
orf19.1946	orf19.1946	Similar to an aldose 1-epimerase-related protein; antigenic during murine systemic infection; protein present in exponential and stationary phase yeast cultures; Hap43-induced; Spider biofilm repressed	0.2415
orf19.1948	orf19.1948	Ortholog of C. dubliniensis CD36 : Cd36_51110, C. parapsilosis CDC317 : CPAR2_302560, Candida tenuis NRRL Y-1498 : CANTEDRAFT_135271 and Debaryomyces hansenii CBS767 : DEHA2E12914g	0.2415
orf19.1949	VPS1	Dynamin-family GTPase-related protein; induced upon adherence to polystyrene; regulated by Gcn2p and Gcn4p	0.241
orf19.1950	orf19.1950	Ortholog(s) have phosphatase activity	0.241
orf19.1952	orf19.1952	Protein not essential for viability; merged with orf19.1953 in Assembly 21	0.24075
orf19.1953	orf19.1953	Predicted protein of unknown function; merged with orf19.1952 in Assembly 21	0.24075
orf19.1954	PUS4	Putative pseudouridine synthase; transcript regulated by Nrg1, Mig1, and Tup1	0.24075
orf19.1955	orf19.1955	Ortholog(s) have palmitoyltransferase activity, role in protein palmitoylation, protein targeting to membrane and endoplasmic reticulum palmitoyltransferase complex, extrinsic to endoplasmic reticulum membrane localization	0.24075
orf19.1956	orf19.1956	Ortholog(s) have role in reciprocal meiotic recombination and mitochondrion localization	0.24025
orf19.1957	CYC3	Mitochondrial cytochrome c heme lyase; antigenic cell-wall protein; filament induced; induced on polystyrene adherence, interaction with macrophage; N-glycosylation, 2 heme-binding motifs; rat catheter, Spider biofilm induced	0.24
orf19.1958	orf19.1958	Dubious open reading frame	0.23925
orf19.1959	orf19.1959	Ortholog(s) have ubiquitin-specific protease activity, role in protein deubiquitination and cytosol, ribosome localization	0.23925
orf19.1960	CLN3	G1 cyclin; depletion abolishes budding and causes hyphal growth defects; farnesol regulated, functional in S. cerevisiae; possibly essential (UAU1 method); other biofilm induced; Spider biofilm induced	0.239
orf19.1961	orf19.1961	Planktonic growth-induced gene	0.239
orf19.1963	GDS1	Putative mitochondrial protein; Hap43-repressed gene; Spider biofilm induced	0.23875
orf19.1964	orf19.1964	Protein of unknown function; repressed by fluphenazine treatment; induced by benomyl treatment and in an RHE model; regulated by Nrg1, Tup1	0.23875
orf19.1966	BUD23	Putative methyltransferase; Hap43-induced; repressed by prostaglandins	0.23875
orf19.1967	orf19.1967	Ortholog(s) have structural constituent of ribosome activity and mitochondrial large ribosomal subunit localization	0.2385
orf19.1968	orf19.1968	Ortholog of C. dubliniensis CD36 : Cd36_51280, C. parapsilosis CDC317 : CPAR2_501840, Candida tenuis NRRL Y-1498 : cten_CGOB_00020 and Debaryomyces hansenii CBS767 : DEHA2F24310g	0.2385
orf19.1968.1	orf19.1968.1	Predicted non-catalytic subunit of N-terminal acetyltransferase; Spider biofilm induced	0.23825
orf19.1969	CCW14	Putative mannoprotein of cell wall with role in response to stress; increased mRNA abundance observed in cyr1 homozygous mutant (hyphal or yeast-form cells) and in ras1 homozygous mutant (yeast-form cells)	0.238
orf19.1970	orf19.1970	Putative vacuole biogenesis protein	0.23775
orf19.1971	TRY3	RING-finger transcription factor; regulator of yeast form adherence; required for yeast cell adherence to silicone substrate; Spider biofilm induced	0.23775
orf19.1972	orf19.1972	Ortholog(s) have S-adenosylmethionine-dependent methyltransferase activity, role in histone lysine methylation and cytoplasm, nuclear chromatin localization	0.23775
orf19.1973	HAP5	Component of CCAAT-binding transcription factor; roles in filamentous growth, low-iron induction of FRP1; regulates genes involved in respiratory growth; functional homolog of S. cerevisiae Hap5p; Cap1p-dependent expression in low iron	0.2375
orf19.1974	TFS1	Putative carboxypeptidase y inhibitor; transcript regulated upon yeast-hypha switch; colony morphology-related gene regulation by Ssn6	0.2375
orf19.1975	orf19.1975	Ortholog(s) have role in mRNA splicing, via spliceosome, regulation of DNA methylation and U4/U6 x U5 tri-snRNP complex, U5 snRNP localization	0.2375
orf19.1976	TRX2	Similar to thioredoxins; not expected to be enzymatically active because it lacks a canonical thioredoxin active site (Trp-Cys-Gly-Pro-Cys); TRX1 encodes all of the cytoplasmic/nuclear thioredoxin function in C. albicans; Hap43p-induced	0.23725
orf19.1977	URA4	Dihydroorotase; protein present in exponential and stationary growth phase yeast cultures	0.23725
orf19.1978	GIT2	Putative glycerophosphoinositol permease; fungal-specific; repressed by alpha pheromone in SpiderM medium; Hap43-repressed; Spider biofilm induced	0.23725
orf19.1979	GIT3	Glycerophosphocholine permease; white cell specific transcript; fungal-specific; alkaline repressed; caspofungin, macrophage/pseudohyphal-repressed; flow model biofilm induced; Spider biofilm induced	0.23725
orf19.198	ASN1	Putative asparagine synthetase; soluble protein in hyphae; regulated by Rim101; decreased expression at pH 4 vs pH 8; protein detected during exponential and stationary phases of yeast-form growth	0.23725
orf19.1980	GIT4	Glycerophosphocholine transporter; fungal-specific (no human or murine homolog); possibly an essential gene, disruptants not obtained by UAU1 method; Hap43p-repressed gene	0.237
orf19.1981	IMP2	Predicted subunit of the mitochondrial inner membrane peptidase complex involved in protein targeting to mitochondria	0.237
orf19.1985	orf19.1985	Has aminoglycoside phosphotransferase and protein kinase domains; rat catheter and flow model biofilm induced	0.23675
orf19.1986	ARO2	Putative chorismate synthase; fungal-specific (no human or murine homolog); protein level decreased in stationary phase yeast cultures; GlcNAc-induced protein	0.2365
orf19.1988	CDC45	Putative DNA replication initiation factor; transcriptionally regulated by interaction with macrophage	0.2365
orf19.1989	DCW1	Protein with predicted GPI modification; dfg5 dcw1 double mutant is inviable; not required for wild-type hyphal growth; upregulated in cyr1 mutant (yeast or hyphal form); Hap43-induced	0.2365
orf19.199	orf19.199	Protein of unknown function; hyphal-induced expression; upregulated in a cyr1 null mutant	0.23575
orf19.1990	SNX4	Putative sorting nexin; induced during the mating process	0.23575
orf19.1991	orf19.1991	Ortholog(s) have cytoplasm localization	0.23525
orf19.1992	SIR2	Required for wild-type lifespan, asymmetric inheritance of oxidatively damaged proteins, rDNA silencing; regulates phenotypic switch in strain 3153A, not WO-1; partially complements S. cerevisiae sir2 mating defect; Spider biofilm induced	0.23525
orf19.1993	orf19.1993	Ortholog(s) have structural molecule activity, role in proteasome assembly, ubiquitin-dependent protein catabolic process and nucleus, proteasome regulatory particle, lid subcomplex, proteasome storage granule localization	0.23475
orf19.1994	orf19.1994	Ortholog(s) have phosphatidylinositol-3-phosphate binding activity, role in retrograde transport, endosome to Golgi and endosome localization	0.2345
orf19.1995	MNN24	Alpha-1,2-mannosyltransferase; required for normal cell wall mannan content	0.2345
orf19.1996	CHA1	Similar to catabolic ser/thr dehydratases; repressed by Rim101; induced in low iron; regulated on white-opaque switch; filament induced; Tn mutation affects filamentation; flow model biofilm induced; Spider biofilm repressed	0.2345
orf19.1998	orf19.1998	Ortholog of C. dubliniensis CD36 : Cd36_16140, C. parapsilosis CDC317 : CPAR2_213870, Candida tenuis NRRL Y-1498 : CANTEDRAFT_92202 and Debaryomyces hansenii CBS767 : DEHA2A01980g	0.2345
orf19.1999	orf19.1999	Protein of unknown function; transcript detected on high-resolution tiling arrays	0.234
orf19.20	RTS1	Putative serine/threonine-protein phosphatase B-type regulatory subunit; transcription is regulated upon yeast-hyphal switch	0.234
orf19.200	orf19.200	Putative nuclear RNA-binding protein; Spider biofilm repressed	0.234
orf19.2000	orf19.2000	Ortholog(s) have DNA helicase activity, role in DNA replication initiation, donor selection, interstrand cross-link repair, mitotic sister chromatid cohesion, negative regulation of DNA recombination and cytosol, nucleus localization	0.23375
orf19.2001	orf19.2001	Has domain(s) with predicted L-ascorbic acid binding, iron ion binding, oxidoreductase activity, acting on paired donors, with incorporation or reduction of molecular oxygen and 2-oxoglutarate as one donor, more	0.23375
orf19.2002	orf19.2002	Ortholog(s) have structural constituent of nuclear pore activity and role in nuclear pore organization, poly(A)+ mRNA export from nucleus, protein import into nucleus, ribosomal large subunit export from nucleus	0.2335
orf19.2003	HNM1	Putative choline/ethanolamine transporter; mutation confers hypersensitivity to toxic ergosterol analog; colony morphology-related gene regulation by Ssn6; clade-associated gene expression	0.2335
orf19.2005	REG1	Putative protein phosphatase regulatory subunit; Hap43-repressed gene; macrophage/pseudohyphal-induced; possibly regulated upon hyphal formation; flow model biofilm induced	0.23325
orf19.2006	orf19.2006	Ortholog(s) have fungal-type vacuole membrane localization	0.233
orf19.2006.1	COX17	Putative copper metallochaperone; Hap43p-repressed gene; rat catheter biofilm induced; Spider biofilm induced	0.23275
orf19.2007	orf19.2007	Ortholog(s) have role in Golgi to vacuole transport, ascospore wall assembly, retrograde transport, endosome to Golgi and GARP complex, mitochondrion localization	0.23275
orf19.2008	orf19.2008	Ortholog(s) have S-methyl-5-thioribose-1-phosphate isomerase activity, role in L-methionine salvage from methylthioadenosine and cytosol, nucleus localization	0.23225
orf19.2009	PEX12	Ortholog(s) have ubiquitin-protein ligase activity, role in protein import into peroxisome matrix and integral to peroxisomal membrane localization	0.232
orf19.201	orf19.201	Protein of unknown function; unmerged from orf19.202 in a revision of Assembly 21	0.232
orf19.2010	orf19.2010	Ortholog of C. dubliniensis CD36 : Cd36_16030, C. parapsilosis CDC317 : CPAR2_213800, Debaryomyces hansenii CBS767 : DEHA2A01320g and Pichia stipitis Pignal : PICST_29434	0.23075
orf19.2012	NOT3	Transcriptional regulator; not required for buccal epithelial cell adherence or virulence in mouse systemic infection; null mutant colonies exhibit slightly decreased filamentation ratio; required for yeast adherence to silicone substrate	0.2305
orf19.2013	KAR2	Similar to Hsp70 family chaperones; role in translocation of proteins into the ER; induced in high iron; protein present in exponential and stationary growth phase yeast cultures; flow model and Spider biofilm repressed	0.22925
orf19.2014	BCY1	Protein kinase A regulatory subunit; required for nuclear localization of Tpk1; physically interacts with Tpk1; essential; apoptosis-regulated; bcy1 heterozygous or bcy1 tpk2 mutant has filamentous growth defect	0.229
orf19.2016	ERG28	Ortholog(s) have protein binding, bridging activity, role in ergosterol biosynthetic process and endoplasmic reticulum membrane localization	0.229
orf19.2017	orf19.2017	Ortholog(s) have RNA polymerase I activity and role in regulation of cell size, transcription elongation from RNA polymerase I promoter, transcription of nuclear large rRNA transcript from RNA polymerase I promoter	0.22825
orf19.2018	orf19.2018	Protein with a predicted DnaJ chaperone domain and a CSL-type zinc finger; Spider biofilm induced	0.22825
orf19.2018.1	orf19.2018.1	PProtein of unknown function; gene has intron; similar to human BLOC1S2	0.228
orf19.2019	orf19.2019	Ortholog(s) have structural constituent of ribosome activity and mitochondrial large ribosomal subunit localization	0.228
orf19.2020	HGT6	Putative high-affinity MFS glucose transporter; 20 family members; induced in core stress response; fluconazole, oralpharyngeal candidasis induced; flow model biofilm induced; Spider biofilm induced	0.228
orf19.2021	HGT8	High-affinity glucose transporter of the major facilitator superfamily; 20 members in the C. albicans glucose transporter family; 12 probable membrane-spanning segments; gene has intron; expressed in rich medium; flow model biofilm induced	0.228
orf19.2023	HGT7	Putative MFS glucose transporter; glucose, fluconazole, Snf3 induced, expressed at high glucose; 20 member C. albicans glucose transporter family; 12 TM regions predicted; flow model biofilm induced; Spider biofilm repressed	0.22775
orf19.2024	orf19.2024	Ortholog of Candida albicans WO-1 : CAWG_03878	0.22775
orf19.2025	orf19.2025	Dubious open reading frame	0.2275
orf19.2026	UBP13	Ortholog of S. cerevisiae Ubp13; putative ubiquitin carboxyl-terminal hydrolase; flow model biofilm induced; rat catheter biofilm repressed	0.22725
orf19.2028	MXR1	Putative methionine sulfoxide reductase; Plc1-regulated; induced by human neutrophils, flucytosine; macrophage regulated (gene induced, protein decreased); possibly adherence-induced; Spider biofilm induced	0.227
orf19.2029	RFC5	Putative heteropentameric replication factor C subunit; periodic mRNA expression, peak at cell-cycle G1/S phase	0.227
orf19.203	STB3	Putative SIN3-binding protein 3 homolog; caspofungin induced; macrophage/pseudohyphal-repressed; rat catheter biofilm induced	0.227
orf19.2030	orf19.2030	Plasma membrane-associated protein; induced in cyr1 or ras1 mutant; induced by hypoxia, ketoconazole and during growth in the mouse cecum; induced in oralpharyngeal candidasis; Spider biofilm induced	0.22675
orf19.2031	VPS24	Protein similar to S. cerevisiae Vps24p, which is a member of the ESCRT III protein sorting complex; downregulated upon adherence to polystyrene	0.22675
orf19.2032	orf19.2032	Protein of unknown function; rat catheter biofilm induced	0.2265
orf19.2033	PGA19	Putative GPI-anchored protein; macrophage-induced gene; mutants are viable	0.2265
orf19.2034	orf19.2034	Ortholog of C. parapsilosis CDC317 : CPAR2_212925, C. dubliniensis CD36 : Cd36_15840, Candida orthopsilosis Co 90-125 : CORT_0A12230 and Candida tropicalis MYA-3404 : CTRG_01156	0.2265
orf19.2035	orf19.2035	Ortholog of C. parapsilosis CDC317 : CPAR2_212930, C. dubliniensis CD36 : Cd36_15830, Candida orthopsilosis Co 90-125 : CORT_0A12240 and Candida tropicalis MYA-3404 : CTRG_01155	0.2265
orf19.2036	orf19.2036	Predicted dihydrodiol dehydrogenase; ortholog of S. pombe SPAC513.06c; flow model and rat catheter biofilm repressed	0.22625
orf19.2037	orf19.2037	Ortholog of C. dubliniensis CD36 : Cd36_15810, C. parapsilosis CDC317 : CPAR2_212950, Candida tenuis NRRL Y-1498 : CANTEDRAFT_116162 and Debaryomyces hansenii CBS767 : DEHA2D18392g	0.22625
orf19.2038	orf19.2038	Protein of unknown function; Spider biofilm induced	0.22625
orf19.2039	MSF1	Putative phenylalanine-tRNA ligase; protein level decreases in stationary phase cultures; Hap43p-repressed gene	0.22625
orf19.204	orf19.204	Ortholog of C. dubliniensis CD36 : Cd36_23180, Candida tropicalis MYA-3404 : CTRG_01968 and Candida albicans WO-1 : CAWG_05983	0.22575
orf19.2040	orf19.2040	Ortholog(s) have oxidoreductase activity, acting on NAD(P)H activity, role in iron-sulfur cluster assembly, nitric oxide biosynthetic process, oxidation-reduction process and mitochondrion localization	0.22575
orf19.2041	orf19.2041	Ortholog(s) have DNA translocase activity, histone acetyl-lysine binding activity	0.22575
orf19.2042	orf19.2042	Ortholog(s) have role in mitochondrial tRNA wobble uridine modification and mitochondrial inner membrane localization	0.2255
orf19.2043	orf19.2043	Ortholog of C. dubliniensis CD36 : Cd36_15750, C. parapsilosis CDC317 : CPAR2_213000, Debaryomyces hansenii CBS767 : DEHA2D18524g and Pichia stipitis Pignal : PICST_42355	0.2255
orf19.2044	PGA27	Putative GPI-anchored protein	0.22525
orf19.2045	orf19.2045	Ortholog(s) have diacylglycerol kinase activity, role in phosphatidic acid biosynthetic process and integral to endoplasmic reticulum membrane localization	0.225
orf19.2046	POT1-2	Putative peroxisomal 3-ketoacyl CoA thiolase; Hap43-repressed	0.2245
orf19.2047	orf19.2047	Putative protein of unknown function; Hap43p-repressed gene; mutation confers hypersensitivity to toxic ergosterol analog, and to amphotericin B	0.2245
orf19.2048	orf19.2048	Proten of unknown function; transcript positively regulated by Sfu1; Hap43 repressed; Spider biofilm induced	0.22425
orf19.2049	orf19.2049	Plasma membrane-associated protein; heterozygous null mutant displays sensitivity to virgineone; Spider biofilm induced	0.224
orf19.2050	orf19.2050	Ortholog(s) have sterol esterase activity, role in cellular lipid metabolic process, sterol metabolic process and fungal-type vacuole, integral to membrane, lipid particle localization	0.224
orf19.2051	orf19.2051	Ortholog of C. dubliniensis CD36 : Cd36_15670, C. parapsilosis CDC317 : CPAR2_213100, Candida tenuis NRRL Y-1498 : CANTEDRAFT_135034 and Debaryomyces hansenii CBS767 : DEHA2E14960g	0.224
orf19.2054	FGR15	Putative transcription factor with zinc finger DNA-binding motif; lacks an ortholog in S. cerevisiae; transposon mutation affects filamentous growth; caspofungin induced; mutation causes marginal increase in caspofungin sensitivity	0.22375
orf19.2055	NPL6	Putative nuclear protein localization factor; Hap43-induced; Spider biofilm repressed	0.22375
orf19.2057	orf19.2057	Ortholog(s) have ATP binding, ATPase activity, metallopeptidase activity, role in protein complex assembly, proteolysis, signal peptide processing and m-AAA complex, mitochondrial inner boundary membrane localization	0.22375
orf19.2059	orf19.2059	Protein with homology to magnesium-dependent endonucleases and phosphatases; regulated by Sef1, Sfu1, and Hap43; Spider biofilm induced	0.2235
orf19.206	orf19.206	Putative adhesin-like protein	0.22325
orf19.2060	SOD5	Cu and Zn-containing superoxide dismutase; protects against oxidative stress; induced by neutrophils, hyphal growth, caspofungin, osmotic/oxidative stress; oralpharyngeal candidiasis induced; rat catheter and Spider biofilm induced	0.22275
orf19.2061	orf19.2061	Ortholog of Candida albicans WO-1 : CAWG_03846	0.2225
orf19.2062	SOD4	Cu and Zn-containing superoxide dismutase; role in response to host innate immune ROS; regulated on white-opaque switch; ciclopirox olamine induced; caspofungin repressed; SOD1,4,5,6 gene family; yeast-associated; Spider biofilm induced	0.2225
orf19.2063	orf19.2063	Ortholog of C. parapsilosis CDC317 : CPAR2_213140, C. dubliniensis CD36 : Cd36_15600, Lodderomyces elongisporus NRLL YB-4239 : LELG_01226 and Debaryomyces hansenii CBS767 : DEHA2B02442g	0.222
orf19.2064	orf19.2064	Putative transcription factor with zinc finger DNA-binding motif	0.22175
orf19.2065	orf19.2065	Ortholog(s) have role in allantoin catabolic process and cytosol, nucleus localization	0.2215
orf19.2066	orf19.2066	Ortholog(s) have cytoplasm localization	0.2215
orf19.2066.1	ATP18	F1F0 ATP synthase complex subunit; gene has intron	0.221
orf19.2067	orf19.2067	Protein with a predicted role in mitochondrial iron metabolism; Hap43-repressed; expression upregulated during growth in the mouse cecum; Spider biofilm induced	0.221
orf19.2068	orf19.2068	Ortholog of C. dubliniensis CD36 : Cd36_15550, C. parapsilosis CDC317 : CPAR2_213190, Candida tenuis NRRL Y-1498 : CANTEDRAFT_119026 and Debaryomyces hansenii CBS767 : DEHA2G08514g	0.221
orf19.2069	SMF3	Putative vacuolar iron transporter; alkaline upregulated; caspofungin repressed; induced by Mnl1 under weak acid stress; Hap43-repressed	0.22075
orf19.207	PGA55	GPI-anchored adhesin-like protein; filament induced; regulated by Nrg1, Tup1; regulated upon hyphal formation; mRNA binds to She3 and is localized to yeast-form buds and hyphal tips; induced during chlamydospore formation	0.2205
orf19.2070	orf19.2070	Ortholog(s) have role in G1/S transition of mitotic cell cycle, chromatin remodeling, nucleosome disassembly, transcription elongation from RNA polymerase II promoter and RSC complex localization	0.2205
orf19.2071	orf19.2071	Protein of unknown function; induced by alpha pheromone in SpiderM medium	0.22025
orf19.2072	orf19.2072	Ortholog(s) have (R)-carnitine transmembrane transporter activity, choline transmembrane transporter activity, ethanolamine transmembrane transporter activity	0.22
orf19.2073	orf19.2073	Protein with a multidrug and toxin extrusion protein domain; induced by Mnl1 under weak acid stress	0.22
orf19.2074	orf19.2074	Ortholog of Candida albicans WO-1 : CAWG_03833	0.22
orf19.2075	DFG5	N-linked mannoprotein of cell wall and membrane; possible signal transducer; role in hyphal growth and HWP1 induction in alkaline pH; GPI modification predicted; dfg5 dcw1 double mutant is inviable; caspofungin-induced, fungal-specific	0.21925
orf19.2076	orf19.2076	Protein of unknown function; S. pombe ortholog SPAC7D4.05 encodes a predicted hydrolase; Hap43-repressed; Spider biofilm induced	0.219
orf19.2077	ZCF9	Putative Zn(II)2Cys6 transcription factor; hypersensitive to toxic ergosterol analog ECC69 and/or ECC1384	0.219
orf19.2078	orf19.2078	Ortholog(s) have role in Golgi to vacuole transport and AP-1 adaptor complex localization	0.219
orf19.2079	PHHB	Putative 4a-hydroxytetrahydrobiopterin dehydratase; transposon mutation affects filamentous growth; flow model biofilm induced; Spider biofilm induced	0.219
orf19.2081	POM152	Putative nuclear pore membrane glycoprotein	0.21875
orf19.2082	SAP30	Aspartic-type endopeptidase; involved in degradation of alpha pheromone; functional equivalent of S. cerevisiae Bar1; a-cell specific; induced by alpha pheromone	0.21875
orf19.2084	CDH1	Protein involved in regulation of mitosis; similar to S. cerevisiae Cdh1, which is an APC/C component; transcriptionally induced by Mnl1 under weak acid stress	0.2185
orf19.2087	SAS2	Predicted histone acetyltransferase involved in histone H4 acetylation; member of MYST family	0.2185
orf19.2088	orf19.2088	Putative DNA polymerase epsilon subunit D; null mutant is viable but slow-growing and displays abnormal invasive growth on SD and YPD media; Spider biofilm repressed	0.21825
orf19.2089	orf19.2089	Ortholog of Nyv1, v-SNARE component of the vacuolar SNARE complex involved in vesicle fusion in S. cerevisiae; Hap43-repressed gene	0.218
orf19.209	DFG10	Ortholog(s) have role in dolichol biosynthetic process, dolichol-linked oligosaccharide biosynthetic process, polyprenol catabolic process, pseudohyphal growth and endoplasmic reticulum localization	0.21725
orf19.2090	orf19.2090	Ortholog of S. cerevisiae Ecm16, an essential DEAH-box ATP-dependent RNA helicase specific to the U3 snoRNP required for 18S rRNA synthesis; Hap43-induced; Spider biofilm induced	0.217
orf19.2091	orf19.2091	Putative NADH dehydrogenase; repressed by nitric oxide, Hap43p-repressed	0.21675
orf19.2092	orf19.2092	Putative peroxisomal cystathionine beta-lyase; Gcn4p-regulated	0.21625
orf19.2093	RFA1	Putative DNA replication factor A; RNA abundance regulated by cell cycle, tyrosol and cell density	0.216
orf19.2094	PDR6	Putative pleiotropic drug resistance regulatory protein 6; transcript regulated by Nrg1; induced by alpha pheromone in SpiderM medium	0.21575
orf19.2095	orf19.2095	Ortholog(s) have role in negative regulation of transcription from RNA polymerase II promoter in response to iron and cytosol, nucleus localization	0.2155
orf19.2097	orf19.2097	Predicted DNA-dependent ATPase/helicase; Spider biofilm induced	0.2155
orf19.2098	ARO8	Aromatic transaminase of the Ehrlich fusel oil pathway of aromatic alcohol biosynthesis; Rim101 independent alkaline induction; protein abundance affected by URA3 expression in CAI-4 strain; Gcn4-regulated; stationary phase enriched	0.21525
orf19.2099	HIR1	Component of the HIR complex, a nucleosome assembly factor involved in chromatin formation; involved in regulation of white-opaque switching frequency	0.21525
orf19.21	orf19.21	Ortholog(s) have role in ethanol metabolic process and mitochondrial inner membrane localization	0.215
orf19.210	orf19.210	Ortholog(s) have role in protein localization to bud neck and cellular bud neck, cytosol localization	0.215
orf19.2101	orf19.2101	Ortholog(s) have protein anchor activity, role in protein insertion into ER membrane, retrograde vesicle-mediated transport, Golgi to ER and GET complex, mitochondrion localization	0.21475
orf19.2102	CKB1	Regulatory subunit of protein kinase CK2 (casein kinase II), beta subunit; null mutants are hypersensitive to caspofungin and hydrogen peroxide medium	0.21475
orf19.2103	orf19.2103	Ortholog of Candida albicans WO-1 : CAWG_03811	0.2145
orf19.2104	orf19.2104	Ortholog(s) have chaperone binding activity, role in aerobic respiration, iron-sulfur cluster assembly and mitochondrion localization	0.2145
orf19.2105	orf19.2105	Putative pre-mRNA-splicing factor; possibly an essential gene, disruptants not obtained by UAU1 method	0.2145
orf19.2106	orf19.2106	Putative protein of unknown function; Hap43p-repressed gene	0.21425
orf19.2107	MUQ1	Putative choline phosphate cytidylyltransferase/phosphoethanolamine cytidylyltransferase; repressed in hyphae compared vs yeast; Hap43-repressed; flow model biofilm induced; Spider biofilm repressed	0.21325
orf19.2107.1	STF2	Protein involved in ATP biosynthesis; repressed in hyphae; repressed by Efg1, Hap43; transcript upregulated in clinical isolates from HIV+ patients with oral candidiasis; rat catheter, flow model and Spider biofilm induced	0.21325
orf19.2108	SOD6	Copper- and zinc-containing superoxide dismutase; gene family includes SOD1, SOD4, SOD5, and SOD6; gene may contain an intron; Hap43-repressed; flow model and rat catheter biofilm induced	0.213
orf19.211	orf19.211	Predicted homeodomain-like transcription factor; also has a metal-binding Ada DNA repair protein domain; Spider biofilm induced	0.21275
orf19.2110	orf19.2110	Ortholog(s) have arginyltransferase activity, role in protein arginylation and cytosol, nucleus localization	0.21275
orf19.2111	orf19.2111	Ortholog(s) have core RNA polymerase II binding transcription factor activity and role in transcription elongation from RNA polymerase II promoter, transcriptional start site selection at RNA polymerase II promoter	0.2125
orf19.2111.2	RPL38	60S ribosomal ribosomal protein subunit; genes encoding cytoplasmic ribosomal subunits, translation factors, tRNA synthetases are downregulated upon phagocytosis by murine macrophage	0.2125
orf19.2112	orf19.2112	snRNP U5 splicing factor component; involved in positioning the 3' splice site during the 2nd catalytic step of splicing; Spider biofilm induced	0.2125
orf19.2113	orf19.2113	Putative integral peroxisomal membrane protein; Hap43p-repressed gene	0.2125
orf19.2114	orf19.2114	Predicted uricase; ortholog of S. pombe SPCC1223.09; Spider biofilm induced	0.2125
orf19.2115	orf19.2115	Putative molybdopterin-converting factor; fungal-specific (no human or murine homolog)	0.21225
orf19.2116	NAT2	Putative N-terminal acetyltransferase; Hap43p-repressed gene; mutation confers hypersensitivity to toxic ergosterol analog	0.21225
orf19.2117	LEU5	Putative mitochondrial carrier protein; Hap43-repressed; rat catheter biofilm induced	0.212
orf19.2119	NDT80	Ortholog of Ndt80; meiosis-specific transcription factor; activator of CDR1 induction by antifungal drugs; required for wild-type drug resistance and for Spider biofilm formation; transcript induced by antifungal drug treatment	0.212
orf19.212	VPS28	ESCRT I protein sorting complex subunit; involved in Rim8 processing and proteolytic activation of Rim101, which regulates pH response; role in echinocandin, azole sensitivity	0.212
orf19.2124	orf19.2124	Predicted alcohol dehydrogenase; Spider biofilm induced	0.212
orf19.2125	orf19.2125	Protein of unknown function; GlcNAc-induced protein; Spider biofilm induced; rat catheter biofilm repressed	0.212
orf19.2127	CST5	Scaffold protein for the mitogen-activated protein (MAP) kinase cascade that regulates mating; required for opaque mating or white biofilm formation in response to mating pheromone; induced in response to pheromone; Hap43p-repressed	0.21175
orf19.2128	orf19.2128	Ortholog(s) have mitochondrion localization	0.21175
orf19.2129	orf19.2129	Ortholog of S. cerevisiae Spo71; a meiosis-specific protein required for spore wall formation during sporulation in S. cerevisiae; possibly an essential gene, disruptants not obtained by UAU1 method	0.21175
orf19.213	orf19.213	Ortholog(s) have role in ubiquitin-dependent protein catabolic process and nucleus, proteasome regulatory particle, lid subcomplex, proteasome storage granule localization	0.21125
orf19.2131	orf19.2131	Ortholog(s) have ubiquitin-protein ligase activity and role in protein ubiquitination, ubiquitin-dependent protein catabolic process via the multivesicular body sorting pathway	0.21125
orf19.2132	orf19.2132	Ortholog of C. dubliniensis CD36 : Cd36_65220, C. parapsilosis CDC317 : CPAR2_213740, Candida tenuis NRRL Y-1498 : CANTEDRAFT_92162 and Debaryomyces hansenii CBS767 : DEHA2A01056g	0.211
orf19.2133	LIP4	Secreted lipase, member of a differentially expressed lipase gene family with possible roles in nutrition and/or in creating an acidic microenvironment; expressed more strongly during mucosal infections than during systemic infections	0.211
orf19.2135	TSM1	Putative transcription initiation factor TFIID subunit; transcript is upregulated in clinical isolates from HIV+ patients with oral candidiasis; Nrg1-regulated	0.211
orf19.2137	orf19.2137	Ortholog(s) have mitochondrion localization	0.2105
orf19.2138	ILS1	Putative isoleucyl-tRNA synthetase, the target of drugs including the cyclic beta-amino acid icofungipen/PLD-118/BAY-10-8888 and mupirocin; protein present in exponential and stationary growth phase yeast cultures	0.2105
orf19.2143	orf19.2143	Ortholog(s) have role in endocytic recycling and cytosol, endosome, nucleus localization	0.21025
orf19.2146	HAT2	Putative Hat1-Hat2 histone acetyltransferase complex subunit; role in DNA damage repair and morphogenesis; mutations cause constitutive pseudohyphal growth, caspofungin sensitivity; rat catheter and Spider biofilm repressed	0.21025
orf19.2149	orf19.2149	Putative sulfate permease; S. cerevisiae ortholog YPR003C localizes to the endoplasmic reticulum; regulated by Sef1p-, Sfu1p-, and Hap43p	0.21
orf19.215	orf19.215	Component of a complex containing the Tor2p kinase; possible a role in regulation of cell growth; Spider biofilm induced	0.20975
orf19.2150	orf19.2150	Putative ortholog of mammalian electron transfer flavoprotein complex subunit ETF-alpha; Spider biofilm repressed	0.20975
orf19.2151	NAG6	Protein required for wild-type mouse virulence and wild-type cycloheximide resistance; putative GTP-binding motif; similar to S. cerevisiae Yor165Wp; in gene cluster that encodes enzymes of GlcNAc catabolism; no human or murine homolog	0.2095
orf19.2154	HXK1	N-acetylglucosamine (GlcNAc) kinase; involved in GlcNAc utilization; required for wild-type hyphal growth and mouse virulence; GlcNAc-induced transcript; induced by alpha pheromone in SpiderM medium	0.2095
orf19.2156	NAG1	Glucosamine-6-phosphate deaminase; required for normal hyphal growth and mouse virulence; converts glucosamine 6-P to fructose 6-P; reversible reaction in vitro; gene and protein is GlcNAc-induced; Spider biofilm induced	0.2095
orf19.2157	DAC1	N-acetylglucosamine-6-phosphate (GlcNAcP) deacetylase; N-acetylglucosamine utilization; required for wild-type hyphal growth and virulence in mouse systemic infection; gene and protein are GlcNAc-induced; Spider biofilm induced	0.20925
orf19.2158	NAG3	Putative MFS transporter; similar to Nag4; required for wild-type mouse virulence and cycloheximide resistance; in gene cluster that includes genes encoding enzymes of GlcNAc catabolism; Spider biofilm repressed	0.209
orf19.216	orf19.216	Protein with a metallo-dependent phosphatase domain; ketoconazole-induced; upregulation correlates with clinical development of fluconazole resistance	0.209
orf19.2160	NAG4	Putative transporter; fungal-specific; similar to Nag3p and to S. cerevisiae Ypr156Cp and Ygr138Cp; required for wild-type mouse virulence and wild-type cycloheximide resistance; gene cluster encodes enzymes of GlcNAc catabolism	0.20875
orf19.2163	orf19.2163	Ortholog(s) have cytosol localization	0.20875
orf19.2164.1	MFA1	a-factor mating pheromone; produced in opaque MTLa cells; required for mating competence of MTLa cells, but not MTLalpha; induced by alpha-factor	0.2085
orf19.2165	orf19.2165	Predicted hydrolase; induced by nitric oxide	0.20825
orf19.2166	VMA5	Putative vacuolar H(+)-ATPase; plasma membrane localized; rat catheter biofilm repressed	0.20825
orf19.2167	orf19.2167	Ortholog(s) have role in ribosomal large subunit biogenesis, ribosomal small subunit biogenesis and cytosolic large ribosomal subunit, nucleolus localization	0.208
orf19.2168	orf19.2168	Putative sterol deacetylase; flow model biofilm induced; rat catheter biofilm repressed	0.208
orf19.2168.3	orf19.2168.3	Ortholog(s) have role in cellular protein localization, cytokinesis, site selection, endoplasmic reticulum inheritance, endoplasmic reticulum tubular network organization, nuclear pore complex assembly, vesicle-mediated transport	0.20775
orf19.2169	orf19.2169	Ortholog of C. parapsilosis CDC317 : CPAR2_805720, C. dubliniensis CD36 : Cd36_22330, Lodderomyces elongisporus NRLL YB-4239 : LELG_02628 and Candida orthopsilosis Co 90-125 : CORT_0C03440	0.207
orf19.217	orf19.217	Ortholog(s) have sequence-specific DNA binding activity	0.207
orf19.2170	PHM7	Putative transporter; fungal-specific; Hog1-repressed; repressed by 17-beta-estradiol, ethynyl estradiol; Hap43-induced; Spider biofilm induced	0.2065
orf19.2172	ARA1	D-Arabinose dehydrogenase; dehydro-D-arabinono-1,4-lactone synthesis; active on D-arabinose, L-fucose, L-xylose, L-galactose; inhibited by metal ions, thiol group-specific reagents; induced on polystyrene adherence; Spider biofilm induced	0.20625
orf19.2173	MAF1	Putative negative regulator of RNA polymerase III; decreased expression in hyphae vs yeast cells; caspofungin repressed; Spider biofilm repressed	0.20625
orf19.2174	RAD57	Putative DNA recombination and repair protein; induced by interaction with macrophage; transcript is regulated by Nrg1, Mig1, and Tup1; essential protein; S. cerevisiae ortholog is essential	0.206
orf19.2175	orf19.2175	Putative mitochondrial cell death effector; induced by nitric oxide; Spider biofilm induced; rat catheter biofilm repressed	0.206
orf19.2176	IFM3	Protein with a 2-hydroxyacid dehydrogenase catalytic domain; Hap43-repressed; Plc1-regulated; overlaps orf19.2177	0.206
orf19.2177	orf19.2177	Sef1p-, Sfu1p-, and Hap43p-regulated gene; overlaps IFM3/orf19.2176	0.20575
orf19.2178	MRS4	Mitochondrial carrier family member, involved in iron homeostasis; putative membrane transporter localized to the mitochondrial membrane; transcription under control of Atf2p; regulated by Sef1p, Sfu1p, and Hap43p	0.20525
orf19.2179	SIT1	Transporter of ferrichrome siderophores, not ferrioxamine B; required for human epithelial cell invasion in vitro, not for mouse systemic infection; regulated by iron, Sfu1, Rfg1, Tup1, Hap43; rat catheter and Spider biofilm induced	0.205
orf19.2179.2	RPS10	Ribosomal protein S10; downregulated in the presence of human whole blood or PMNs; Spider biofilm repressed	0.20475
orf19.218	BUD20	Protein similar to S. cerevisiae Bud20p, which affects bud site selection; transposon mutation affects filamentous growth	0.2045
orf19.2180	orf19.2180	Ortholog(s) have calcium ion binding, zinc ion binding activity, role in axial cellular bud site selection, bipolar cellular bud site selection, regulation of COPII vesicle coating and cellular bud neck, cytosol, nucleus localization	0.2045
orf19.2181	orf19.2181	Ortholog of Spathaspora passalidarum NRRL Y-27907 : spas_CGOB_00067 and Candida albicans WO-1 : CAWG_05895	0.2045
orf19.2182	BLM3	Putative proteasome activator; binds core proteasome and stimulates proteasome-mediated protein degradation by inducing gate opening; ortholog of S. cerevisiae Blm10; transcript regulated by Nrg1 and Mig1	0.20425
orf19.2183	KRE30	YEF3-subfamily ABC family protein; predicted not to be a transporter; repressed in core stress response; mutation confers hypersensitivity to amphotericin B	0.20425
orf19.2184	orf19.2184	Putative fumarylacetoacetate hydrolase; clade-associated gene expression; rat catheter and Spider biofilm repressed	0.20425
orf19.2185	NSA1	Putative 66S pre-ribosomal particles conmponent; Hap43-induced; repressed by prostaglandins	0.204
orf19.2186	SEH1	Ortholog(s) have Seh1-associated complex, cytosol, fungal-type vacuole membrane, nuclear membrane, nuclear pore outer ring localization	0.204
orf19.2187	ALG7	Protein involved in cell wall mannan biosynthesis; mutation confers hypersensitivity to tunicamycin; transcript elevated in chk1, nik1, and sln1 homozygous null mutants; possibly essential gene, disruptants not obtained by UAU1 method	0.204
orf19.2190	VRP1	Verprolin-related protein involved in actin cytoskeleton organization and polarized morphogenesis; interacts with Wal1p and Myo5p; downregulated upon adherence to polystyrene	0.20375
orf19.2191	orf19.2191	Ortholog(s) have role in endocytic recycling, peptidyl-diphthamide biosynthetic process from peptidyl-histidine and cytosol, endosome, nucleus localization	0.2035
orf19.2192	GDH2	Putative NAD-specific glutamate dehydrogenase; fungal-specific; transcript regulated by Nrg1, Mig1, Tup1, and Gcn4; stationary phase enriched protein; flow model biofilm induced; Spider biofilm induced	0.2035
orf19.2193	PRS5	Putative 5-phospho-ribosyl-1(alpha)-pyrophosphate synthetase; Hap43-induced; repressed during core stress response	0.20325
orf19.2194	orf19.2194	Phosphorylated protein of unknown function	0.20325
orf19.2195	orf19.2195	Ortholog of Candida albicans WO-1 : CAWG_05881	0.20325
orf19.2196	orf19.2196	Ortholog(s) have ubiquitin binding activity and cytoplasm localization	0.20325
orf19.2197	orf19.2197	Has domain(s) with predicted N,N-dimethylaniline monooxygenase activity, NADP binding, flavin adenine dinucleotide binding activity and role in oxidation-reduction process	0.203
orf19.2198	FLC3	Protein involved in heme uptake; putative FAD transporter, similar to S. cerevisiae Flc3p	0.203
orf19.2199	PHO86	Putative endoplasmic reticulum protein; possibly adherence-induced	0.20275
orf19.22	orf19.22	Protein with homology to peroxisomal membrane proteins; Sef1p-, Sfu1p-, and Hap43p-regulated gene	0.20275
orf19.220	PIR1	1,3-beta-glucan-linked cell wall protein; N-mannosylated, O-glycosylated by Pmt1; cell wall defect in het mutant; Hog1/fluconazole/hypoxia induced; iron/Efg1/Plc1/temp regulated; flow model biofilm induced; hyphal, Spider biofilm repressed	0.2025
orf19.2200	orf19.2200	Protein of unknown function; rat catheter biofilm repressed	0.2025
orf19.2201	orf19.2201	Ortholog(s) have ribosome binding activity, role in mitochondrial respiratory chain complex III assembly, positive regulation of mitochondrial translation and mitochondrial ribosome localization	0.2025
orf19.2202	orf19.2202	Protein of unknown function; induced by alpha pheromone in SpiderM medium	0.2025
orf19.2203	orf19.2203	Ortholog of Candida albicans WO-1 : CAWG_05873	0.2025
orf19.2204	orf19.2204	Predicted membrane protein of unknown function; Spider biofilm induced	0.2025
orf19.2204.2	RHO2	Ortholog(s) have GTPase activity	0.20225
orf19.2208	orf19.2208	Ortholog(s) have role in response to salt stress and cytoplasm localization	0.20225
orf19.2209	YVC1	Putative vacuolar cation channel shock; repressed by alpha pheromone in SpiderM medium; flow model biofilm repressed	0.202
orf19.2210	orf19.2210	Protein of unknown function; Spider biofilm induced	0.202
orf19.2211	orf19.2211	Ortholog of C. dubliniensis CD36 : Cd36_21990, C. parapsilosis CDC317 : CPAR2_103660, Debaryomyces hansenii CBS767 : DEHA2F19756g and Pichia stipitis Pignal : PICST_61375	0.202
orf19.2212	orf19.2212	Ortholog of C. dubliniensis CD36 : Cd36_21980, Debaryomyces hansenii CBS767 : DEHA2F19734g, Pichia stipitis Pignal : psti_CGOB_00208 and Spathaspora passalidarum NRRL Y-27907 : spas_CGOB_00029	0.20125
orf19.2213	orf19.2213	Ortholog(s) have cytoplasm, nucleus localization	0.20075
orf19.2214	orf19.2214	Ortholog(s) have structural constituent of ribosome activity and mitochondrial large ribosomal subunit localization	0.2005
orf19.2215	GLE1	Putative nucleoporin; moderately induced at 42 degrees C	0.2005
orf19.2216	PDS5	Putative protein with a predicted role in establishment and maintenance of sister chromatid condensation and cohesion; cell-cycle regulated periodic mRNA expression	0.2005
orf19.2219	ORF298	Predicted ORF in retrotransposon Tca3; similar to Gag-Pol; a-specific transcript, alpha-factor induced; rat catheter biofilm repressed; mRNA binds She3	0.2005
orf19.2220	orf19.2220	Protein of unknown function; Hap43-repressed gene; by Rgt1; repressed in Spider biofilms by Bcr1, Tec1, Brg1, Rob1 and induced by Efg1, Ndt80; Spider biofilm induced	0.20025
orf19.2222	orf19.2222	Putative casein kinase; plasma membrane-localized	0.20025
orf19.2227	orf19.2227	Protein of unknown function; flow model biofilm induced; nitric oxide-repressed	0.2
orf19.2228	orf19.2228	Ortholog(s) have actin filament binding, actin monomer binding activity and role in actin cortical patch organization, actin filament depolymerization, actin filament severing, sequestering of actin monomers	0.2
orf19.2229	orf19.2229	Ortholog(s) have ubiquitin-protein ligase activity, role in protein ubiquitination, response to ethanol and cytoplasm, nucleus localization	0.19975
orf19.223	orf19.223	Putative serine/threonine protein kinase; Hap43-repressed; induced by prostaglandins; possibly an essential gene, disruptants not obtained by UAU1 method; flow model biofilm induced; Spider biofilm induced	0.1995
orf19.2230	orf19.2230	Putative pre-mRNA-splicing factor; decreased transcription is observed upon benomyl treatment	0.19925
orf19.2231	orf19.2231	Protein of unknown function; Spider biofilm induced	0.19925
orf19.2232	RPL11	Ribosomal protein; repressed by phagocytosis; colony morphology-related gene regulation by Ssn6; Hap43-induced; Spider biofilm repressed	0.199
orf19.2233	PRE2	Putative proteasome beta-5 subunit; macrophage-induced protein	0.19875
orf19.2236	FHL1	Fork-head transcription factor; forms a heterodimer with Ifh1 that is tethered to promoters by Tbf1; positively regulates rRNA and ribosomal protein gene transcription	0.1985
orf19.2237	SPR1	Putative GPI-anchored protein; similar but not orthologous to S. cerevisiae Spr1, a sporulation-specific exo-1,3-beta-glucanase; mutant is viable	0.1985
orf19.2237.1	orf19.2237.1	Ortholog of Slx9 required for pre-rRNA processing; associated with 90S pre-ribosome and 43S small ribosomal subunit precursor, interacts with U3 snoRNA in S. cerevisiae; gene has intron; Spider biofilm induced	0.19825
orf19.2238	LTE1	Protein similar to GDP/GTP exchange factors; repressed by alpha pheromone in SpiderM medium; flow model biofilm repressed	0.19825
orf19.2241	PST1	Putative 1,4-benzoquinone reductase; hyphal-induced; regulated by Cyr1, Ras1, Efg1, Nrg1, Rfg1, Tup1; Hap43-induced; Spider biofilm induced	0.19825
orf19.2242	PRB1	Endoprotease B; regulated by heat, carbon source (GlcNAc-induced), nitrogen, macrophage response, human neutrophils; similar to (does not replace) S. cerevisiae vacuolar B protease Prb1p; flow model biofilm induced; Spider biofilm induced	0.198
orf19.2244	orf19.2244	Similar to oxidoreductases and to S. cerevisiae Yjr096wp; Sfu1 repressed; induced by benomyl treatment, Ssr1; Hap43-repressed; flow model biofilm repressed	0.198
orf19.2245	YPT72	Vacuolar Rab small monomeric GTPase involved in vacuolar biogenesis; involved in filamentous growth and virulence	0.198
orf19.2246	orf19.2246	Ortholog(s) have cytosol, nucleus localization	0.198
orf19.2247	orf19.2247	Ortholog of C. parapsilosis CDC317 : CPAR2_406700, C. dubliniensis CD36 : Cd36_21220, Candida tenuis NRRL Y-1498 : CANTEDRAFT_127772 and Candida orthopsilosis Co 90-125 : CORT_0C06120	0.19775
orf19.2248	ARE2	Acyl CoA:sterol acyltransferase; uses cholesterol and oleoyl-CoA substrates; protoberberine derivative drug inhibits enzyme activity; ketoconazole-induced; Hap43-repressed; flow model biofilm induced; Spider biofilm induced	0.1975
orf19.2249	orf19.2249	Putative metalloprotease of the mitochondrial inner membrane; expression downregulated in an ssr1 null mutant	0.1975
orf19.225	orf19.225	Predicted 2-hydroxyacid dehydrogenase; Hap43-repressed gene	0.1975
orf19.2250	SPE3	Putative spermidine synthase; predicted role in pantothenate and spermidine biosynthesis; Spider biofilm repressed	0.1975
orf19.2251	AAH1	Adenine deaminase; purine salvage and nitrogen catabolism; colony morphology-related regulation by Ssn6; Hog1, CO2-induced; chlamydospore formation repressed in C. albicans and C. dubliniensis; rat catheter and F-12/CO2 biofilm induced	0.19725
orf19.2252	orf19.2252	Protein of unknown function; rat catheter biofilm repressed	0.19725
orf19.2253	orf19.2253	Protein of unknown function; expression regulated by white-opaque switch; repressed by alpha pheromone in SpiderM medium; Spider biofilm induced	0.197
orf19.2256	orf19.2256	Ortholog(s) have cytosol, nucleus localization	0.1965
orf19.2257	orf19.2257	Predicted ER protein involved in ER-nucleus signaling; Spider biofilm repressed	0.1965
orf19.2258	orf19.2258	Ortholog of C. dubliniensis CD36 : Cd36_21310, C. parapsilosis CDC317 : CPAR2_406650, Candida tenuis NRRL Y-1498 : CANTEDRAFT_130046 and Debaryomyces hansenii CBS767 : DEHA2F24134g	0.1965
orf19.2259	orf19.2259	Ortholog(s) have structural constituent of ribosome activity and mitochondrial large ribosomal subunit localization	0.19625
orf19.2260	orf19.2260	Putative transcription factor with zinc finger DNA-binding motif	0.19625
orf19.2261	orf19.2261	Ortholog(s) have RNA binding activity, role in mRNA splicing, via spliceosome and U2 snRNP, U2-type prespliceosome, cytosol localization	0.19625
orf19.2262	orf19.2262	Protein similar to quinone oxidoreductases; induced by benomyl treatment, nitric oxide; oxidative stress-induced via Cap1; stationary-phase enriched protein; Spider biofilm induced	0.196
orf19.2263	orf19.2263	Has domain(s) with predicted adenyl nucleotide binding activity	0.19575
orf19.2264	OLE2	Protein with similarity to fatty acid desaturase (stearoyl-CoA desaturase); homozygous null mutant shows decreased production of prostaglandin E2	0.19575
orf19.2265	orf19.2265	Ortholog(s) have role in positive regulation of transcription from RNA polymerase II promoter in response to amino acid starvation and SWI/SNF complex, cytosol localization	0.1955
orf19.2266	orf19.2266	Ortholog(s) have ATPase activity, DNA binding, nucleosome binding activity, role in chromatin remodeling and Isw1 complex localization	0.1955
orf19.2267	RFA2	Putative DNA replication factor A; RNA abundance regulated by cell cycle, tyrosol and cell density	0.1955
orf19.2268	RCK2	Predicted MAP kinase-activated protein kinase, similar to S. cerevisiae serine/threonine protein kinase Rck2p; induced by osmotic stress via Hog1p; macrophage/pseudohyphal-repressed; mutants are sensitive to rapamycin	0.19525
orf19.2269	orf19.2269	Putative 3-phosphoserine phosphatase; induced by benomyl or in azole-resistant strain that overexpresses MDR1; early-stage flow model biofilm induced; Spider biofilm repressed	0.19525
orf19.227	COX7	Putative cytochrome c oxidase; flucytosine induced; repressed by nitric oxide	0.19525
orf19.2270	SMF12	Ortholog of S. cerevisiae Smf1; manganese transporter; Gcn4-regulated; Hap43, alkaline induced; caspofungin repressed; mutants are viable	0.195
orf19.2272	AFT2	Putative Aft domain transcription factor; role in regulation of iron metabolism, oxidative stress, adhesion, hyphal growth, colony morphology, virulence; complements S. cerevisiae aft1 mutation; Spider biofilm induced	0.19425
orf19.2274	orf19.2274	Ortholog of C. dubliniensis CD36 : Cd36_21450, Candida tropicalis MYA-3404 : CTRG_01739 and Candida albicans WO-1 : CAWG_05814	0.194
orf19.2275	orf19.2275	Putative mitochondrial ribosomal protein; predicted role in aerobic respiration; Spider biofilm repressed	0.1935
orf19.2276	orf19.2276	Ortholog(s) have DNA-directed RNA polymerase activity, RNA-directed RNA polymerase activity	0.1935
orf19.2277	TPK2	cAMP-dependent protein kinase catalytic subunit; isoform of Tpk1; needed for epithelial cell damage, engulfment and oral (not systemic) virulence in mice; control of morphogenesis and stress response; rat catheter, Spider biofilm repressed	0.19325
orf19.2278	orf19.2278	Putative 20S proteasome assembly protein; filament induced; induced by alpha pheromone in SpiderM medium	0.19325
orf19.2280	ZCF10	Putative transcription factor with zinc cluster DNA-binding motif	0.19325
orf19.2281	orf19.2281	Ortholog(s) have mitochondrion localization	0.19325
orf19.2282	orf19.2282	Has domain(s) with predicted catechol 1,2-dioxygenase activity, ferric iron binding activity and role in catechol-containing compound metabolic process, oxidation-reduction process	0.19325
orf19.2283	DQD1	Putative 3-dehydroquinate dehydratase; ketoconazole-repressed; protein abundance downregulated by macrophages; flow model biofilm induced	0.1925
orf19.2284	orf19.2284	Protein with an FMN-binding domain; Hap43-repressed; flow model biofilm induced	0.1925
orf19.2285	orf19.2285	Protein of unknown function; transcription induced by benomyl treatment	0.1925
orf19.2286	orf19.2286	Putative deoxyhypusine hydroxylase; ketoconazole-induced; protein level decreases in stationary phase cultures; required for biofilm formation; Spider biofilm repressed	0.1925
orf19.2287	RPA12	Putative DNA-directed RNA polymerase I; induced upon adherence to polystyrene	0.19225
orf19.2288	CCT5	T-complex protein 1, epsilon subunit; protein present in exponential and stationary growth phase yeast cultures; Spider biofilm repressed	0.19225
orf19.2289	ARP3	Protein with Myo5p-dependent localization to cortical actin patches at hyphal tip; mutation confers hypersensitivity to cytochalasin D; Spider biofilm repressed	0.192
orf19.229	orf19.229	Ortholog(s) have ubiquitin-protein ligase activity, role in protein ubiquitination involved in ubiquitin-dependent protein catabolic process and chromosome, centromeric region, mitotic spindle pole body, nucleus localization	0.192
orf19.2290	TOR1	Protein similar to TOR family phosphatidylinositol kinases; mutation confers resistance to rapamycin; involved in regulation of ribosome biogenesis, starvation response, and adhesion	0.19175
orf19.2296	orf19.2296	Predicted mucin-like protein; ketoconazole-induced; fluconazole-repressed; induced in cyr1 mutant; colony morphology-related gene regulation by Ssn6; flow model biofilm induced; Spider biofilm induced	0.19125
orf19.2297	ARL3	Putative Ras superfamily GTPase; induced by nitric oxide independent of Yhb1p	0.19075
orf19.2298	WBP1	Putative oligosaccharyltransferase subunit; Spider biofilm repressed	0.19075
orf19.2299	orf19.2299	Ortholog(s) have protein tag activity and role in cell budding, cellular response to oxidative stress, invasive growth in response to glucose limitation, protein urmylation, tRNA wobble position uridine thiolation	0.19075
orf19.23	RTA3	Similar to S. cerevisiae Rta1 (role in 7-aminocholesterol resistance) and Rsb1 (flippase); putative drug-responsive regulatory site; induced by fluphenazine, estradiol, ketoconazole, caspofungin; rat catheter biofilm induced	0.1905
orf19.230	orf19.230	Ortholog of S. cerevisiae Pet111; a mitochondrial translational activator specific for the COX2 mRNA; Hap43-induced gene	0.1905
orf19.2301	orf19.2301	Ortholog(s) have role in proteasome regulatory particle assembly and cytosol, nucleus localization	0.19025
orf19.2302	orf19.2302	Ortholog(s) have enzyme regulator activity, role in cellular calcium ion homeostasis and integral to endoplasmic reticulum membrane localization	0.19
orf19.2303	FGR16	Protein lacking an ortholog in S. cerevisiae; transposon mutation affects filamentous growth; fluconazole-downregulated	0.18975
orf19.2304	orf19.2304	Protein similar to S. cerevisiae Gvp36p; transposon mutation affects filamentous growth	0.1895
orf19.2305	orf19.2305	Ortholog(s) have tubulin binding activity, role in tubulin complex assembly and prefoldin complex localization	0.1895
orf19.2306	orf19.2306	Ortholog(s) have acireductone dioxygenase (Ni2+-requiring) activity, role in L-methionine salvage from methylthioadenosine and cytosol, nucleus localization	0.1895
orf19.2307	orf19.2307	Ortholog(s) have role in mRNA cleavage, mRNA polyadenylation, mitotic sister chromatid segregation, regulation of G1/S transition of mitotic cell cycle and cytosol, mRNA cleavage and polyadenylation specificity factor complex localization	0.18925
orf19.2308	orf19.2308	Putative 6-phosphofructo-2-kinase; catalyzes synthesis of fructose-2,6-bisphosphate; Hap43-repressed; flow model, rat catheter and Spider biofilm induced	0.18925
orf19.2309	PET127	Protein with a predicted role in 5'-end processing of mitochondrial RNAs; ortholog of S. cerevisiae Pet127; Hap43-induced; rat catheter and Spider biofilm induced	0.18925
orf19.2309.2	RPL2	Putative 60S ribosomal protein L2; Hap43-induced gene; repressed in infected rabbit kidney in SC5314, but not NGY152, strain background; Spider biofilm repressed	0.189
orf19.231	APL2	Phosphorylated protein of unknown function; mutation confers hypersensitivity to toxic ergosterol analog	0.18825
orf19.2310	orf19.2310	Predicted single-stranded nucleic acid binding protein; flow model biofilm induced	0.18825
orf19.2310.1	RPL29	Ribosomal protein L29; induced upon germ tube formation; colony morphology-related gene regulation by Ssn6; intron in 5'-UTR; Spider biofilm repressed	0.188
orf19.2311	RPL82	Predicted ribosomal protein; genes encoding cytoplasmic ribosomal subunits, translation factors, and tRNA synthetases are downregulated upon phagocytosis by murine macrophage	0.188
orf19.2312	orf19.2312	Protein similar to ferric reductase Fre10p; possibly an essential gene, disruptants not obtained by UAU1 method	0.18725
orf19.2313	orf19.2313	Putative ortholog of S. cerevisiae Pex32 a peroxisomal integral membrane protein with a role in negative regulation of peroxisome size; Hap43-repressed gene	0.18725
orf19.2314	orf19.2314	Protein with a role in nucleolar integrity and processing of pre-rRNA; mutation confers hypersensitivity to 5-fluorocytosine (5-FC), 5-fluorouracil (5-FU), and tubercidin (7-deazaadenosine); Hap43-induced; Spider biofilm induced	0.18725
orf19.2315	orf19.2315	Putative transcription factor with bZIP DNA-binding motif	0.187
orf19.2317	orf19.2317	Protein of unknown function; induced by alpha pheromone in SpiderM medium	0.18675
orf19.2318.1	orf19.2318.1	Ortholog(s) have inositol phosphoceramide synthase regulator activity, role in inositolphosphoceramide metabolic process and inositol phosphoceramide synthase complex, integral to Golgi membrane localization	0.18675
orf19.2319	orf19.2319	Putative nucleolar protein with a predicted role in pre-rRNA processing; Hap43-induced gene; repressed in core stress response	0.18675
orf19.232	orf19.232	RNA polymerase II mediator complex subunit; possibly an essential gene, disruptants not obtained by UAU1 method	0.1865
orf19.2320	orf19.2320	Putative serine/threonine-protein kinase; possibly an essential gene, disruptants not obtained by UAU1 method	0.186
orf19.2322.3	ERP5	Protein involved in ER to Golgi transport; rat catheter and Spider biofilm repressed	0.1855
orf19.2324	UBA4	Putative ubiquitin activating protein; Hap43-repressed; induced by prostaglandins; clade-associated gene expression	0.1855
orf19.2325	orf19.2325	Ortholog(s) have RNA polymerase III type 1 promoter sequence-specific DNA binding and RNA polymerase III type 1 promoter sequence-specific DNA binding TFIIIB recruiting transcription factor activity, more	0.18525
orf19.2326	orf19.2326	Ortholog(s) have role in chromatin silencing at silent mating-type cassette, double-strand break repair via homologous recombination, intra-S DNA damage checkpoint, mitotic sister chromatid cohesion and nucleus localization	0.18525
orf19.2328	orf19.2328	Ortholog of C. dubliniensis CD36 : Cd36_10220, C. parapsilosis CDC317 : CPAR2_210530, Candida tenuis NRRL Y-1498 : CANTEDRAFT_105553 and Debaryomyces hansenii CBS767 : DEHA2G14432g	0.185
orf19.2329.1	RPS17B	Ribosomal protein 17B; downregulated upon phagocytosis by murine macrophages; Hap43-induced; Spider biofilm repressed	0.185
orf19.233.1	HRT1	Ortholog of S. cerevisiae Hrt1; component of a nuclear ubiquitin-protein ligase complex involved in cell cycle control; induced by hydroxyurea; Spider biofilm induced	0.18475
orf19.2330	orf19.2330	Putative U3 snoRNA-associated protein; Hap43-induced; transposon mutation affects filamentous growth; repressed by prostaglandins	0.1845
orf19.2331	ADA2	Zinc finger and homeodomain transcriptional coactivator; role in cell wall integrity and in sensitivity to caspofungin; required for the normal transcriptional response to caspofungin; required for yeast cell adherence to silicone substrate	0.1845
orf19.2332	orf19.2332	Ortholog of C. parapsilosis CDC317 : CPAR2_210560, C. dubliniensis CD36 : Cd36_10180, Candida orthopsilosis Co 90-125 : CORT_0A09890 and Candida tropicalis MYA-3404 : CTRG_04072	0.18425
orf19.2333	orf19.2333	Ortholog(s) have role in retrograde transport, endosome to Golgi and cytosol, late endosome, nucleus localization	0.18375
orf19.2334	BIG1	Endoplasmic reticulum (ER) protein; ortholog of S. cerevisiae Big1; required for beta-1,6-glucan synthesis, filamentation, adhesion, and virulence; rat catheter biofilm repressed	0.18325
orf19.2335	orf19.2335	Putative aspartyl aminopeptidase; stationary phase enriched protein; mutation confers hypersensitivity to 5-fluorouracil (5-FU); Hog1-induced; planktonic growth-induced; rat catheter and Spider biofilm repressed	0.183
orf19.2336	orf19.2336	Pry family pathogenesis-related protein; predicted to be extracellular	0.183
orf19.2337	ALP1	Cystine transporter; present in pathogenic yeasts (no human or murine homolog); Spider biofilm induced	0.18275
orf19.234	PHA2	Putative prephenate dehydratase; Hap43p-repressed gene; expression downregulated in an ssr1 null mutant	0.18275
orf19.2340	CDC48	Putative microsomal ATPase; plasma membrane-localized; regulated by Gcn2 and Gcn4; induced by amino acid starvation (3-AT); macrophage/pseudohyphal-repressed; protein levels decrease in stationary phase yeast; Spider biofilm repressed	0.1825
orf19.2341	HNT1	Protein with similarity to protein kinase C inhibitor-I; protein level decreases in stationary phase cultures	0.18225
orf19.2342	SFT2	Putative membrane protein; transcript regulated by Mig1; Spider biofilm induced	0.18225
orf19.2343	VPS23	ESCRT I protein sorting complex protein; involved in proteolytic activation of Rim101, which regulates pH response; ortholog of S. cerevisiae Stp22/Vps23	0.182
orf19.2344	ASR1	Heat shock protein; transcript regulated by cAMP, osmotic stress, ciclopirox olamine, ketoconazole; repressed by Cyr1, Ras1; colony morphology-related regulated by Ssn6; stationary phase enriched; Hap43-induced; Spider biofilm induced	0.182
orf19.2346	orf19.2346	Putative protein of unknown function, transcription is positively regulated by Tbf1p	0.18175
orf19.2347	MNN2	Alpha-1,2-mannosyltransferase; similar to S. cerevisiae Mnn2; role in cell wall integrity, temperature sensitivity; iron utilization in low iron; Tn mutation affects filamentous growth; filament induced; increased chitin exposes beta-glucan	0.1815
orf19.2350	orf19.2350	Protein similar to S. cerevisiae Yor378w; MFS family transporter; transposon mutation affects filamentous growth; null mutants are viable; fungal-specific (no human or murine homolog)	0.18125
orf19.2351	NIT3	Putative nitrilase; regulated by Gcn2p and Gcn4p; protein present in exponential and stationary growth phase yeast cultures	0.181
orf19.2352	orf19.2352	Ortholog(s) have mitochondrion localization	0.181
orf19.2356	CRZ2	C2H2 transcription factor; crz1 not crz2 null mutation suppresses fluconazole resistance of homozygous cka2 null; Rim101-repressed at pH 8; required for yeast cell adherence to silicone substrate; Spider biofilm induced	0.181
orf19.236	RPL9B	Ribosomal protein L9; repressed upon phagocytosis by murine macrophages; repressed by nitric oxide; protein levels decrease in stationary phase; Hap43-induced; Spider biofilm repressed	0.181
orf19.2360	URA2	Putative bifunctional carbamoylphosphate synthetase-aspartate transcarbamylase; flucytosine induced; macrophage/pseudohyphal-induced; 5'-UTR intron; flow model biofilm repressed	0.18075
orf19.2361	SPT10	Ortholog(s) have sequence-specific DNA binding activity	0.18075
orf19.2362	orf19.2362	Putative 90S preribosome component; Hap43p-induced gene; possibly an essential gene, disruptants not obtained by UAU1 method	0.1805
orf19.2363	orf19.2363	Ortholog(s) have thiosulfate sulfurtransferase activity and mitochondrion localization	0.1805
orf19.2364	MIS11	Predicted mitochondrial C1-tetrahydrofolate synthase precursor; putative protein of glycine catabolism; repressed by Efg1; fluconazole-induced; stationary phase enriched protein; rat catheter and Spider biofilm repressed	0.18
orf19.2365	POL2	DNA polymerase epsilon; transcript induced by interaction with macrophage; transcript is regulated by Tup1; periodic mRNA expression, peak at cell-cycle G1/S phase	0.18
orf19.2366	orf19.2366	Has domain(s) with predicted DNA binding activity and role in DNA integration	0.18
orf19.2367	orf19.2367	Putative protein of unknown function; Hap43-induced; repressed by Rim101; Spider biofilm induced	0.17975
orf19.2368	orf19.2368	Predicted component of U5 snRNP; Spider biofilm induced	0.1795
orf19.2369	orf19.2369	Ortholog(s) have ATP binding, DNA replication origin binding activity	0.1795
orf19.2369.1	ATX1	Putative cytosolic copper metallochaperone; flucytosine induced; Ssr1-repressed; rat catheter biofilm induced	0.17925
orf19.2370	DSL1	Protein similar to S. cerevisiae Dsl1p, which is a member of the t-SNARE complex of the endoplasmic reticulum	0.179
orf19.2376	orf19.2376	Has domain(s) with predicted DNA 5'-adenosine monophosphate hydrolase activity, DNA binding activity and role in DNA repair	0.179
orf19.2378	orf19.2378	Ortholog(s) have role in syncytium formation by plasma membrane fusion, vacuolar proton-transporting V-type ATPase complex assembly and integral to endoplasmic reticulum membrane localization	0.179
orf19.2379	NOT4	Putative E3 ubiquitin-protein ligase; required for maintenance, but not induction, of hyphal development; homozygous null mutant is avirulent in mouse systemic infection despite persistence in host; repressed in rat oral candidiasis	0.179
orf19.238	CCP1	Cytochrome-c peroxidase N terminus; Rim101, alkaline pH repressed; induced in low iron or by macrophage interaction; oxygen-induced activity; regulated by Sef1, Sfu1, and Hap43; Spider biofilm induced; rat catheter biofilm repressed	0.17875
orf19.2381	orf19.2381	Protein of unknown function; possibly an essential gene, disruptants not obtained by UAU1 method	0.17875
orf19.2382	orf19.2382	Protein similar to isoleucyl-tRNA synthetase; isoleucyl-tRNA synthetase is the target of drugs including the cyclic beta-amino acid icofungipen/PLD-118/BAY-10-8888 and mupirocin	0.1785
orf19.2383	YKU80	Yku70p-Yku80p Ku complex subunit involved in nonhomologous end joining during double-strand break repair repair; Hap43-repressed gene; flow model biofilm induced	0.17825
orf19.2384	MTG1	Putative mitochondrial GTPase; likely essential for respiratory competence and in large ribosomal subunit assembly; mitochondrial translation; Spider biofilm induced	0.178
orf19.2385	KTI12	Protein similar to S. cerevisiae Kti12p, which associates with Elongator complex; has a role in resistance to killer toxin; predicted Kex2p substrate; Hap43p-induced gene	0.178
orf19.2386	orf19.2386	Ortholog(s) have role in endonucleolytic cleavage in 5'-ETS of tricistronic rRNA transcript (SSU-rRNA, 5.8S rRNA and LSU-rRNA), more	0.1775
orf19.2387	orf19.2387	Putative tRNA-Pro synthetase; genes encoding ribosomal subunits, translation factors, and tRNA synthetases are downregulated upon phagocytosis by murine macrophage	0.1775
orf19.2389	orf19.2389	Ortholog(s) have DNA replication origin binding, single-stranded DNA binding activity	0.17725
orf19.239	orf19.239	Putative ATP-dependent helicase; induced by nitric oxide	0.177
orf19.2391	orf19.2391	Putative protein of unknown function; Hap43p-repressed gene; S. cerevisiae ortholog YKR023W localizes to mitochondria	0.17675
orf19.2392	orf19.2392	Ortholog of C. dubliniensis CD36 : Cd36_28460, Debaryomyces hansenii CBS767 : DEHA2B00704g, Pichia stipitis Pignal : PICST_43964 and Spathaspora passalidarum NRRL Y-27907 : spas_CGOB_00057	0.17675
orf19.2393	orf19.2393	Putative transcription factor with zinc finger DNA-binding motif	0.17625
orf19.2394	orf19.2394	Ortholog(s) have cytoplasm, nucleus localization	0.17625
orf19.2395	IME2	Putative serine/threonine protein kinase; mutation confers hypersensitivity to amphotericin B	0.176
orf19.2396	IFR2	Zinc-binding dehydrogenase; induced by benomyl, ciclopirox olamine, alpha pheromone, Hap43; regulated by oxidative stress via Cap1, osmotic stress via Hog1; protein present in exponential and stationary phase; rat catheter biofilm repressed	0.176
orf19.2397	orf19.2397	Predicted membrane transporter, member of the anion:cation symporter (ACS) family, major facilitator superfamily (MFS); amphotericin B, caspofungin repressed; Hap43p-repressed	0.17575
orf19.2397.3	orf19.2397.3	Putative aminotransferase; Hap43-repressed; homozygous Tn insertion decreases colony wrinkling in filament-inducing conditions, does not block true hypha formation in liquid media; rat catheter and Spider biofilm induced	0.1755
orf19.2398	orf19.2398	Protein of unknown function; Hap43-repressed; transcript increased in azole-resistant strain overexpressing CDR1 and CDR2; possibly regulated by Tac1; induced by Mnl1 in weak acid stress; flow model biofilm induced; Spider biofilm induced	0.1755
orf19.2399	orf19.2399	Putative transcription factor with zinc finger DNA-binding motif; similar to bacterial DnaJ; induced in low iron	0.1755
orf19.24	RTA2	Flippase; sphingolipid long chain base release; mediates calcineurin-dependent resistance to azoles; stress-associate; Plc1, Ca2+, calcineurin-regulated; ketoconazole, caspofungin induced; Spider biofilm induced; flow biofilm repressed	0.1755
orf19.240	PAM17	Predicted component of the presequence translocase-associated import motor (PAM complex) involved in protein import into mitochondrial matrix	0.17525
orf19.2400	orf19.2400	Ortholog(s) have role in mRNA splicing, via spliceosome, maturation of SSU-rRNA, positive regulation of ATPase activity, positive regulation of helicase activity	0.17525
orf19.2401	orf19.2401	Ortholog(s) have cysteine-type endopeptidase activity	0.17525
orf19.2402	SSU72	Ortholog(s) have CTD phosphatase activity, protein tyrosine phosphatase activity	0.175
orf19.2404	orf19.2404	Ortholog(s) have RNA binding, ribonuclease MRP activity, ribonuclease P activity and role in intronic box C/D snoRNA processing, mRNA cleavage, rRNA processing, tRNA processing	0.175
orf19.2406	orf19.2406	Ortholog(s) have role in microautophagy, positive regulation of TOR signaling cascade, positive regulation of transcription from RNA polymerase II promoter	0.175
orf19.2407	DPS1-1	Putative tRNA-Asp synthetase; genes encoding ribosomal subunits, translation factors, tRNA synthetases are downregulated upon phagocytosis by murine macrophage; protein enriched in stationary phase yeast cultures	0.17475
orf19.2408	orf19.2408	Ortholog(s) have tRNA methyltransferase activity, role in tRNA methylation, wybutosine biosynthetic process and cytosol, nucleus localization	0.17475
orf19.2410	SYS3	Protein similar to S. cerevisiae Sys3p; putative role in endosome-Golgi vesicle docking; upregulated in biofilm; induced upon adherence to polystyrene	0.17475
orf19.2411	SYN8	Putative endosomal SNARE; role in protein transport; rat catheter and Spider biofilm induced	0.1745
orf19.2412	orf19.2412	Ortholog(s) have role in late endosome to vacuole transport via multivesicular body sorting pathway and Golgi apparatus, Vps55/Vps68 complex, fungal-type vacuole membrane, late endosome localization	0.17425
orf19.2414	orf19.2414	Ortholog of S. cerevisiae Mpm1; a mitochondrial intermembrane space protein of unknown function; Hap43-repressed; Spider biofilm induced	0.17425
orf19.2415	orf19.2415	Ortholog(s) have role in mitochondrial translation and mitochondrion localization	0.174
orf19.2416.1	MLC1	Microtubule-dependent localized protein; at Spitzenkorper and cytokinetic ring in hyphae; cell-cycle dependent localization to tip polarisome, bud neck in yeast and pseudohyphae; sumoylation target; rat catheter, Spider biofilm repressed	0.174
orf19.2417	SMC5	Protein similar to S. cerevisiae Smc5p, which is involved in DNA repair; transposon mutation affects filamentous growth	0.174
orf19.2418	orf19.2418	Ortholog of C. dubliniensis CD36 : Cd36_28190, C. parapsilosis CDC317 : CPAR2_802530, Candida tenuis NRRL Y-1498 : CANTEDRAFT_109615 and Debaryomyces hansenii CBS767 : DEHA2A12650g	0.174
orf19.2419	orf19.2419	Ortholog of S. cerevisiae Dom34; a protein that facilitates ribosomal subunit dissociation when translation is stalled; peloto ortholog; Hap43-repressed gene	0.17375
orf19.242	SAP8	Secreted aspartyl protease; regulated by growth phase, temperature, white-opaque switch; highly expressed in opaque cells and upon deep epidermal invasion; greater expression in vaginal than oral infection; prominent role in biofilms	0.17375
orf19.242.2	orf19.242.2	Ortholog(s) have endoplasmic reticulum localization	0.1735
orf19.2422	ARC1	Putative G4 nucleic acid binding protein; macrophage/pseudohyphal-repressed; protein enriched in stationary phase yeast-form cultures; Spider biofilm repressed	0.1735
orf19.2423	ZCF11	Zn(II)2Cys6 transcription factor; required for wild-type filamentous growth; mRNA binds She3	0.1735
orf19.2425	HGT18	Putative glucose transporter of the major facilitator superfamily; the C. albicans glucose transporter family comprises 20 members; 12 probable membrane-spanning segments; expressed in rich medium with 2% glucose	0.1735
orf19.2426	orf19.2426	Predicted HD domain metal dependent phosphohydrolase; Spider biofilm repressed	0.17325
orf19.2429	orf19.2429	Protein of unknown function; induced by alpha pheromone in SpiderM medium	0.1725
orf19.243	OXR1	Ortholog(s) have role in cellular response to oxidative stress and cytosol, mitochondrion, nucleus localization	0.17225
orf19.2430	orf19.2430	Ortholog of Candida albicans WO-1 : CAWG_00792	0.17225
orf19.2431	orf19.2431	Dubious open reading frame, only conserved in Candida dubliniensis; induced by alpha pheromone in SpiderM medium; mRNA binds She3; Spider biofilm induced; flow model biofilm repressed	0.17225
orf19.2432	HAC1	bZIP transcription factor; role in unfolded protein response and control of morphology; transcript undergoes atypical splicing at C terminus under ER stress; induced during mating and by caspofungin; mRNA binds She3; Spider biofilm induced	0.17225
orf19.2433	orf19.2433	Ortholog of C. dubliniensis CD36 : Cd36_05790, C. parapsilosis CDC317 : CPAR2_103730, Pichia stipitis Pignal : PICST_28344, Candida tropicalis MYA-3404 : CTRG_04275 and Candida albicans WO-1 : CAWG_00795	0.17175
orf19.2434	NPL4	Putative ubiquitin-binding protein; regulated by Gcn2p and Gcn4p	0.17125
orf19.2435	MSI3	Essential HSP70 family protein; required for fluconazole resistance and calcineurin-dependent transcription; interacts with Cgr1; transcript regulated by iron; rat catheter biofilm induced; farnesol repressed in biofilm; sumoylation target	0.171
orf19.2436	orf19.2436	Predicted protein serine/threonine kinase; Spider biofilm induced	0.1705
orf19.2437	ARC35	Putative ARP2/3 complex subunit; shows colony morphology-related gene regulation by Ssn6p; mutation confers hypersensitivity to cytochalasin D	0.1705
orf19.2438	orf19.2438	Ortholog(s) have mitochondrion, ribosome localization	0.16975
orf19.2439	orf19.2439	Fatty acid biosynthetic protein; shows colony morphology-related gene regulation by Ssn6p; protein newly produced during adaptation to the serum	0.1695
orf19.2439.1	orf19.2439.1	Ortholog(s) have ubiquinol-cytochrome-c reductase activity, role in aerobic respiration, mitochondrial electron transport, ubiquinol to cytochrome c and mitochondrial respiratory chain complex III localization	0.1695
orf19.244	DCG1	Protein of unknown function; ortholog of S. cerevisiae Dcg1; transcript regulated by Nrg1 and Mig1	0.1695
orf19.2440	orf19.2440	S. cerevisiae ortholog Rtt101 is a cullin subunit of E3 ubiquitin ligase complex with a role in anaphase progression; induced by alpha pheromone in SpiderM medium	0.16925
orf19.2442	orf19.2442	Ortholog of S. cerevisiae Shg1; a COMPASS (Set1C) complex subunit that methylates histone H3 on lysine 4 and is required in transcriptional silencing near telomeres; repressed in an azole-resistant strain overexpressing MDR1	0.16925
orf19.2443	RGD1	GTPase activator protein; transcript induced in low iron; alkaline upregulated; localized to the bud emergence area in G1 phase and in the bud tip during S and G2 phases	0.16925
orf19.2444	CHS7	Protein required for wild-type chitin synthase III activity; similar to (but not functional homolog of) S. cerevisiae Chs7p, which effects ER export of Chs3p; induced cyr1 mutant hyphae and ras1 yeast-form cells; Spider biofilm induced	0.16875
orf19.2445	orf19.2445	Putative dicarboxylic amino acid permease; fungal-specific (no human or murine homolog); induced by alpha pheromone in SpiderM medium	0.16875
orf19.2446	orf19.2446	Ortholog(s) have cell division site, cell tip, cytoplasm, nucleus localization	0.1685
orf19.2447	orf19.2447	Putative Type II phosphatidylinositol 4-kinase; Ssr1-repressed; flow model biofilm repressed	0.1685
orf19.2449	orf19.2449	Putative adhesin-like protein; macrophage-induced gene	0.1685
orf19.245	DDC1	Putative DNA damage checkpoint protein; transcript induced during filamentous growth; regulated by Nrg1, Tup1	0.16825
orf19.2451	PGA45	Putative GPI-anchored cell wall protein; repressed in core caspofungin response; Hog1-induced; regulated by Ssn6; Mob2-dependent hyphal regulation; flow model biofilm induced	0.16825
orf19.2452	orf19.2452	Protein of unknown function; induced in high iron; repressed in core caspofungin response; ketoconazole-repressed; colony morphology-related gene regulation by Ssn6; possibly subject to Kex2 processing	0.16825
orf19.2454	PHO87	Putative phosphate permease; transcript repressed by Rim101 at pH 8; regulated by white-opaque switch; caspofungin repressed; virulence-group-correlated expression; flow model biofilm induced	0.168
orf19.2455	orf19.2455	Ortholog(s) have gamma-glutamyltransferase activity, omega peptidase activity, role in glutathione catabolic process and cytoplasm, nucleus localization	0.168
orf19.2457	orf19.2457	Protein of unknown function; induced during chlamydospore formation in both C. albicans and C. dubliniensis; Spider biofilm induced	0.168
orf19.2458	SIP5	Protein of unknown function; flow model, rat catheter and Spider biofilm induced	0.1675
orf19.2459	orf19.2459	Protein of unknown function; mRNA binds to She3; Hap43 repressed gene; Spider biofilm induced	0.16725
orf19.246	orf19.246	Predicted metalloendopeptidase; Spider biofilm induced	0.16725
orf19.2460	orf19.2460	Protein of unknown function; substrate for Kex2 processing in vitro; repressed by alpha pheromone in SpiderM medium; Spider biofilm induced; Bcr1-repressed in a/a RPMI biofilms	0.167
orf19.2461	PRN4	Protein with similarity to pirins; induced by benomyl treatment; flow model biofilm repressed	0.167
orf19.2462	PRN3	Protein similar to pirin; induced by Mnl1 under weak acid stress; Hap43-repressed; Spider biofilm induced	0.16675
orf19.2463	PRN2	Protein similar to pirin; Hap43p-repressed gene	0.16675
orf19.2465	POL32	Putative subunit of DNA polymerase delta, involved in chromosomal DNA replication; cell-cycle regulated periodic mRNA expression	0.1665
orf19.2467	PRN1	Protein with similarity to pirins; induced by benomyl and in response to alpha pheromone in SpiderM medium; transcript induced by Mnl1 in weak acid stress; rat catheter and Spider biofilm induced	0.1665
orf19.2468	orf19.2468	Ortholog(s) have trans-aconitate 3-methyltransferase activity and cytosol, nucleus localization	0.16625
orf19.2469	RAD10	Ortholog of S. cerevisiae Rad10, an endonuclease involved in nucleotide excision repair; mutant is extremely sensitive to UV irradiation; transcript repressed in alkaline conditions	0.16625
orf19.247	orf19.247	Ortholog(s) have role in endosome organization, regulation of protein localization and BLOC-1 complex, endosome localization	0.166
orf19.2471	GIM5	Putative heterohexameric cochaperone prefoldin complex subunit; macrophage/pseudohyphal-repressed gene and macrophage-induced protein	0.166
orf19.2472	orf19.2472	Ortholog of S. pombe replication termination factor Rtf2; Spider biofilm induced	0.16575
orf19.2473	orf19.2473	Putative RSC chromatin remodeling complex component; decreased transcription is observed upon fluphenazine treatment or in an azole-resistant strain that overexpresses CDR1 and CDR2	0.16575
orf19.2474	PRC3	Putative carboxypeptidase Y precursor; transcript regulated by Nrg1 and Mig1; regulated by Gcn2 and Gcn4	0.1655
orf19.2475	PGA26	GPI-anchored adhesin-like protein of the cell wall; role in cell wall integrity; required for normal virulence; induced in high iron and during cell wall regeneration; Hap43-repressed	0.1655
orf19.2476	orf19.2476	Ortholog(s) have histone demethylase activity (H3-trimethyl-K4 specific) activity	0.1655
orf19.2478	orf19.2478	Ortholog of C. dubliniensis CD36 : Cd36_05410, C. parapsilosis CDC317 : CPAR2_107480, Candida tenuis NRRL Y-1498 : CANTEDRAFT_94695 and Debaryomyces hansenii CBS767 : DEHA2D02288g	0.1655
orf19.2478.1	orf19.2478.1	60S ribosomal protein L7; snoRNA snR39b encoded within the 2nd intron	0.1655
orf19.2479	UGA4	Putative gamma-aminobutyric acid/polyamine permease; nitrogen catabolite repressed gene, induced in absence of preferred N sources; transcriptionally induced upon phagocytosis by macrophage; gene regulation by nitrogen source requires Gat1p	0.16525
orf19.248	APL5	Ortholog of S. cerevisiae and S. pombe Apl5; subunit of the AP-3 adaptor complex involved in Golgi-to-vacuole transport; phosphorylated protein; mutant is viable;	0.16525
orf19.2480.1	AUT7	Putative autophagosome protein; macrophage/pseudohyphal-repressed; alternatively spliced intron in 5' UTR; Spider biofilm induced	0.16525
orf19.2481	orf19.2481	Protein of unknown function; Spider biofilm induced	0.165
orf19.2483	RIM1	Putative single-stranded DNA-binding protein; protein level decreases in stationary phase cultures; rat catheter biofilm repressed	0.165
orf19.2484	orf19.2484	Has domain(s) with predicted peptidase activity and role in proteolysis	0.16425
orf19.2485	orf19.2485	Ortholog(s) have structural constituent of nuclear pore activity and role in chromosome segregation, mitotic spindle assembly checkpoint, nuclear pore complex assembly, protein targeting to nuclear inner membrane	0.16425
orf19.2487	orf19.2487	Protein with a predicted phosphoribulokinase/uridine kinase domain; Spider biofilm induced	0.164
orf19.2488	FAL1	eIF4A subfamily of DEAD-box ATP-dependent RNA helicases; predicted nucleolar protein required for maturation of 18S rRNA; Spider biofilm induced	0.164
orf19.2489	orf19.2489	Putative karyopherin beta; repressed by nitric oxide	0.1635
orf19.2492	STE3	Protein similar to S. cerevisiae Ste3p, the receptor for a-factor mating pheromone; alpha mating-type-specific transcription	0.1635
orf19.2494	orf19.2494	Ortholog(s) have glutaminyl-tRNA synthase (glutamine-hydrolyzing) activity, role in glutaminyl-tRNAGln biosynthesis via transamidation, mitochondrial translation and glutamyl-tRNA(Gln) amidotransferase complex, mitochondrion localization	0.16325
orf19.2495	GSL1	Beta-1,3-glucan synthase subunit; 10 predicted transmembrane regions; caspofungin induced; repressed by yeast-to-hypha transition; young biofilm repressed, induced by biofilm drug exposure; Bcr1-repressed in RPMI a/a biofilms	0.16325
orf19.2496	ATO2	Putative fungal-specific transmembrane protein; fluconazole repressed, Hap43-repressed; flow model biofilm induced; Spider biofilm induced	0.16325
orf19.2498	orf19.2498	Predicted ubiquitin-protein ligase; Hap43-repressed gene; oxidative stress-induced via Cap1; flow model biofilm induced	0.163
orf19.2499	orf19.2499	Putative peptidyl-prolyl cis-trans isomerase	0.16275
orf19.25	orf19.25	Ortholog(s) have tRNA (guanine) methyltransferase activity, role in tRNA methylation and cytoplasm, nucleolus localization	0.1625
orf19.250	SLC1	Putative fatty acyltransferase; protein repressed during the mating process	0.1625
orf19.2500	orf19.2500	Has domain(s) with predicted transferase activity and role in biosynthetic process	0.1625
orf19.2501	FLC1	Protein involved in heme uptake; putative FAD transporter, similar to S. cerevisiae Flc1; regulated by iron; macrophage-induced; mutant defective in filamentous growth; Spider biofilm induced	0.16225
orf19.2503	orf19.2503	Ortholog of S. cerevisiae : YGL138C, C. glabrata CBS138 : CAGL0H08910g, C. dubliniensis CD36 : Cd36_80910, C. parapsilosis CDC317 : CPAR2_102230 and Candida tenuis NRRL Y-1498 : CANTEDRAFT_109984	0.16175
orf19.2504	BMS1	Putative GTPase; Hap43-induced gene; mutation confers resistance to 5-fluorocytosine (5-FC); flucytosine induced; repressed by prostaglandins; Spider biofilm induced	0.1615
orf19.2505	orf19.2505	Ortholog of Candida albicans WO-1 : CAWG_02437	0.1615
orf19.2506	orf19.2506	Protein of unknown function; opaque-specific transcript; induced during chlamydospore formation in both C. albicans and C. dubliniensis; Hog1-repressed; Spider biofilm induced	0.1615
orf19.2507	ARP9	Protein similar to S. cerevisiae Arp3p, a component of the Arp2/3 complex involved in actin-dependent processes; likely to be essential for growth, based on an insertional mutagenesis strategy	0.1615
orf19.2508	PRM9	Protein described a similar to S. cerevisiae Prm9; not the ortholog though; mutant is viable	0.16075
orf19.2509	orf19.2509	Ortholog of C. parapsilosis CDC317 : CPAR2_401850, C. dubliniensis CD36 : Cd36_80970, Lodderomyces elongisporus NRLL YB-4239 : LELG_04407 and Candida orthopsilosis Co 90-125 : CORT_0E01890	0.1605
orf19.251	GLX3	Glutathione-independent glyoxalase; binds human immunoglobulin E; alkaline, fluconazole, Hog1 repressed; hypoxia, oxidative stress via Cap1, Hap43 induced; stationary-phase enriched; rat catheter, Spider biofilm induced	0.16025
orf19.2510	orf19.2510	Ortholog(s) have role in protein folding, tubulin complex assembly	0.16
orf19.2511.1	MRPL33	Putative mitochondrial ribosomal protein of the large subunit; Ssr1-repressed; rat catheter biofilm induced	0.16
orf19.2512	orf19.2512	Ortholog of C. dubliniensis CD36 : Cd36_81000, C. parapsilosis CDC317 : CPAR2_103050, Candida tenuis NRRL Y-1498 : CANTEDRAFT_116326 and Debaryomyces hansenii CBS767 : DEHA2G01958g	0.16
orf19.2513	orf19.2513	Ortholog of C. dubliniensis CD36 : Cd36_81010, C. parapsilosis CDC317 : CPAR2_103060, Candida tenuis NRRL Y-1498 : CANTEDRAFT_127339 and Debaryomyces hansenii CBS767 : DEHA2G01936g	0.15975
orf19.2514	orf19.2514	Predicted methyltransferase; rat catheter biofilm induced	0.15975
orf19.2515	orf19.2515	ZZ-type zinc finger protein; rat catheter and Spider biofilm induced	0.1595
orf19.2516	orf19.2516	Has domain(s) with predicted role in cell redox homeostasis	0.1595
orf19.2517	orf19.2517	Predicted membrane transporter, member of the drug:proton antiporter (12 spanner) (DHA1) family, major facilitator superfamily (MFS)	0.1595
orf19.2518	orf19.2518	Ortholog(s) have ATPase activator activity, soluble NSF attachment protein activity	0.1595
orf19.2519	orf19.2519	Ortholog(s) have role in chromosome segregation and nuclear MIS12/MIND complex localization	0.1595
orf19.252	orf19.252	Protein of unknown function; S. cerevisiae ortholog Fmp37 which localizes to mitochondria; Hap43-repressed; Spider biofilm repressed	0.1595
orf19.2520	orf19.2520	Ortholog(s) have structural constituent of ribosome activity and mitochondrial small ribosomal subunit localization	0.15925
orf19.2521	orf19.2521	Ortholog of C. dubliniensis CD36 : Cd36_26390, Debaryomyces hansenii CBS767 : DEHA2C05302g, Pichia stipitis Pignal : PICST_68531 and Spathaspora passalidarum NRRL Y-27907 : SPAPADRAFT_59916	0.15925
orf19.2524	MGE1	Putative mitochondrial matrix cochaperone; macrophage/pseudohyphal-repressed	0.159
orf19.2525	LYS12	Homoisocitrate dehydrogenase; catalyzes 4th step in the alpha-aminoadipate pathway of lysine biosynthesis; clade-associated gene expression; protein level decreases in stationary phase cultures; Spider biofilm repressed	0.159
orf19.2527	orf19.2527	Putative protein of unknown function; Hap43-induced; required for normal biofilm growth; F-12/CO2 early biofilm induced	0.159
orf19.2528	orf19.2528	Putative RNA polymerase III transcription factor (TFIIIB) subunit; flucytosine repressed	0.15875
orf19.2529	orf19.2529	Ortholog of S. cerevisiae Gpa15; involved in the synthesis of glycosylphosphatidylinositol (GPI) anchors; shuman Pig-H, which is also involved in GPI assembly; Spider biofilm induced	0.15875
orf19.2530	orf19.2530	Dubious open reading frame	0.1585
orf19.2531	CSP37	Hyphal cell wall protein; role in progression of mouse systemic infection; predicted P-loop, divalent cation binding, N-glycosylation sites; expressed in yeast and hyphae; hyphal downregulated; stationary-phase enriched; GlcNAc-induced	0.15825
orf19.2532	PRS	Putative prolyl-tRNA synthetase; monofunctional Class II synthetase; gene is constitutively expressed	0.15825
orf19.2533.1	orf19.2533.1	Protein with a predicted role in protein translocation from the endoplasmic reticulum	0.158
orf19.2534	PIN4	Protein with similarity to S. cerevisiae Pin4p; transposon mutation affects filamentous growth	0.158
orf19.2537	orf19.2537	Protein of unknown function; transcript detected on high-resolution tiling arrays	0.158
orf19.2538	PTC2	Protein phosphatase of the Type 2C-related family (serine/threonine-specific) with a potential role in DNA damage checkpoint control; localizes to both cytoplasm and mitochondria; mutant shows virulence defect	0.158
orf19.2539	orf19.2539	Protein of unknown function; transcript detected on high-resolution tiling arrays	0.15775
orf19.254	orf19.254	Protein of unknown function; Hog1p-repressed; Spider biofilm induced	0.15725
orf19.2540	SAS3	Similar to silencing proteins; increased transcription is observed upon fluphenazine treatment; rat catheter biofilm repressed	0.15725
orf19.2541	orf19.2541	Ortholog(s) have 3'-5'-exodeoxyribonuclease activity, endonuclease activity, role in apoptotic DNA fragmentation, cellular response to oxidative stress and cytosol, nucleus localization	0.15725
orf19.2542	orf19.2542	Ortholog(s) have nucleus localization	0.15725
orf19.2544	orf19.2544	Ortholog(s) have aminoacyl-tRNA hydrolase activity, role in negative regulation of proteasomal ubiquitin-dependent protein catabolic process and mitochondrial outer membrane localization	0.157
orf19.2545	DOT6	Protein with a predicted role in telomeric gene silencing and filamentation; repressed by high-level peroxide stress; Spider biofilm induced	0.1565
orf19.2546	TRP2	Putative anthranilate synthase with a predicted role in tryptophan biosynthesis; regulated by Gcn2p and Gcn4p	0.15625
orf19.2547	orf19.2547	Has domain(s) with predicted RNA binding, ribonuclease activity	0.15575
orf19.2549	SHP1	Regulator of the type 1 protein phosphatase Glc7p activity, involved in control of morphogenesis, progression through the cell cycle and response to DNA damage	0.15525
orf19.255	ZCF1	Zn(II)2Cys6 transcription factor; transcript regulated during hypha formation; 5'-UTR intron; mutants show decreased colonization of mouse kidneys; flow model biofilm induced; Spider biofilm induced	0.15525
orf19.2551	MET6	Essential 5-methyltetrahydropteroyltriglutamate-homocysteine methyltransferase (cobalamin-independent methionine synthase); antigenic in murine/human systemic infection; heat shock, estrogen, GCN-induced; Spider biofilm repressed	0.155
orf19.2552	orf19.2552	Protein similar to S. cerevisiae Pmr1p; amphotericin B induced; previously merged with orf19.2553; unmerged from orf19.2553 in a revision of Assembly 21	0.155
orf19.2555	URA5	Putative orotate phosphoribosyltransferase; protein abundance is affected by URA3 expression in the CAI-4 strain background; flucytosine induced; protein level decreased in stationary phase cultures	0.155
orf19.2557	SEC65	Component of the protein-targeting Signal Recognition Particle (SRP); similar to mammalian Srp19; functional homolog of S. cerevisiae Sec65; Tbf1-induced	0.155
orf19.2558	orf19.2558	Has domain(s) with predicted zinc ion binding activity and nucleus localization	0.15475
orf19.2559	CDC4	F-box subunit of SCF(CDC4) ubiquitin ligase; functional homolog of S. cerevisiae Cdc4; mutation/depletion causes hyperfilamentation; Sol1 is a substrate of SCF-Cdc4; Spider biofilm induced	0.15475
orf19.2560	CDC60	Cytosolic leucyl tRNA synthetase; conserved amino acid and ATP binding class I signature, tRNA binding, proofreading motifs; likely essential for growth; interacts with benzoxaborole antifungals; present in exponential and stationary phase	0.1545
orf19.2563	orf19.2563	Ortholog(s) have U6 snRNA binding activity, role in spliceosomal complex assembly, spliceosomal tri-snRNP complex assembly and U6 snRNP localization	0.1545
orf19.2564	orf19.2564	Putative nucleolar protein; implicated in ribosome biogenesis; rat catheter biofilm repressed	0.1545
orf19.2565	orf19.2565	Predicted intermediate filament protein; required for nuclear and mitochondrial transmission to daughter buds in S. cerevisiae; Spider biofilm induced	0.15425
orf19.2568	IFU5	Predicted membrane protein; estradiol-induced; upregulation associated with CDR1 and CDR2 overexpression or fluphenazine; putative drug-responsive regulatory site; similar to S. cerevisiae Wwm1p; Hap43-repressed; Spider biofilm repressed	0.154
orf19.257	orf19.257	Transcription is negatively regulated by Sfu1p; repressed by nitric oxide	0.154
orf19.2570	MCI4	Putative NADH-ubiquinone dehydrogenase; Hap43p-repressed gene	0.154
orf19.2571	SEC4	Small GTPase of Rab family; role in post-Golgi secretion; possible C-terminal palmitoylation; downregulated on adherence to polystyrene; localizes to the Spitzenkorper during hyphal growth; functional homolog of S. cerevisiae Sec4p	0.15375
orf19.2573	FRS1	Phenylalanyl-tRNA synthetase; possible role in early cell wall biosynthesis; downregulated by phagocytosis by macrophages; possibly essential gene, disruptants not obtained by UAU1 method; protein present in exponential and stationary phase	0.15375
orf19.2574	orf19.2574	Ortholog(s) have Golgi apparatus localization	0.1535
orf19.2575	orf19.2575	Putative S-adenosylmethionine-dependent methyltransferase; Hap43p-induced gene	0.153
orf19.2579	orf19.2579	Msh4 ortholog of S. cerevisiae; involved in meiotic recombination and is required for normal levels of crossing over; Spider biofilm induced	0.153
orf19.258	orf19.258	Protein of unknown function; Spider biofilm induced	0.15275
orf19.2580	HST2	Putative histone deacetylase; role in regulation of white-opaque switch; Spider biofilm induced	0.15275
orf19.2581	orf19.2581	Protein with a predicted epimerase/dehydratase domain; Hap43-repressed gene	0.15175
orf19.2582	orf19.2582	Ortholog(s) have role in cytoplasmic translation, ribosome-associated ubiquitin-dependent protein catabolic process and RQC complex, cytosol, cytosolic large ribosomal subunit localization	0.1515
orf19.2583	PTR2	Oligopeptide transporter involved in uptake of di-/tripeptides; highly induced during chlamydospore formation in both C. albicans and C. dubliniensis	0.1515
orf19.2583.1	orf19.2583.1	Pseudogene; formerly an ORF Predicted by Annotation Working Group	0.1515
orf19.2583.2	orf19.2583.2	Pseudogene; formerly an ORF Predicted by Annotation Working Group	0.1515
orf19.2584	OPT9	Probable pseudogene similar to fragments of OPT1 oligopeptide transporter gene; decreased expression in hyphae compared to yeast-form cells; transcriptionally induced upon phagocytosis by macrophage	0.151
orf19.2585	orf19.2585	Ortholog of Candida albicans WO-1 : CAWG_01548	0.151
orf19.2587	HNM3	Putative transporter; Hap43, flucytosine repressed; possibly essential, disruptants not obtained by UAU1 method; Spider biofilm induced	0.15075
orf19.259	orf19.259	Protein with a predicted role in 60S ribosomal subunit assembly; flow model biofilm induced	0.1505
orf19.2590	orf19.2590	Putative dethiobiotin synthetase; transcript upregulated in clinical isolates from HIV+ patients with oral candidiasis; Hap43-repressed; GlcNAc-induced protein; Spider biofilm induced	0.15025
orf19.2591	orf19.2591	Ortholog(s) have adenosylmethionine-8-amino-7-oxononanoate transaminase activity and role in biotin biosynthetic process	0.15025
orf19.2593	BIO2	Putative biotin synthase; induced by high iron; repressed by ciclopirox olamine; upregulated in clinical isolates from HIV+ patients with oral candidiasis; Hap43-repressed; Spider biofilm induced	0.15025
orf19.2594	orf19.2594	Ortholog(s) have RNA polymerase I activity, role in transcription of nuclear large rRNA transcript from RNA polymerase I promoter and DNA-directed RNA polymerase I complex, cytosol localization	0.15
orf19.2597	MRS2	Putative magnesium ion transporter, mitochondrial; fungal-specific (no human or murine homolog)	0.15
orf19.2598	VMA4	H+ transporting ATPase E chain; transcript regulated by Mig1; caspofungin repressed; protein level decreases in stationary phase cultures; rat catheter biofilm repressed	0.14975
orf19.2599	CRC1	Mitochondrial carnitine carrier protein	0.14975
orf19.26	orf19.26	Putative peptide N-glycanase; induced by nitric oxide independent of Yhb1p	0.1495
orf19.260	SLD1	Sphingolipid delta-8 desaturase; catalyzes desaturation at C8 in the long-chain base moiety of ceramides in glucosylceramide synthesis, important for virulence; ketoconazole and hypoxia induced; Hap43-repressed; Spider biofilm induced	0.1495
orf19.2600	SPC98	Putative component of the microtubule-nucleating Tub4p (gamma-tubulin) complex; periodic mRNA expression, peak at cell-cycle S/G2 phase	0.1495
orf19.2601	HEM1	Putative 5-aminolevulinate synthase; caspofungin repressed; induced by high iron, nitric oxide; regulated by Ssn6; Hap43-repressed; Spider biofilm induced	0.1495
orf19.2602	OPT1	Oligopeptide transporter; transports 3-to-5-residue peptides; alleles are distinct, one has intron; suppresses S. cerevisiae ptr2-2 mutant defects; induced by BSA or peptides; Stp3p, Hog1p regulated; flow model biofilm induced	0.1495
orf19.2604	orf19.2604	S. pombe ortholog SPAC2C4.06c is a predicted tRNA (cytosine-5-)-methyltransferase; Spider biofilm induced	0.14925
orf19.2605	PRK1	Putative protein serine/threonine kinase; mutants sensitive to growth on hydrogen peroxide medium	0.14925
orf19.2606	HDA1	Histone deacetylase; inducer of filamentation; conserved deacetylation motif; regulates white-to-opaque switch frequency but not opaque-to-white switch; greater expression in white cells than opaque cells; inhibited by trichostatin-A;	0.149
orf19.2607	orf19.2607	Protein of unknown function; Spider biofilm induced	0.149
orf19.2608	ADH5	Putative alcohol dehydrogenase; regulated by white-opaque switch; fluconazole-induced; antigenic in murine infection; regulated by Nrg1, Tup1; Hap43, macrophage repressed, flow model biofilm induced; Spider biofilm induced	0.149
orf19.2609	CET1	mRNA 5'-triphosphatase; large subunit of mRNA capping enzyme; positively regulates Ceg1 activity; functional homolog of S. cerevisiae Cet1; Cet1 and Cgt1 form a 2:1 complex; flow model biofilm induced	0.149
orf19.261	orf19.261	Ortholog(s) have dolichol kinase activity, role in protein glycosylation and endoplasmic reticulum membrane localization	0.14875
orf19.2610	orf19.2610	Putative tRNA binding protein; intron-containing gene; Spider biofilm induced	0.14875
orf19.2611	MCM6	Putative MCM DNA replication initiation complex component; mRNA expression peak at cell-cycle M/G1 phase; regulated by tyrosol and cell density; repressed by alpha pheromone in SpiderM medium; Hap43-induced gene	0.1485
orf19.2612	orf19.2612	C2H2 zinc finger transcription factor; expression reduced in ssr1 null mutant; flow model biofilm induced	0.1485
orf19.2613	ECM4	Cytoplasmic glutathione S-transferase; regulated by Nrg1, Tup1; induced in core stress response, in cyr1 or ras1 mutant (yeast or hyphal cells); Tn mutation affects filamentous growth; stationary phase enriched; Spider biofilm induced	0.1485
orf19.2614	RSR1	RAS-related protein; GTP/GDP cycling required for wild-type polar bud site selection, hyphal growth guidance; role in systemic virulence in mouse; geranylgeranylation predicted; suppresses S. cerevisiae cdc24-4 mutant heat sensitivity	0.14825
orf19.2615	MDL1	Putative mitochondrial, half-size MDR-subfamily ABC transporter	0.14775
orf19.2616	UGT51C1	UDP-glucose:sterol glucosyltransferase; enzyme of sterol glucoside (membrane-bound lipid) biosynthesis; has UDP-sugar binding domain; activity is UDP-glucose-specific in vitro; enzyme does not use UDP-mannose; Mig1-regulated	0.14775
orf19.2618	MET2	Homoserine acetyltransferase; Hap43p-, Gcn4p-regulated; macrophage/pseudohyphal-repressed; not highly biofilm induced, in contrast to many sulfur amino acid metabolic genes; no human or murine homolog; virulence-group-correlated expression	0.14775
orf19.2619	PHO113	Putative constitutive acid phosphatase; Rim101-repressed; DTT-extractable; N-glycosylated; possibly an essential gene, disruptants not obtained by UAU1 method	0.14775
orf19.262	SMC3	Protein similar to S. cerevisiae Smc3p, which is an ATPase involved in sister chromatid cohesion; likely to be essential for growth, based on an insertional mutagenesis strategy	0.1475
orf19.2620	orf19.2620	Ortholog of C. dubliniensis CD36 : Cd36_33120 and Candida albicans WO-1 : CAWG_02046	0.1475
orf19.2621	orf19.2621	Ortholog(s) have role in mRNA splicing, via spliceosome and U1 snRNP, U2 snRNP, U2-type prespliceosome, U4/U6 x U5 tri-snRNP complex, U5 snRNP, cytosol localization	0.14725
orf19.2622	YPT31	Protein required for resistance to toxic ergosterol analog	0.14725
orf19.2623	ECM22	Zn(II)2Cys6 transcription factor; rat catheter and Spider biofilm induced	0.14725
orf19.2624	orf19.2624	Protein of unknown function; downregulated by fluphenazine treatment or in an azole-resistant strain that overexpresses CDR1 and CDR2	0.14725
orf19.2625	orf19.2625	Ortholog of Candida albicans WO-1 : CAWG_02051	0.147
orf19.2629	USO1	Ortholog(s) have role in ER to Golgi vesicle-mediated transport, Golgi vesicle docking, SNARE complex assembly and ER to Golgi transport vesicle membrane, Golgi membrane localization	0.147
orf19.263.1	orf19.263.1	Protein of unknown function; gene has intron; Spider biofilm induced	0.147
orf19.2630	RAD59	Protein involved in homologous recombination and DNA breaks repair; similar to S. cerevisiae Rad59p; N-terminal similarity with Rad52p	0.1465
orf19.2631	orf19.2631	Subunit of Elongator complex; required for modification of wobble nucleosides in tRNA in S. cerevisiae; Hap43-induced gene	0.1465
orf19.2633	HGT14	Putative MFS glucose transporter; 20 member C. albicans glucose transporter family; 12 probable membrane-spanning segments; expressed in rich medium with 2% glucose; rat catheter and flow model biofilm induced	0.1465
orf19.2637	orf19.2637	Ortholog(s) have Golgi apparatus, fungal-type vacuole membrane localization	0.14625
orf19.2638	orf19.2638	Protein of unknown function; Spider biofilm induced	0.14625
orf19.2639	orf19.2639	Ortholog(s) have structural constituent of ribosome activity and mitochondrial large ribosomal subunit localization	0.146
orf19.2639.1	orf19.2639.1	Lsm (Like Sm) protein; predicted role in involved in mRNA decay; Spider biofilm repressed	0.146
orf19.264	orf19.264	Has domain(s) with predicted protein kinase binding activity and role in regulation of cyclin-dependent protein serine/threonine kinase activity	0.146
orf19.2640	FUR1	Uracil phosphoribosyltransferase; predicted tetrameric enzyme of pyrimidine salvage; mutations associated with flucytosine resistance in clade I clinical isolates; flucytosine, macrophage-induced protein; levels decrease in stationary phase	0.145
orf19.2641	ARP1	Putative centractin; induced upon adherence to polystyrene	0.145
orf19.2642	orf19.2642	Ortholog(s) have myosin II binding activity, role in actomyosin contractile ring contraction and cellular bud neck contractile ring localization	0.1445
orf19.2643	RPO26	Putative RNA polymerase subunit; heterozygous null mutant exhibits resistance to parnafungin in the C. albicans fitness test	0.14425
orf19.2644	QCR2	Ubiquinol-cytochrome-c reductase; antigenic; induced by interaction with macrophage; repressed by nitric oxide; in detergent-resistant membrane fraction (possible lipid raft component); levels decrease in stationary phase; Hap43p-repressed	0.14425
orf19.2645	orf19.2645	Ortholog of Candida albicans WO-1 : CAWG_04710	0.144
orf19.2646	ZCF13	Predicted Zn(II)2Cys6 transcription factor; similar to but not the true ortholog of S. cerevisiae Hap1; mutants display decreased colonization of mouse kidneys	0.144
orf19.2647	ZCF14	Putative Zn(II)2Cys6 transcription factor; caspofungin induced	0.144
orf19.2649	PCL1	Cyclin homolog; transcript induced by filamentous growth; induced by alpha pheromone in SpiderM medium	0.14375
orf19.265	orf19.265	Protein with a ribonuclease III domain; flow model biofilm induced; Spider biofilm induced	0.14375
orf19.2650	orf19.2650	Protein of unknown function; rat catheter biofilm induced	0.14375
orf19.2650.1	orf19.2650.1	Mitochondrial ribosomal protein of the small subunit; Spider biofilm repressed	0.1435
orf19.2651	CAM1-1	Putative translation elongation factor; downregulated upon phagocytosis by murine macrophages; Hap43-induced gene; Spider biofilm repressed	0.1435
orf19.2652	TEF4	Putative translation elongation factor; genes encoding ribosomal subunits, translation factors, and tRNA synthetases are downregulated upon phagocytosis by murine macrophage	0.14325
orf19.2653	orf19.2653	Protein with a transient receptor potential (TRP) ion channel domain; mutants are viable; rat catheter and Spider biofilm induced; flow model biofilm repressed	0.14325
orf19.2654	RMS1	Putative lysine methyltransferase; Hap43-induced; protein induced during mating; possibly essential, disruptants not obtained by UAU1 method; rat catheter and Spider biofilm induced	0.14325
orf19.2655	BUB3	Protein similar to S. cerevisiae Bub3; a kinetochore checkpoint component; induced by hydroxyurea treatment; flow model biofilm induced; Spider biofilm induced	0.14325
orf19.2657	orf19.2657	Protein of unknown function	0.14325
orf19.2660	EAF3	Subunit of the NuA4 histone acetyltransferase complex; rat catheter and Spider biofilm induced	0.143
orf19.2661	TLO34	Non-telomeric member of a family of telomere-proximal genes of unknown function; predicted N-terminus is extended, relative to that of other family members; overlaps orf19.2662	0.14275
orf19.2662	orf19.2662	Predicted ORF of unknown function; overlaps TLO34/orf19.2661	0.14275
orf19.2663	orf19.2663	Ortholog of Pichia stipitis Pignal : PICST_29216 and Candida albicans WO-1 : CAWG_00788	0.14275
orf19.2664	orf19.2664	Ortholog(s) have role in cellular response to DNA damage stimulus, interspecies interaction between organisms and cytosol, nucleus, polysome localization	0.1425
orf19.2665	MSN5	Predicted karyopherin involved in nuclear import and export of proteins; flow model biofilm induced; Spider biofilm induced	0.14225
orf19.2667	RPF1	Putative nucleolar protein with a predicted role in the assembly and export of the large ribosomal subunit; essential for growth; rat catheter and Spider biofilm induced	0.14225
orf19.2668	RHD2	Predicted ORF in retrotransposon Tca4 with similarity to the Gag region encoding nucleocapsid-like protein; overlaps blocked reading frame orf19.2668.1; yeast-enriched transcript; rat catheter biofilm induced	0.142
orf19.2669	orf19.2669	ORF in retrotransposon Tca4; similar to Pol region of retrotransposons encoding reverse transcriptase, protease, integrase; downstream of RHD2, similar to the Gag region encoding nucleocapsid-like protein; rat catheter biofilm induced	0.142
orf19.267	orf19.267	Protein required for normal filamentous growth; mRNA binds She3	0.142
orf19.2670	orf19.2670	Ortholog(s) have 3-hydroxyacyl-[acyl-carrier-protein] dehydratase activity, role in fatty acid biosynthetic process and mitochondrion localization	0.142
orf19.2671	orf19.2671	Protein with a predicted FAD-dependent pyridine nucleotide reductase domains; putative oxidoreductase; Plc1-regulated; possibly an essential gene, disruptants not obtained by UAU1 method	0.14175
orf19.2672	NCP1	NADPH-cytochrome P450 reductase, acts with Erg11p in sterol 14 alpha-demethylation in ergosterol biosynthesis; subject to hypoxic regulation; ketoconazole-induced; caspofungin repressed	0.1415
orf19.2673	orf19.2673	Ortholog(s) have role in DNA repair and Smc5-Smc6 complex, cytoplasm, nucleus localization	0.1415
orf19.2674	orf19.2674	Putative transcription factor with zinc finger DNA-binding motif; Hap43p-repressed gene	0.1415
orf19.2675	orf19.2675	Ortholog(s) have mRNA binding activity, role in spliceosomal complex assembly and U2 snRNP, U2-type prespliceosome localization	0.14125
orf19.2676	orf19.2676	Predicted hexameric RecA-like ATPase Elp456 Elongator subcomplex subunit; required for modification of wobble nucleosides in tRNA; Spider biofilm induced	0.1405
orf19.2677	orf19.2677	Putative GPI transamidase component; possibly an essential gene, disruptants not obtained by UAU1 method	0.1405
orf19.2678	BUB1	Putative cell cycle checkpoint kinase; mutation confers increased sensitivity to nocodazole	0.1405
orf19.268	orf19.268	Ortholog(s) have role in transcription-coupled nucleotide-excision repair and Ddb1-Ckn1 complex, cytosol localization	0.14025
orf19.2680	orf19.2680	Ortholog(s) have phospholipid-translocating ATPase activity, role in intracellular protein transport, phospholipid translocation and trans-Golgi network transport vesicle localization	0.14
orf19.2681	RBT7	Protein with similarity to RNase T2 enzymes; has putative secretion signal; expression is Tup1-repressed	0.14
orf19.2682	orf19.2682	Ortholog(s) have TBP-class protein binding, TBP-class protein binding RNA polymerase II transcription factor activity involved in preinitiation complex assembly activity	0.14
orf19.2684	orf19.2684	Protein of unknown function; flow model biofilm repressed	0.13975
orf19.2685	PGA54	GPI-anchored protein; Hog1-repressed; induced in cyr1 or efg1 mutant or in hyphae; colony morphology-related gene regulation by Ssn6; induced in RHE model; mRNA binds She3; regulated in Spider biofilms by Tec1, Egf1, Ntd80, Rob1, Brg1	0.13975
orf19.2686	orf19.2686	Ortholog(s) have carboxypeptidase activity, role in nitrogen compound metabolic process, proteolysis involved in cellular protein catabolic process and fungal-type vacuole lumen localization	0.1395
orf19.2687.1	orf19.2687.1	Ortholog(s) have RNA polymerase I activity, RNA polymerase II activity, RNA polymerase III activity, RNA-directed RNA polymerase activity, zinc ion binding activity	0.1395
orf19.2688	NAN1	Putative U3 snoRNP protein; Hap43p-induced gene; physically interacts with TAP-tagged Nop1p	0.1395
orf19.269	SES1	Seryl-tRNA synthetase; charges the tRNA that recognizes the CUG codon, which typically specifies Leu, but specifies Ser in C. albicans; complements S. cerevisiae ses1 mutant viability; soluble protein in hyphae; macrophage-regulated	0.1395
orf19.2690	orf19.2690	Putative mitochondrial GTPase; required for mitochondrial morphology and genome maintenance; Spider biofilm induced	0.1395
orf19.2691	orf19.2691	Planktonic growth-induced gene	0.13925
orf19.2693	GST2	Glutathione S transferase; induced by benomyl and in populations of cells exposed to fluconazole over multiple generations; regulated by Nrg1, Tup1; induced by nitric oxide; stationary phase enriched; Spider biofilm induced	0.13925
orf19.2694	TYS1	Putative tRNA-Tyr synthetase; downregulated upon phagocytosis by murine macrophages; stationary phase enriched protein; Spider biofilm repressed	0.13925
orf19.2695	UBR1	Protein similar to S. cerevisiae Ubr1p ubiquitin-protein ligase; transposon mutation affects filamentous growth; Spider biofilm induced	0.139
orf19.2697	orf19.2697	Ortholog(s) have role in protein monoubiquitination, regulation of dipeptide transmembrane transport by regulation of transcription from RNA polymerase II promoter and cytoplasm, nucleus localization	0.13875
orf19.2698	orf19.2698	Ortholog(s) have role in protein folding in endoplasmic reticulum and ER membrane protein complex localization	0.13875
orf19.2699	ABP1	Ortholog of S. cerevisiae Abp1; actin-binding protein of the cortical actin cytoskeleton; caspofungin induced; protein only detected in stationary phase yeast-form cultures; Spider biofilm repressed	0.13875
orf19.27	orf19.27	Ortholog of C. dubliniensis CD36 : Cd36_20860, C. parapsilosis CDC317 : CPAR2_104250, Candida tenuis NRRL Y-1498 : CANTEDRAFT_115100 and Debaryomyces hansenii CBS767 : DEHA2E10450g	0.13875
orf19.270	orf19.270	Ortholog of C. parapsilosis CDC317 : CPAR2_102150, C. dubliniensis CD36 : Cd36_82780, Pichia stipitis Pignal : psti_CGOB_00155 and Candida orthopsilosis Co 90-125 : CORT_0B03450	0.13825
orf19.2701	orf19.2701	Protein of unknown function; Ras1 and Cyr1 repressed; rat catheter and Spider biofilm induced	0.13825
orf19.2703	orf19.2703	Specificity factor required for ubiquitination and sorting of specific cargo proteins at the multivesicular body; ortholog of S. cerevisiae Ear1; transcript regulated by iron; Ssr1-represssed; Spider biofilm induced	0.138
orf19.2704	orf19.2704	Ortholog of Candida albicans WO-1 : CAWG_03507	0.13775
orf19.2706	CRH11	GPI-anchored cell wall transglycosylase, putative ortholog of S. cerevisiae Crh1p; predicted glycosyl hydrolase domain; similar to Csf4p and to antigenic A. fumigatus Aspf9; predicted Kex2p substrate; caspofungin-induced	0.13775
orf19.2707.1	QCR9	Putative ubiquinol cytochrome c reductase; shows colony morphology-related gene regulation by Ssn6p	0.13775
orf19.2708	orf19.2708	Ortholog(s) have guanyl-nucleotide exchange factor activity, role in mature ribosome assembly and cytosol, nucleolus, polysome, preribosome, large subunit precursor localization	0.13775
orf19.2709	ZUO1	Ortholog of S. cerevisiae Zuo1; a cytosolic ribosome-associated chaperone; likely to be essential for growth, based on an insertional mutagenesis strategy; Spider biofilm repressed	0.13775
orf19.271	ADH4	Predicted 3-hydroxyacyl-CoA dehydrogenase; transcript is increased in azole-resistant strain overexpressing MDR1; transcript is increased in populations of cells exposed to fluconazole over multiple generations; mutant is viable	0.1375
orf19.2710	orf19.2710	Ortholog(s) have enzyme activator activity, role in chromosome segregation and cytoplasm, nucleus localization	0.1375
orf19.2711	orf19.2711	Similar to S. cerevisiae Elp2, an Elongator complex subunit required for modification of wobble nucleosides in tRNA; repressed in core stress response	0.1375
orf19.2711.1	MED20	Subunit of the RNA polymerase II mediator complex; involved in control of filamentous growth and Spider biofilm formation; rat catheter biofilm repressed	0.1375
orf19.2712	HCA4	Putative role in regulation of cell wall biogenesis; Hap43p-induced gene; possibly an essential gene, disruptants not obtained by UAU1 method; flow model and rat catheter biofilm induced	0.13725
orf19.2713	orf19.2713	Ortholog(s) have role in reciprocal meiotic recombination and nucleus localization	0.13725
orf19.2715	RPC53	Ortholog(s) have RNA polymerase III activity, role in tRNA transcription from RNA polymerase III promoter and DNA-directed RNA polymerase III complex localization	0.137
orf19.2717	SAS10	Putative U3-containing small subunit processome complex subunit; Hap43p-induced gene; mutation confers resistance to 5-fluorocytosine (5-FC); repressed upon high-level peroxide stress	0.13675
orf19.272	FAA21	Predicted acyl CoA synthetase; upregulated upon phagocytosis; transcript regulated by Nrg1 and Mig1	0.13675
orf19.2720	orf19.2720	Cytosolic chaperonin Cct ring complex subunit; role in the assembly of actin and tubulins; Spider biofilm repressed	0.13675
orf19.2721	orf19.2721	Ortholog(s) have role in ascospore formation, regulation of mitotic cell cycle, regulation of translation and cytosol, nucleus localization	0.1365
orf19.2722	CGR1	Negative regulator of yeast-form growth; HSP70 family member; induced by growth cessation at yeast-hyphal transition or in planktonic growth; physically interacts with Msi3p; similar to rat anti-aging gene, SMP30, stationary phase enriched	0.1365
orf19.2723	HIT1	Ortholog of S. cerevisiae Hit1; protein of unknown function required for high temperature growth; flow model biofilm induced; Spider biofilm induced	0.13625
orf19.2724	orf19.2724	Protein of unknown function; flow model, rat catheter and Spider biofilm induced; Hap43-repressed	0.13575
orf19.2725	orf19.2725	Ortholog of Candida albicans WO-1 : CAWG_03525	0.13575
orf19.2726	orf19.2726	Putative plasma membrane protein; Plc1-regulated; Spider biofilm induced	0.13575
orf19.2727	GRX3	Putative glutaredoxin; flucytosine induced; regulated by Gcn4p; repressed in response to amino acid starvation (3-aminotriazole treatment)	0.1355
orf19.2728	orf19.2728	Ortholog(s) have DNA clamp loader activity, role in DNA damage checkpoint, nucleotide-excision repair, reciprocal meiotic recombination and Rad17 RFC-like complex, nucleus localization	0.13525
orf19.273	orf19.273	Ortholog(s) have unfolded protein binding activity, role in sterol biosynthetic process and endoplasmic reticulum localization	0.135
orf19.2730	orf19.2730	Has domain(s) with predicted zinc ion binding activity	0.1345
orf19.2731	orf19.2731	Ortholog of Debaryomyces hansenii CBS767 : DEHA2E16016g, Pichia stipitis Pignal : PICST_38487, Spathaspora passalidarum NRRL Y-27907 : SPAPADRAFT_58603 and Candida tropicalis MYA-3404 : CTRG_00248	0.1345
orf19.2733	orf19.2733	Putative subunit of phosphatidylinositol 3-kinase complexes I and II; transcription is activated in the presence of elevated CO2	0.1345
orf19.2734	orf19.2734	Protein with a glucose/ribitol dehydrogenase family domain; mutants are viable	0.1345
orf19.2735	SEN2	Putative tRNA splicing endonuclease subunit; mutation confers hypersensitivity to toxic ergosterol analog and to amphotericin B; 5'-UTR intron; Hap43-induced; Spider biofilm induced	0.1345
orf19.2736	HFL2	HAP5-like; ortholog of S. cerevisiae Bur6, a heterodimeric NC2 transcription regulator complex subunit; flucytosine induced	0.13425
orf19.2737	orf19.2737	Carbohydrate kinase domain-containing protein; Spider biofilm induced	0.13425
orf19.2738	SUL2	Putative sulfate transporter; transcript negatively regulated by Sfu1; amphotericin B induced; F-12/CO2 and Spider biofilm induced	0.134
orf19.2739	orf19.2739	Ortholog(s) have histone binding activity, role in DNA replication-dependent nucleosome assembly and CAF-1 complex, chromosome, centromeric region, nucleus localization	0.134
orf19.274	TFC4	Putative RNA polymerase III transcription initiation factor complex (TFIIIC) subunit; induced by Mnl1 under weak acid stress; possibly essential gene, disruptants not obtained by UAU1 method	0.134
orf19.2740	orf19.2740	Ortholog(s) have 5'-flap endonuclease activity	0.13375
orf19.2742	orf19.2742	Ortholog of C. parapsilosis CDC317 : CPAR2_400095, C. dubliniensis CD36 : Cd36_42560, Candida tenuis NRRL Y-1498 : CANTEDRAFT_113280 and Lodderomyces elongisporus NRLL YB-4239 : LELG_04166	0.1335
orf19.2743	orf19.2743	Ortholog(s) have RNA polymerase II core promoter proximal region sequence-specific DNA binding transcription factor activity involved in negative regulation of transcription, more	0.1335
orf19.2745	UME7	Putative transcription factor with zinc cluster DNA-binding motif; similar to S. cerevisiae Ume6p, which is a transcription factor involved in the regulation of meiotic genes	0.13325
orf19.2746	EMP70	Protein with a role in endosome-to-vacuole sorting; rat catheter biofilm repressed	0.13325
orf19.2747	RGT1	Zn(II)2Cys6 transcription factor; transcriptional repressor involved in the regulation of glucose transporter genes; ortholog of S. cerevisiae Rgt1; mutants display decreased colonization of mouse kidneys	0.13325
orf19.2748	ARG83	GAL4-like Zn(II)2Cys6 transcription factor; clade-associated expression; null shows abnormal regulation of invasive colony growth, is unable to utilize proline as a nitrogen source; flow model biofilm induced	0.133
orf19.2749	orf19.2749	BTB/POZ domain protein; induced by Mnl1 under weak acid stress; flow model biofilm induced; Spider biofilm induced	0.133
orf19.275	orf19.275	Ortholog(s) have RNA binding, ribonuclease MRP activity, ribonuclease P activity, role in intronic box C/D snoRNA processing, mRNA cleavage and endoplasmic reticulum, nucleolar ribonuclease P complex, ribonuclease MRP complex localization	0.133
orf19.2751	orf19.2751	Predicted membrane transporter; member of the monocarboxylate porter (MCP) family, major facilitator superfamily; Hap43-induced gene; alkaline upregulated by Rim101; possibly an essential gene, disruptants not obtained by UAU1 method	0.133
orf19.2752	ADR1	C2H2 transcription factor; ortholog of S. cerevisiae Adr1 but mutant phenotype suggests a different set of target genes; transposon mutation affects filamentous growth; Spider biofilm induced	0.133
orf19.2753	ZCF15	Predicted Zn(II)2Cys6 transcription factor of unknown function; rat catheter biofilm induced	0.133
orf19.2754	TIM13	Predicted mitochondrial intermembrane space protein with a role in protein import into mitochondria	0.13275
orf19.2755	orf19.2755	Ortholog(s) have role in proteasomal ubiquitin-independent protein catabolic process, proteasome-mediated ubiquitin-dependent protein catabolic process and cytosol, nucleus, proteasome core complex, beta-subunit complex localization	0.1325
orf19.2756	orf19.2756	Ortholog(s) have HDEL sequence binding activity, role in ER to Golgi vesicle-mediated transport, protein retention in ER lumen and Golgi apparatus, integral to endoplasmic reticulum membrane localization	0.13225
orf19.2757	orf19.2757	Has domain(s) with predicted role in cell redox homeostasis	0.13225
orf19.2758	PGA38	Putative adhesin-like GPI-anchored protein; repressed during cell wall regeneration; possibly an essential gene, disruptants not obtained by UAU1 method; rat catheter and Spider biofilm repressed	0.132
orf19.276	orf19.276	Plasma membrane-associated protein; upregulated in an azole-resistant strain that overexpresses MDR1; Hap43-repressed; Spider biofilm induced	0.13175
orf19.2760	orf19.2760	Putative mRNA cleavage and polyadenylation factor; heterozygous null mutant exhibits hypersensitivity to parnafungin and cordycepin in the C. albicans fitness test	0.13175
orf19.2761	orf19.2761	Putative glycosylphosphatidylinositol (GPI) anchor assembly protein; transposon insertion causes decreased colony wrinkling but does not block true hyphal growth; induced by nitric oxide independent of Yhb1p	0.13125
orf19.2762	AHP1	Alkyl hydroperoxide reductase; immunogenic; fluconazole-induced; amphotericin B, caspofungin, alkaline repressed; core stress response induced; Ssk1/Nrg1/Tup1/Ssn6/Hog1 regulated; flow model biofilm induced; rat catheter biofilm repressed	0.131
orf19.2763	orf19.2763	Protein not essential for viability; orf19.10279 possibly transcriptionally regulated upon hyphal formation	0.131
orf19.2765	PGA62	Adhesin-like cell wall protein; putative GPI-anchor; fluconazole-induced; induced in high iron; induced during cell wall regeneration; Cyr1 or Ras1 repressed; Tbf1 induced	0.13075
orf19.2766	orf19.2766	Dubious open reading frame	0.13075
orf19.2767	PGA59	Adhesin-like cell wall protein; putative GPI-anchor; colony morphology-related gene regulation by Ssn6; Hap43-induced; Spider biofilm repressed	0.1305
orf19.2768	AMS1	Putative alpha-mannosidase; transcript regulated by Nrg1; induced during cell wall regeneration; flow model biofilm induced; Spider biofilm induced	0.1305
orf19.2769	orf19.2769	Putative protease B inhibitor; hyphal-induced expression; Cyr1p- and Ras1p-repressed	0.1305
orf19.277	THI6	Putative thiamin-phosphate pyrophosphorylase, hydroxyethylthiazole kinase; fungal-specific; Spider biofilm induced	0.1305
orf19.2770	orf19.2770	Ortholog of C. dubliniensis CD36 : Cd36_42220, C. parapsilosis CDC317 : CPAR2_500340, Debaryomyces hansenii CBS767 : DEHA2G17754g and Pichia stipitis Pignal : PICST_31424	0.1305
orf19.2770.1	SOD1	Cytosolic copper- and zinc-containing superoxide dismutase; role in protection from oxidative stress; required for full virulence; alkaline induced by Rim101; induced by human blood; rat catheter, flow model and Spider biofilm repressed	0.1305
orf19.2771	BEM3	Putative GTPase-activating protein (GAP) for Rho-type GTPase Cdc42p; involved in cell signaling pathways that control cell polarity; similar to S. cerevisiae Bem3p	0.1305
orf19.2772	HOS3	Histone deacetylase; similar to S. cerevisiae Hos3p; greater expression and longer mRNA in white cells, compared to opaque cells; has conserved deacetylation motif	0.13025
orf19.2774	LAB5	Ortholog(s) have role in protein lipoylation and mitochondrion localization	0.13025
orf19.2775	IDI1	Ortholog(s) have isopentenyl-diphosphate delta-isomerase activity, role in farnesyl diphosphate biosynthetic process and cytosol, nucleus localization	0.13
orf19.2778	orf19.2778	Protein of unknown function; transcript is upregulated in clinical isolates from HIV+ patients with oral candidiasis	0.13
orf19.2779	orf19.2779	Protein of unknown function; Hap43-repressed gene	0.13
orf19.278	orf19.278	Protein of unknown function; required for adhesion to abiotic substrate; Spider biofilm induced	0.12975
orf19.2781	orf19.2781	Protein with predicted serine/threonine kinase and tyrosine kinase domains; possibly an essential gene, disruptants not obtained by UAU1 method; Spider biofilm induced	0.1295
orf19.2782	orf19.2782	Ortholog(s) have disulfide oxidoreductase activity, role in cellular response to oxidative stress, response to osmotic stress and mitochondrial matrix localization	0.12925
orf19.2783	PIR32	Cell wall protein, putative structural component of the cell wall; mutation leads to increased chitin content, increased virulence and resistance to stresses; macrophage-induced gene	0.12925
orf19.2784	orf19.2784	Ortholog of C. dubliniensis CD36 : Cd36_07090, Candida tenuis NRRL Y-1498 : cten_CGOB_00237, Debaryomyces hansenii CBS767 : DEHA2F25542g and Pichia stipitis Pignal : psti_CGOB_00186	0.129
orf19.2785	ATP7	Putative subunit of the F1F0-ATPase complex; colony morphology-related gene regulation by Ssn6; farnesol, macrophage-downregulated protein abundance; protein present in exponential and stationary yeast growth phases; Hap43-induced	0.129
orf19.2786	orf19.2786	Ortholog(s) have AP-2 adaptor complex, cellular bud neck localization	0.12875
orf19.2787	PRY1	Pry family pathogenesis-related protein; extracellular; opaque specific transcript; repressed by alpha pheromone in SpiderM medium; possibly essential, disruptants not obtained by UAU1 method; Spider biofilm induced	0.12875
orf19.2788	orf19.2788	Has domain(s) with predicted RNA binding, pseudouridine synthase activity and role in pseudouridine synthesis	0.12875
orf19.2789	orf19.2789	Ortholog of C. dubliniensis CD36 : Cd36_07040, C. parapsilosis CDC317 : CPAR2_208700, Candida tenuis NRRL Y-1498 : CANTEDRAFT_108836 and Debaryomyces hansenii CBS767 : DEHA2F25674g	0.1285
orf19.279	orf19.279	Protein with a predicted D-Tyr-tRNA(Tyr) deacylase domain; Hap43-repressed gene	0.12825
orf19.2790	SWD2	Ortholog(s) have histone methyltransferase activity (H3-K4 specific) activity	0.12825
orf19.2791	BBC1	Putative SH3-domain-containing protein	0.12825
orf19.2792	IST2	Ortholog(s) have lipid binding activity, role in endoplasmic reticulum membrane organization, regulation of phosphatidylinositol dephosphorylation and cellular bud membrane, cortical endoplasmic reticulum localization	0.12825
orf19.2794	orf19.2794	Putative non-specific single-domain racemase; regulated by Gcn4p; repressed in response to amino acid starvation (3-AT treatment); alkaline upregulated; macrophage-induced protein	0.12775
orf19.2795	LHP1	Ortholog(s) have tRNA binding activity, role in regulation of ascospore formation, tRNA 3'-trailer cleavage, endonucleolytic and nucleolus, nucleoplasm localization	0.12775
orf19.2796	orf19.2796	Ortholog(s) have DNA-directed DNA polymerase activity, role in DNA replication initiation, telomere capping and alpha DNA polymerase:primase complex, cytosol, nuclear envelope localization	0.1275
orf19.2797	orf19.2797	Has domain(s) with predicted ATP binding, DNA binding, helicase activity	0.12725
orf19.2798	orf19.2798	Putative helicase; fungal-specific (no human or murine homolog)	0.127
orf19.2799	GPI8	Protein similar to S. cerevisiae Gpi8p, which is a subunit of the GPI transamidase complex that adds GPI anchors to proteins; likely to be essential for growth, based on an insertional mutagenesis strategy	0.127
orf19.28	orf19.28	Putative thiamine transmembrane transporter; Spider biofilm induced	0.127
orf19.280	orf19.280	Ortholog of C. dubliniensis CD36 : Cd36_82875 and Candida albicans WO-1 : CAWG_02609	0.127
orf19.2800	orf19.2800	Ortholog of Candida albicans WO-1 : CAWG_00667	0.12675
orf19.2803	HEM13	Coproporphyrinogen III oxidase; antigenic; on yeast cell surface, not hyphae; iron-regulated expression; Hap43, macrophage-repressed; farnesol-induced; possibly essential; flow model biofilm induced; rat catheter, Spider biofilm repressed	0.12675
orf19.2804	orf19.2804	Ortholog of C. dubliniensis CD36 : Cd36_83980, C. parapsilosis CDC317 : CPAR2_102620, Candida tenuis NRRL Y-1498 : CANTEDRAFT_134550 and Debaryomyces hansenii CBS767 : DEHA2D12100g	0.1265
orf19.2805	PEX8	Putative peroxisomal biogenesis factor; expression regulated during planktonic growth	0.1265
orf19.2808	ZCF16	Predicted Zn(II)2Cys6 transcription factor; mutants are viable; rat catheter biofilm induced	0.126
orf19.2809	CTN3	Peroxisomal carnitine acetyl transferase; no obvious metabolic, hyphal, virulence defects in Ura+ strain; induced by macrophage engulfment, hyphal growth, starvation, nonfermentable carbon sources; rat catheter, Spider biofilm induced	0.126
orf19.281	orf19.281	Ortholog of C. dubliniensis CD36 : Cd36_82880, C. parapsilosis CDC317 : CPAR2_102370, Candida tenuis NRRL Y-1498 : CANTEDRAFT_118463 and Pichia stipitis Pignal : PICST_32241	0.126
orf19.2810	AAP1	Putative amino acid permease; fungal-specific; possibly essential, disruptants not obtained by UAU1 method; Spider biofilm induced	0.126
orf19.2812	orf19.2812	Protein of unknown function; Spider biofilm induced	0.12575
orf19.2813	orf19.2813	Ortholog of Candida albicans WO-1 : CAWG_02711	0.1255
orf19.2818	orf19.2818	Ortholog(s) have RNA-dependent ATPase activity, second spliceosomal transesterification activity, role in generation of catalytic spliceosome for second transesterification step and U2-type catalytic step 2 spliceosome localization	0.125
orf19.2819	orf19.2819	Ortholog of C. dubliniensis CD36 : Cd36_27570, C. parapsilosis CDC317 : CPAR2_801010, Candida tenuis NRRL Y-1498 : cten_CGOB_00198 and Debaryomyces hansenii CBS767 : DEHA2E09306g	0.12475
orf19.2820	orf19.2820	Ortholog(s) have nucleocytoplasmic transporter activity, structural constituent of nuclear pore activity	0.12475
orf19.2821	orf19.2821	Protein of unknown function; Hap43-repressed gene; repressed by nitric oxide	0.1245
orf19.2822	orf19.2822	Essential component of the conserved oligomeric Golgi complex; role in fusion of transport vesicles to Golgi compartments; rat catheter biofilm repressed	0.1245
orf19.2823	RFG1	HMG domain transcriptional repressor of filamentous growth and hyphal genes; in Tup1-dependent and -independent pathways; binds DNA; transcript not regulated by oxygen or serum; not responsible for hypoxic repression; Spider biofilm induced	0.12425
orf19.2825	DRE2	Putative cytosolic Fe-S protein assembly protein; a-specific transcript; regulated by Sef1, Sfu1, and Hap43; rat catheter and Spider biofilm induced	0.124
orf19.2826	orf19.2826	Ortholog of C. dubliniensis CD36 : Cd36_27680, C. parapsilosis CDC317 : CPAR2_801140, Candida tenuis NRRL Y-1498 : CANTEDRAFT_129982 and Debaryomyces hansenii CBS767 : DEHA2E09526g	0.124
orf19.2827	orf19.2827	Ortholog(s) have structural constituent of cytoskeleton activity	0.12375
orf19.2828	orf19.2828	Ortholog(s) have alpha-tubulin binding, microtubule binding activity, role in establishment or maintenance of cell polarity, post-chaperonin tubulin folding pathway and cytosol, nucleus localization	0.12375
orf19.2829	orf19.2829	Ortholog(s) have role in protein transport and endoplasmic reticulum, nuclear envelope localization	0.1235
orf19.2830	RRP9	Ribosomal protein; mutation confers resistance to 5-fluorocytosine (5-FC), 5-fluorouracil (5-FU), and tubercidin (7-deazaadenosine); physically interacts with TAP-tagged Nop1; Hap43-induced; Spider biofilm induced	0.1235
orf19.2831	RPC31	Putative RNA polymerase III subunit C31; repressed by nitric oxide; induced during infection of murine kidney, compared to growth in vitro; has murine homolog	0.1235
orf19.2832	INN1	Protein with similarity to S. cerevisiae Inn1p, which is an essential protein of the contractile actomyosin ring required for ingression of the plasma membrane into the bud neck during cytokinesis; contains a C2 membrane targeting domain	0.12325
orf19.2833	PGA34	Putative GPI-anchored protein; transcript repressed by alpha pheromone in SpiderM medium; induced in oralpharyngeal candidasis; flow model biofilm induced; Spider biofilm induced	0.12325
orf19.2834	RPD3	Histone deacetylase; regulates frequency of white-to-opaque and opaque-to-white switching; greater expression in white cells than opaque cells; has conserved deacetylation motif	0.123
orf19.2835	orf19.2835	Ortholog(s) have SUMO activating enzyme activity, role in cellular response to DNA damage stimulus, protein sumoylation, regulation of mitotic cell cycle and SUMO activating enzyme complex, cytosol localization	0.12275
orf19.2836	orf19.2836	Protein with similarity to carbonic anhydrases	0.12275
orf19.2837	ALG5	Putative glucosyltransferase involved in cell wall mannan biosynthesis; possibly an essential gene, disruptants not obtained by UAU1 method	0.12275
orf19.2838	orf19.2838	Protein of unknown function; mutation confers hypersensitivity to amphotericin B; flow model biofilm induced	0.1225
orf19.2839	CIRT4B	Cirt family transposase; transcript repressed in an azole-resistant strain that overexpresses CDR1 and CDR2; Hap43-repressed; flow model biofilm induced	0.1225
orf19.284	orf19.284	Ortholog of C. dubliniensis CD36 : Cd36_82890, Debaryomyces hansenii CBS767 : DEHA2G01034g, Pichia stipitis Pignal : PICST_32242 and Candida guilliermondii ATCC 6260 : PGUG_04638	0.12225
orf19.2841	PGM2	Ortholog of S. cerevisiae Pgm2; induced in planktonic culture; Tye7p-regulated; flow model biofilm induced; rat catheter biofilm repressed	0.12225
orf19.2842	GZF3	GATA-type transcription factor; oxidative stress-induced via Cap1; mutant has abnormal colony morphology and altered sensitivity to fluconazole, LiCl, and copper; Spider biofilm induced	0.12225
orf19.2843	RHO1	Small GTPase of Rho family; regulates beta-1,3-glucan synthesis activity and binds Gsc1p; essential; expected to be geranylgeranylated by geranylgeranyltransferase type I; plasma membrane-localized	0.12225
orf19.2844	APL4	Predicted gamma-adaptin, large subunit of the clathrin-associated protein (AP-1) complex; that binds clathrin and is involved in vesicle mediated transport; induced in core caspofungin response; rat catheter biofilm repressed	0.122
orf19.2846	orf19.2846	Protein of unknown function; Hap43-repressed; induced in core caspofungin response; regulated by yeast-hypha switch; Spider biofilm repressed	0.12175
orf19.2847	orf19.2847	Ortholog(s) have RNA polymerase III activity, role in tRNA transcription from RNA polymerase III promoter and DNA-directed RNA polymerase III complex, mitotic spindle pole body localization	0.1215
orf19.2848	orf19.2848	Predicted regulatory subunit of the Atg1 signaling complex; required for vesicle formation during autophagy and the cytoplasm-to-vacuole targeting (Cvt) pathway; Spider biofilm induced	0.1215
orf19.2849	AQY1	Aquaporin water channel; osmotic shock resistance, WT freeze tolerance; virulent in mice; flucytosine repressed; flow model/RPMI/Spider/rat catheter biofilm induced; required for RPMI biofilm formation; Bcr1-induced in a/a RPMI biofilms	0.121
orf19.285	orf19.285	Ortholog of S. cerevisiae Igo2; role in mRNA stabilization of mRNA; Spider biofilm induced	0.12075
orf19.2850	orf19.2850	Protein of unknown function; induced by nitric oxide independent of Yhb1p	0.12075
orf19.2851	orf19.2851	Putative ornithine transport protein; localized to the mitochondrial membrane	0.1205
orf19.2852	orf19.2852	Ortholog(s) have structural constituent of ribosome activity, role in mitochondrial translational initiation and mitochondrial small ribosomal subunit localization	0.1205
orf19.2853	orf19.2853	Protein of unknown function; rat catheter biofilm induced	0.11975
orf19.2857	orf19.2857	Ortholog(s) have ATP-dependent DNA helicase activity	0.1195
orf19.2859	SRP40	Putative chaperone of small nucleolar ribonucleoprotein particles; macrophage/pseudohyphal-induced; rat catheter biofilm induced	0.1195
orf19.286	orf19.286	Has a predicted autophagy-related protein domain; transcription repressed by fluphenazine treatment	0.1195
orf19.2862	RIB1	Putative GTP cyclohydrolase II; enzyme of riboflavin biosynthesis; fungal-specific (no human or murine homolog); regulated by Sef1p-, Sfu1p-, and Hap43p	0.1195
orf19.2863	orf19.2863	Ortholog of C. dubliniensis CD36 : Cd36_28090, C. parapsilosis CDC317 : CPAR2_802560, Candida tenuis NRRL Y-1498 : CANTEDRAFT_104949 and Debaryomyces hansenii CBS767 : DEHA2A12848g	0.119
orf19.2863.1	ERV1	Predicted component of the mitochondrial intermembrane space (IMS), involved in protein import into mitochondrial intermembrane space	0.119
orf19.2864.1	RPL28	Putative ribosomal protein; Plc1-regulated; downregulated upon phagocytosis by murine macrophage; Spider biofilm repressed	0.11875
orf19.2866	orf19.2866	Has domain(s) with predicted DNA binding activity	0.11875
orf19.2867	orf19.2867	Ortholog(s) have phosphatidylinositol-3-phosphate binding, protein transporter activity and role in ascospore formation, intracellular protein transport, protein retention in Golgi apparatus, retrograde transport, endosome to Golgi	0.11875
orf19.2868	orf19.2868	Protein of unknown function; induced by alpha pheromone in SpiderM medium	0.11875
orf19.2869	orf19.2869	Ortholog of C. dubliniensis CD36 : Cd36_46110, Candida tropicalis MYA-3404 : CTRG_03792 and Candida albicans WO-1 : CAWG_03165	0.1185
orf19.287	orf19.287	Putative NADH-ubiquinone oxidoreductase subunit; Hap43p-repressed gene; repressed by nitric oxide; identified in detergent-resistant membrane fraction (possible lipid raft component)	0.1185
orf19.2870	orf19.2870	Protein of unknown function; rat catheter and Spider biofilm induced	0.1185
orf19.2871	SDH12	Succinate dehydrogenase; soluble protein in hyphae; macrophage-downregulated protein level; downregulated by Efg1p; repressed by nitric oxide; protein present in exponential and stationary growth phase yeast cultures; Hap43p-repressed gene	0.1185
orf19.2873	TOP2	DNA topoisomerase II; catalyzes ATP-dependent DNA relaxation and decatenation in vitro; Y842 predicted to be catalytic; functional homolog of S. cerevisiae Top2p; sensitive to amsacrine or doxorubicin; farnesol-upregulated in biofilm	0.1185
orf19.2875	orf19.2875	Ortholog of S. pombe SPAC1071.09c DNAJ domain protein; Hap43-induced gene	0.11825
orf19.2876	CBF1	Transcription factor; binds ribosomal protein gene promoters and rDNA locus with Tbf1; regulates sulfur starvation-response, respiratory, glycolytic genes; does not bind to centromeres as does S. cerevisiae Cbf1; Spider biofilm repressed	0.11825
orf19.2877	PDC11	Pyruvate decarboxylase; antigenic; on hyphal not yeast cell surface; Hap43, Gcn4, Efg1, Efh1, Hsf1 regulated; fluconazole, farnesol induced; amino acid starvation repressed; flow model biofilm induced; Spider biofilm repressed	0.11825
orf19.2878	PGA15	Putative GPI-anchored protein	0.118
orf19.2879	IFF5	Putative GPI-anchored protein; adhesin-like protein; possibly an essential gene, disruptants not obtained by UAU1 method	0.118
orf19.288	MET13	Putative methionine biosynthesis protein; ketoconazole-induced; amphotericin B repressed; Spider biofilm repressed	0.118
orf19.2881	MNN4	Regulator of mannosylphosphorylation of N-linked mannans to cell wall proteins; no role in virulence or normal interaction with macrophages; mutant induces inflammatory cytokines in dendritic cells; rat catheter and Spider biofilm induced	0.11775
orf19.2882	XUT1	Putative high-affinity, high-capacity xanthine-uric acid/H+ symporter; similar to A. nidulans UapA; member of the Nucleobase-Ascorbate Transporter/Nucleobase-Cation Symporter (NAT/NCS2) family; rat catheter biofilm induced	0.1175
orf19.2883	CSO99	Protein of unknown function; Hap43-repressed gene; protein not conserved in S. cerevisiae	0.1175
orf19.2884	CDC68	Functional homolog of S. cerevisiae Cdc68, a transcription elongation factor; essential; possible drug target	0.1175
orf19.2885	PRI2	Putative DNA primase; gene adjacent to and divergently transcribed with CDC68; Hap43-induced; Spider biofilm repressed	0.1175
orf19.2886	CEK1	ERK-family protein kinase; required for wild-type yeast-hypha switch, mating efficiency, virulence in mice; Cst20-Hst7-Cek1-Cph1 MAPK pathway regulates mating, and invasive hyphal growth under some conditions; Spider biofilm induced	0.11725
orf19.2887	orf19.2887	Ortholog in S. cerevisiae is localizedto the bud, mating projection tip, and associates with ribosomes; Spider biofilm induced	0.11725
orf19.2888	orf19.2888	Ortholog(s) have role in early endosome to Golgi transport, protein complex assembly and Golgi apparatus, TRAPP complex, clathrin-coated vesicle localization	0.117
orf19.2889	orf19.2889	Ortholog(s) have role in chromatin remodeling and Ino80 complex, cytoplasm localization	0.11675
orf19.2890	orf19.2890	Has domain(s) with predicted sugar:hydrogen symporter activity, role in carbohydrate transport and Golgi membrane, integral to membrane localization	0.11675
orf19.2891	orf19.2891	Ortholog(s) have role in cellular response to oxidative stress, misfolded or incompletely synthesized protein catabolic process, protein import into peroxisome matrix and mitochondrial inner membrane localization	0.1165
orf19.2892	orf19.2892	Ortholog of C. dubliniensis CD36 : Cd36_45910, C. parapsilosis CDC317 : CPAR2_501110, Candida tenuis NRRL Y-1498 : CANTEDRAFT_119393 and Debaryomyces hansenii CBS767 : DEHA2E08976g	0.11625
orf19.2893	orf19.2893	Protein of unknown function; regulation correlates with clinical development of fluconazole resistance; transcript is upregulated in an RHE model of oral candidiasis	0.11625
orf19.2895	VMA8	Putative vacuolar H+-ATPase subunit; regulated by Nrg1 and Mig1; transcript increases in populations of cells exposed to fluconazole over multiple generations; rat catheter and Spider biofilm repressed	0.116
orf19.2896	SOU1	Enzyme involved in utilization of L-sorbose; has sorbitol dehydrogenase, fructose reductase, and sorbose reductase activities; NAD-binding site motif; transcriptional regulation affected by chromosome 5 copy number; Hap43p-induced gene	0.116
orf19.2897	SOU2	Protein similar to Sou1; not required for utilization of L-sorbose; Spider biofilm induced	0.116
orf19.2898	orf19.2898	Ortholog(s) have borate efflux transmembrane transporter activity, role in borate transport, protein targeting to vacuole and fungal-type vacuole, plasma membrane localization	0.116
orf19.2899	orf19.2899	Ortholog(s) have cytosol, nucleus localization	0.116
orf19.29	orf19.29	Ortholog of S. cerevisiae Tah11, a DNA replication licensing factor required for pre-replication complex assembly; rat catheter, flow model and Spider biofilm induced	0.116
orf19.290	KRE5	UDP-glucose:glycoprotein glucosyltransferase; 1,6-beta-D-glucan biosynthesis, hyphal growth, virulence in mouse IV model; partially complements S. cerevisiae kre5 mutant defects; flow biofilm repressed, Bcr1-repressed in RPMI a/a biofilms	0.116
orf19.2901	NUP60	Ortholog of S. cerevisiae Nup60p; a subunit of the nuclear pore complex; mutants are viable	0.11575
orf19.2903	AGO1	Putative Argonaute protein involved in RNA silencing; hyphal-induced expression; regulated by Cyr1, Ras1, Efg1, Nrg1, Tup1; rat catheter biofilm repressed	0.1155
orf19.2905	orf19.2905	Ortholog of Candida albicans WO-1 : CAWG_03194	0.1155
orf19.2906	PGA41	Putative GPI-anchored protein; adhesin-like protein	0.11525
orf19.2907	PGA42	Putative GPI-anchored adhesin-like protein; decreased transcription is observed in azole-resistant strains that overexpress CDR1 and CDR2 or MDR1	0.11525
orf19.2907.1	orf19.2907.1	Ortholog(s) have chromatin DNA binding activity, role in positive regulation of transcription from RNA polymerase II promoter by pheromones, threonylcarbamoyladenosine metabolic process and EKC/KEOPS complex, nuclear chromatin localization	0.11525
orf19.2908	orf19.2908	Predicted oxidoreductase; rat catheter biofilm induced	0.11525
orf19.2909	ERG26	C-3 sterol dehydrogenase, catalyzes the 2nd of 3 steps required to remove 2 C-4 methyl groups from an intermediate in ergosterol biosynthesis; amphotericin B, caspofungin repressed; Spider biofilm repressed	0.115
orf19.291	orf19.291	Ortholog(s) have role in cellular response to DNA damage stimulus, protein sumoylation, response to UV-B, response to UV-C and nuclear envelope localization	0.115
orf19.2910	PGA43	Putative GPI-anchored protein	0.11475
orf19.2911	SEC3	Predicted subunit of the exocyst complex, involved in exocytosis; required for hyphal growth after the first septin ring formation; interacts with septins Cdc3p, Cdc10p, and Cdc11p; localizes to a crescent on the surface of the hyphal tip	0.11475
orf19.2914	orf19.2914	Ortholog of C. dubliniensis CD36 : Cd36_45760, C. parapsilosis CDC317 : CPAR2_401920, Candida tenuis NRRL Y-1498 : CANTEDRAFT_126814 and Debaryomyces hansenii CBS767 : DEHA2D16742g	0.11475
orf19.2915	orf19.2915	Ortholog(s) have ATPase activity, GTPase activity, adenosine-diphosphatase activity, cytidine diphosphatase activity, guanosine-diphosphatase activity, nucleoside-triphosphate diphosphatase activity, uridine-diphosphatase activity	0.1145
orf19.2916	orf19.2916	Ortholog of C. dubliniensis CD36 : Cd36_45740, C. parapsilosis CDC317 : CPAR2_401900, Candida tenuis NRRL Y-1498 : CANTEDRAFT_116046 and Pichia stipitis Pignal : PICST_28890	0.1145
orf19.2917	orf19.2917	Putative GTPase; heterozygous null mutant exhibits resistance to parnafungin in the C. albicans fitness test; Hap43p-induced gene	0.1145
orf19.2919	MPH1	Protein similar to S. cerevisiae Mph1p, which is a DNA helicase involved in DNA repair; induced under hydroxyurea treatment	0.1145
orf19.292	orf19.292	Ortholog of C. parapsilosis CDC317 : CPAR2_102390, C. dubliniensis CD36 : Cd36_82960, Candida tenuis NRRL Y-1498 : CANTEDRAFT_133198 and Lodderomyces elongisporus NRLL YB-4239 : LELG_02116	0.11425
orf19.2920	orf19.2920	Ortholog(s) have role in ribosome biogenesis and cytosol, ribosome localization	0.11425
orf19.2921	orf19.2921	Ortholog(s) have alpha-tubulin binding activity, role in protein folding, tubulin complex assembly and cytosol, nucleus localization	0.11425
orf19.2922	orf19.2922	Ortholog(s) have double-stranded DNA binding activity, role in reciprocal meiotic recombination, synapsis and condensed nuclear chromosome localization	0.114
orf19.2923	orf19.2923	Predicted membrane transporter, member of the drug:proton antiporter (14 spanner) (DHA2) family, MFS superfamily; induced by alpha pheromone in SpiderM medium	0.114
orf19.2925	orf19.2925	Ortholog(s) have role in protein folding, tubulin complex assembly and cytoplasm localization	0.114
orf19.2926	orf19.2926	Putative nuclease required for DNA single- and double-strand break repair; rat catheter biofilm induced	0.11375
orf19.2927	MNN11	Ortholog(s) have alpha-1,2-galactosyltransferase activity, alpha-1,6-mannosyltransferase activity	0.11375
orf19.2928	orf19.2928	Ortholog(s) have COPI-coated vesicle, Golgi apparatus localization	0.11375
orf19.2929	GSC1	Essential beta-1,3-glucan synthase subunit; gsc1 allele determines resistance/sensitivity to echinocandins; 16 predicted membrane-spanning regions; mRNA abundance declines after yeast-to-hypha transition; Spider biofilm induced	0.11375
orf19.2930	orf19.2930	Predicted translation initiation factor; role in translational initiation; Spider biofilm repressed	0.1135
orf19.2933	orf19.2933	Ortholog(s) have ubiquitin-specific protease activity, role in protein deubiquitination, regulation of transcription, DNA-dependent and cytosol, nucleus localization	0.1135
orf19.2934	orf19.2934	Similar to S. cerevisiae Bud20; predicted role in cellular bud site selection; rat catheter and Spider biofilm induced	0.11325
orf19.2935	RPL10	Ribosomal protein L10; intron in 5'-UTR; downregulated upon phagocytosis by murine macrophage; transcription regulated by yeast-hypha switch; Spider biofilm repressed	0.113
orf19.2936	orf19.2936	Ortholog of C. parapsilosis CDC317 : CPAR2_106450, C. dubliniensis CD36 : Cd36_02330, Lodderomyces elongisporus NRLL YB-4239 : LELG_01618 and Candida orthopsilosis Co 90-125 : CORT_0B07690	0.11275
orf19.2937	PMM1	Phosphomannomutase; enzyme of O- and N-linked mannosylation; interconverts mannose-6-phosphate and mannose-l-phosphate; functional homolog of S. cerevisiae Sec53; antigenic in mice; Hap43-induced; flow model and Spider biofilm repressed	0.1125
orf19.2938	orf19.2938	Putative mitochondrial inner membrane protein with a predicted role in the assembly of respiratory complex III; Hap43p-repressed gene; S. cerevisiae ortholog FMP25 localizes to mitochondrion	0.1125
orf19.2939	orf19.2939	Ortholog(s) have mitochondrion localization	0.11225
orf19.2940	orf19.2940	Putative v-SNARE of the endoplasmic reticulum membrane; possibly an essential gene, disruptants not obtained by UAU1 method	0.11225
orf19.2941	SCW4	Putative cell wall protein; substrate for Kex2p processing in vitro; expression regulated by white-opaque switch; alkaline repressed; possibly essential (UAU1 method); flow model biofilm induced; Spider biofilm induced	0.112
orf19.2942	DIP5	Dicarboxylic amino acid permease; mutation confers hypersensitivity to toxic ergosterol analog; induced upon phagocytosis by macrophage; Gcn4-regulated; upregulated by Rim101 at pH 8; rat catheter and Spider biofilm induced	0.112
orf19.2943.5	orf19.2943.5	Ortholog of Candida albicans WO-1 : CAWG_05543	0.112
orf19.2945	PUT4	Putative proline permease; fungal-specific (no human or murine homolog); repressed during the mating process	0.11175
orf19.2946	HNM4	Putative choline permease; fungal-specific (no human or murine homolog)	0.1115
orf19.2947	SNZ1	Stationary phase protein; vitamin B synthesis; induced byyeast-hypha switch, 3-AT or in azole-resistant strain overexpressing MDR1; soluble in hyphae; regulated by Gcn4, macrophage; Spider biofilm induced; rat catheter biofilm repressed	0.1115
orf19.2948	SNO1	Protein with a predicted role in pyridoxine metabolism; stationary phase protein; regulated by Tup1, Efg1; Spider biofilm induced	0.1115
orf19.2949	IML1	Putative protein with a role in autophagy; rat catheter biofilm induced	0.1115
orf19.295	orf19.295	Ortholog of C. dubliniensis CD36 : Cd36_82970, Lodderomyces elongisporus NRLL YB-4239 : LELG_02117, Debaryomyces hansenii CBS767 : DEHA2G01012g and Candida lusitaniae ATCC 42720 : CLUG_03529	0.11125
orf19.2951	HOM6	Putative homoserine dehydrogenase; Gcn4-regulated; induced by amino acid starvation (3-ATtreatment); macrophage-induced protein; protein level decreases in stationary phase cultures; flow model biofilm repressed	0.11125
orf19.2952	EXG2	GPI-anchored cell wall protein, similar to S. cerevisiae exo-1,3-beta-glucosidase Exg2p; predicted Kex2p substrate; induced during cell wall regeneration; possibly an essential gene, disruptants not obtained by UAU1 method; Hap43p-repressed	0.111
orf19.2953	TOM20	Putative mitochondrial primary import receptor	0.111
orf19.2954	orf19.2954	Protein of unknown function; Hap43-repressed gene; repressed by nitric oxide	0.111
orf19.2956	MGM101	Putative mitochondrial genome maintenance protein; fungal-specific (no human or murine homolog); mutation confers hypersensitivity to tubercidin (7-deazaadenosine)	0.111
orf19.2957	orf19.2957	Protein required for transfer of mannosylphosphate; induced by alpha pheromone in SpiderM medium	0.11075
orf19.2958	orf19.2958	Planktonic growth-induced gene	0.11075
orf19.2959.1	orf19.2959.1	Gene induced by hypoxia and ketoconazole; oral infection upregulated; mutants have reduced capacity to damage oral epithelial cells; Spider biofilm induced	0.1105
orf19.296	orf19.296	Ortholog of C. dubliniensis CD36 : Cd36_82980, C. parapsilosis CDC317 : CPAR2_102360, Candida tenuis NRRL Y-1498 : cten_CGOB_00165 and Debaryomyces hansenii CBS767 : DEHA2G00990g	0.11025
orf19.2960	FRS2	Putative tRNA-Phe synthetase; downregulated upon phagocytosis by murine macrophage; protein present in exponential and stationary growth phase yeast cultures; Spider biofilm repressed	0.11
orf19.2961	orf19.2961	Putative transcription factor with zinc finger DNA-binding motif	0.11
orf19.2962	orf19.2962	Protein of unknown function; Spider biofilm induced	0.11
orf19.2963	orf19.2963	Has domain(s) with predicted NAD+ binding activity	0.11
orf19.2964	orf19.2964	Ortholog(s) have DNA translocase activity	0.10975
orf19.2965	orf19.2965	Putative guanyl-nucleotide exchange factor; Spider biofilm repressed	0.10975
orf19.2965.1	orf19.2965.1	Protein of unknown function; similar to human SERF2; gene has an alternatively spliced intron	0.10975
orf19.2966	orf19.2966	Predicted dienelactone hydrolase domain; clade-associated gene expression; farnesol-downregulated; rat catheter biofilm repressed	0.1095
orf19.2967	TIF34	Putative translation initiation factor eIF3, p39 subunit; mutation confers hypersensitivity to roridin A, verrucarin A; downregulated upon phagocytosis by murine macrophages; Spider biofilm repressed	0.1095
orf19.2968	orf19.2968	Protein of unknown function; Spider biofilm induced	0.1095
orf19.2969	RAD16	Ortholog of S. cerevisiae Rad16; a protein that recognizes and binds damaged DNA; flucytosine induced; rat catheter and Spider biofilm induced	0.1095
orf19.297	DTD2	Ortholog(s) have D-leucyl-tRNA(Leu) deacylase activity, D-tyrosyl-tRNA(Tyr) deacylase activity, role in D-leucine catabolic process, D-tyrosine catabolic process, tRNA metabolic process and cytosol, nucleus localization	0.1095
orf19.2970	LYS2	Heterodimeric alpha-aminoadipate reductase large subunit; lysine biosynthesis; predicted binding sites for AMP and alpha-aminoadipate; inhibited by lys or thialysine; regulated by Gcn2 and Gcn4; Spider biofilm induced, flow model repressed	0.10925
orf19.2971	orf19.2971	Ortholog of C. dubliniensis CD36 : Cd36_02630, C. parapsilosis CDC317 : CPAR2_108390, Candida tenuis NRRL Y-1498 : CANTEDRAFT_115724 and Debaryomyces hansenii CBS767 : DEHA2D07986g	0.10925
orf19.2972	PDE2	High affinity cyclic nucleotide phosphodiesterase; moderates signaling by cAMP; required for virulence, switching, cell wall, hyphal, not pseudohyphal growth; expressed shortly after hyphal induction; rat catheter and Spider biofilm induced	0.109
orf19.2973	orf19.2973	Ortholog(s) have RNA binding, flap-structured DNA binding activity and role in nuclear-transcribed mRNA poly(A) tail shortening, positive regulation of endodeoxyribonuclease activity	0.10875
orf19.2974	YKT6	Putative protein of the vacuolar SNARE complex; predicted role in vacuolar fusion; rat catheter biofilm repressed	0.10875
orf19.2975	YPT7	Protein of YPT/RAB family; induced during the mating process	0.1085
orf19.2977	MIA40	Predicted component of the mitochondrial intermembrane space import machinery; Hap43p-repressed gene	0.1085
orf19.2978	orf19.2978	Protein of unknown function; Hap43-repressed gene	0.108
orf19.298	orf19.298	Protein of unknown function; flow model biofilm induced	0.108
orf19.2980	orf19.2980	Ortholog(s) have ATP-dependent RNA helicase activity and role in generation of catalytic spliceosome for first transesterification step, spliceosomal complex disassembly	0.108
orf19.2982	orf19.2982	Ortholog(s) have protein complex scaffold, protein kinase activator activity	0.108
orf19.2983	CDC73	Putative transcription elongation factor; cdc73 kap114 double transposon mutation affects filamentous growth; Spider biofilm repressed	0.1075
orf19.2984	MST1	Ortholog(s) have role in mitochondrial threonyl-tRNA aminoacylation and mitochondrion localization	0.1075
orf19.2985	orf19.2985	Protein of unknown function; Hap43-repressed gene	0.1075
orf19.2986	orf19.2986	Ortholog of C. dubliniensis CD36 : Cd36_02750, C. parapsilosis CDC317 : CPAR2_106015, Candida tenuis NRRL Y-1498 : CANTEDRAFT_107500 and Debaryomyces hansenii CBS767 : DEHA2D08250g	0.10725
orf19.2987	orf19.2987	Ortholog(s) have role in cellular ion homeostasis, establishment or maintenance of cell polarity, mitochondrion inheritance, regulation of cardiolipin metabolic process and mitochondrial inner membrane, nucleus localization	0.10725
orf19.2988	orf19.2988	Predicted aminotransferase based on S. pombe ortholog SPBC660.12c; flow model biofilm induced	0.107
orf19.2989	GOR1	Ortholog(s) have glyoxylate reductase activity, role in glyoxylate catabolic process and cytosol, extracellular region, mitochondrion, nucleus localization	0.107
orf19.299	ECM14	Ortholog(s) have endoplasmic reticulum, fungal-type vacuole localization	0.107
orf19.2990	XOG1	Exo-1,3-beta-glucanase; 5 glycosyl hydrolase family member; affects sensitivity to chitin and glucan synthesis inhibitors; not required for yeast-to-hypha transition or for virulence in mice; Hap43-induced; Spider biofilm induced	0.107
orf19.2991	HOL1	Putative MFS transporter; regulated by Nrg1; macrophage/pseudohyphal-repressed; induced by alpha pheromone in SpiderM medium; possibly an essential gene, disruptants not obtained by UAU1 method	0.107
orf19.2992	RPP1A	Conserved acidic ribosomal protein; likely role in regulation of translation elongation; interacts with Rpp2B; 1 of 4 similar C. albicans ribosomal proteins (Rpp1A, Rpp1Bp, Rpp2A, Rpp2B); Hap43-induced; Spider biofilm repressed	0.1065
orf19.2994	RPL13	Putative ribosomal subunit; antigenic during murine infection; downregulated upon phagocytosis by murine macrophage; Spider biofilm repressed	0.1065
orf19.2994.1	RPS16A	Putative 40S ribosomal subunit; macrophage/pseudohyphal-induced after 16 h; Spider biofilm repressed	0.1065
orf19.2995	orf19.2995	Protein of unknown function; induced by nitric oxide; rat catheter and Spider biofilm induced	0.10625
orf19.2996	orf19.2996	Ortholog(s) have cytoplasm localization	0.10625
orf19.2998	TSR2	Protein with a predicted role in pre-rRNA processing; repressed by prostaglandins	0.106
orf19.30	SPF1	P-type calcium-transporting ATPase, involved in control of calcium homeostasis, response to ER stress, hyphal growth, biofilm formation and virulence	0.106
orf19.300	AIP2	Putative actin interacting protein; regulated by Gcn4; induced in response to amino acid starvation (3-AT); repressed by elevated CO2; flow model biofilm repressed	0.106
orf19.3000	ORC1	Putative origin recognition complex large subunit; essential for viability; similar to S. cerevisiae Orc1p origin recognition complex subunit	0.10575
orf19.3001	TEM1	Protein similar to S. cerevisiae Tem1p, which is a GTPase involved in termination of the M phase of the cell cycle; induced under Cdc5p depletion	0.10575
orf19.3002	RPS1	Putative ribosomal protein 10 of the 40S subunit; elicits host antibody response during infection; transcript induced during active growth; Spider biofilm repressed	0.10575
orf19.3003	orf19.3003	Putative lipid-binding protein with a predicted role in calcium-dependent phospholipid-binding	0.1055
orf19.3003.1	RPL6	Ortholog of S. cerevisiae ribosomal subunit, Rpl6B; transposon mutation affects filamentous growth; translation-related genes are downregulated upon phagocytosis by murine macrophage; Hap43-induced; Spider biofilm repressed	0.1055
orf19.3004	orf19.3004	Ortholog(s) have fungal-type vacuole localization	0.10525
orf19.3006	GGA2	Protein involved in Golgi trafficking; rat catheter and Spider biofilm repressed	0.10525
orf19.3007	orf19.3007	Ortholog(s) have role in endosome organization, regulation of protein localization and BLOC-1 complex localization	0.10525
orf19.3007.2	orf19.3007.2	Ortholog of C. dubliniensis CD36 : Cd36_02950, C. parapsilosis CDC317 : CPAR2_108520, Candida tenuis NRRL Y-1498 : CANTEDRAFT_100285 and Debaryomyces hansenii CBS767 : DEHA2G15774g	0.10525
orf19.3008	COQ4	Protein with a putative role in coenzyme Q biosynthesis; transcriptionally induced by interaction with macrophage; Hap43p-repressed gene	0.105
orf19.3009	orf19.3009	Ortholog of S. cerevisiae : YDR179W-A, C. glabrata CBS138 : CAGL0F05819g, C. dubliniensis CD36 : Cd36_02970, C. parapsilosis CDC317 : CPAR2_108540 and Candida tenuis NRRL Y-1498 : CANTEDRAFT_132957	0.105
orf19.301	PGA18	Putative GPI-anchored protein; regulated by Nrg1, Tup1; rat catheter biofilm repressed	0.10475
orf19.3010	orf19.3010	Putative lipoyl ligase; role in modification of mitochondrial enzymes by attachment of lipoic acid groups; rat catheter biofilm induced	0.10475
orf19.3010.1	ECM33	GPI-anchored cell wall protein; mutants show cell-wall defects and reduced adhesion, host cell damage, and endocytosis; mutant infection is immunoprotective in murine model; fluconazole-induced; caspofungin repressed	0.10475
orf19.3012	ARO80	Zn(II)2Cys6 transcription factor; transcriptional activator of aromatic amino acid catabolism; regulator of aromatic alcohol biosynthesis via the Ehrlich pathway; mutant is viable	0.10475
orf19.3013	CDC12	Septin; essential for viability; forms ring at sites of cell division and also forms filaments in mature chlamydospore; filamentous growth induced; regulated by Nrg1, Tup1, tyrosol and cell density; rat catheter biofilm repressed	0.10475
orf19.3014	BMH1	Sole 14-3-3 protein in C. albicans; role in hyphal growth; possibly regulated by host interaction; localizes to yeast-form cell surface, not hyphae; alternatively spliced 5' UTR intron; Spider biofilm repressed	0.1045
orf19.3015	ARX1	Putative ribosomal large subunit biogenesis protein; repressed in core stress response; repressed by prostaglandins	0.10425
orf19.3016	orf19.3016	Ortholog(s) have role in meiotic chromosome segregation and cytosol, nucleus localization	0.10425
orf19.3018	SPP1	Putative histone methyltransferase; induced by nitric oxide independent of Yhb1p; cell-cycle regulated periodic mRNA expression	0.104
orf19.3019	orf19.3019	Putative DNA-dependent ATPase; transcription may be increased in an azole-resistant strain that overexpresses MDR1	0.104
orf19.302	orf19.302	Ortholog(s) have Rab guanyl-nucleotide exchange factor activity, role in ER to Golgi vesicle-mediated transport and TRAPP complex, cytosol, nucleus localization	0.10375
orf19.3021	orf19.3021	Putative protein of unknown function; Hap43-repressed gene; Spider biofilm induced	0.10375
orf19.3022	orf19.3022	Ortholog(s) have structural constituent of ribosome activity and mitochondrial small ribosomal subunit localization	0.10375
orf19.3023	NGG1	Ortholog(s) have histone acetyltransferase activity and role in cellular response to cadmium ion, detoxification of cadmium ion, histone acetylation, regulation of transcription from RNA polymerase II promoter	0.10375
orf19.3026	MAS1	Putative mitochondrial processing protease; Hap43-repressed; transcript regulated by Nrg1; oxidative stress-induced via Cap1	0.10375
orf19.3027	orf19.3027	Putative DNA translocase; Spider biofilm repressed	0.1035
orf19.3029	orf19.3029	Predicted 3-hydroxyisobutyryl-CoA hydrolase; mitochondrially localized; Spider biofilm induced	0.1035
orf19.3030	orf19.3030	Ortholog(s) have phosphatidylinositol binding activity	0.1035
orf19.3031	SEC62	Putative endoplasmic reticulum (ER) protein-translocation complex subunit	0.1035
orf19.3034	RLI1	Member of RNase L inhibitor (RLI) subfamily of ABC family; predicted not to be a transporter; regulated by Sef1p, Sfu1p, and Hap43p	0.1035
orf19.3035	orf19.3035	Ortholog(s) have ATP-dependent DNA helicase activity, chromatin DNA binding, methylated histone residue binding, rDNA binding activity	0.1035
orf19.3037	orf19.3037	Putative poly(A)-binding protein; regulated by Gcn4p; induced in response to amino acid starvation (3-AT treatment); protein present in exponential and stationary growth phase yeast cultures	0.1035
orf19.3038	TPS2	Trehalose-6-phosphate (Tre6P) phosphatase; mutant heat sensitive, accumulates Tre6P, decreased mouse virulence; possible drug target; 2 conserved phospohydrolase motifs; no mammalian homolog; Hap43-repressed; flow model biofilm induced	0.1035
orf19.304	orf19.304	Putative transporter similar to MDR proteins; fungal-specific; Spider biofilm induced	0.1035
orf19.3040	EHT1	Putative acyl-coenzymeA:ethanol O-acyltransferase; regulated by Sef1, Sfu1, and Hap43; induced by alpha pheromone in SpiderM medium; Spider biofilm induced; promoter bound by Ndt80	0.10325
orf19.3041	orf19.3041	Ortholog(s) have ubiquitin protein ligase binding activity	0.103
orf19.3042	orf19.3042	Protein of unknown function; Hap43-induced; rat catheter biofilm induced	0.103
orf19.3043	orf19.3043	Ortholog(s) have triglyceride lipase activity, role in triglyceride catabolic process and mitochondrion localization	0.103
orf19.3045	orf19.3045	Predicted aldehyde dehydrogenase domain; virulence-group-correlated expression	0.103
orf19.3047	orf19.3047	Protein kinase-related protein, required for normal sensitivity to caspofungin	0.10275
orf19.3048	orf19.3048	Protein of unknown function; repressed by alpha pheromone in SpiderM medium	0.10275
orf19.3049	orf19.3049	Ortholog(s) have protein kinase activity, role in activation of bipolar cell growth, ascospore wall assembly, protein phosphorylation and cell division site, cytosol, nucleus, prospore membrane localization	0.10275
orf19.305	orf19.305	Protein of unknown function; upregulated in a cyr1 null mutant	0.10275
orf19.3050	AGE1	Putative GTPase activator; induced in low iron; rat catheter biofilm repressed	0.10275
orf19.3051	orf19.3051	Protein of unknown function; S. pombe ortholog SPAC17A2.02c plays a role in resistance to cadmium; colony morphology-related gene regulation by Ssn6; Spider biofilm repressed	0.10225
orf19.3052	YPT1	Functional homolog of S. cerevisiae Ypt1p, which is an essential small Ras-type GTPase involved in protein secretion at ER-to-Golgi; dominant-negative mutation causes SAP secretion defect and accumulation of intracellular secretory vesicles	0.10225
orf19.3053	orf19.3053	Protein of unknown function; present in exponential and stationary phase yeast; identified in extracts from biofilm and planktonic cells; flow model biofilm induced gene; GlcNAc-induced protein	0.102
orf19.3054	RPN3	Putative non-ATPase regulatory subunit of the 26S proteasome lid; amphotericin B repressed; oxidative stress-induced via Cap1p	0.10175
orf19.3055	MED17	Putative RNA polymerase II mediator complex subunit; possibly an essential gene, disruptants not obtained by UAU1 method	0.1015
orf19.3057	orf19.3057	Ortholog(s) have role in mitochondrial genome maintenance and endoplasmic reticulum localization	0.1015
orf19.3058	COQ6	Ortholog(s) have role in ubiquinone biosynthetic process and mitochondrial inner membrane localization	0.10125
orf19.3059	SUA71	Transcription factor TFIIB; required for transcription initiation and start site selection by RNA polymerase II; downregulated during planktonic growth, whereas related SUA72 is induced; induced by Tbf1; rat catheter, Spider biofilm induced	0.10125
orf19.306	USO5	Putative type II myosin heavy chain; transcription is induced upon filamentous growth and in response to alpha pheromone in SpiderM medium	0.10125
orf19.3060	orf19.3060	OPutative dolichyl-diphosphooligosaccharide-protein glycotransferase; role in protein N-linked glycosylation; Spider biofilm repressed	0.10125
orf19.3061	IMP1	Predicted subunit of the mitochondrial inner membrane peptidase complex involved in protein targeting to mitochondria	0.101
orf19.3061.1	orf19.3061.1	Ortholog of S. cerevisiae Rps22Ap and Rps22Bp; gene contains 5' UTR intron	0.101
orf19.3062	orf19.3062	Ortholog(s) have role in chromatin remodeling and ASTRA complex, mitochondrion localization	0.10075
orf19.3063	HFL1	HAP5-like; ortholog of S. cerevisiae Dpb3; third-largest subunit of DNA polymerase II (DNA polymerase epsilon); phosphorylated protein; mutants have a growth defect	0.1005
orf19.3064	MRPL27	Putative 60S ribosomal protein L27, mitochondrial precursor	0.1005
orf19.3065	DAO1	Putative D-amino acid oxidase; transcription is regulated upon yeast-hyphal switch	0.10025
orf19.3066	ENG1	Endo-1,3-beta-glucanase; ortholog of S. cerevisiae Dse4 needed for cell separation; caspofungin, fluconazole repressed; repressed by alpha pheromone in SpiderM medium; flow model biofilm induced; rat catheter biofilm repressed	0.10025
orf19.307	orf19.307	Ortholog(s) have transcription coactivator activity, role in histone acetylation, transcription from RNA polymerase II promoter and Ada2/Gcn5/Ada3 transcription activator complex, SAGA complex, SLIK (SAGA-like) complex localization	0.10025
orf19.3071	MIH1	Putative protein phosphatase of the PTP family (tyrosine-specific); ortholog of S. cerevisiae Mih1; mRNA binds She3	0.1
orf19.3073	orf19.3073	Protein of unknown function	0.09975
orf19.3074	TLO10	Member of a family of telomere-proximal genes of unknown function	0.0995
orf19.3076	orf19.3076	Ortholog(s) have role in vesicle-mediated transport and COPI-coated vesicle, integral to Golgi membrane localization	0.0995
orf19.3077	VID21	Subunit of the NuA4 histone acetyltransferase complex; soluble protein in hyphae; Spider biofilm repressed	0.09925
orf19.308	orf19.308	Ortholog(s) have role in nucleobase-containing compound transport and plasma membrane localization	0.099
orf19.3080	orf19.3080	Ortholog(s) have role in attachment of spindle microtubules to kinetochore, cellular response to nitrogen starvation, cohesin localization to chromatin and double-strand break repair, more	0.09875
orf19.3083	orf19.3083	Putative lipid phosphatase of the endoplasmic reticulum; role in DNA repair, actin cytoskeleton organization, cellular manganese ion homeostasis; Spider biofilm repressed	0.09875
orf19.3084	orf19.3084	Ortholog(s) have histone acetyltransferase activity, role in chromatin silencing at telomere and SAS acetyltransferase complex, nuclear chromatin localization	0.09875
orf19.3086	SEC10	Ortholog(s) have role in Golgi to plasma membrane transport, cytokinetic cell separation, exocytosis and cell cortex of cell tip, cell division site, cytosol, exocyst, mating projection tip, mitotic spindle pole body, nucleus localization	0.0985
orf19.3087	UBI3	Fusion of ubiquitin with the S34 protein of the small ribosomal subunit; mRNA decreases upon heat shock, appears to be degraded; functional homolog of S. cerevisiae RPS31; Hap43-induced; Spider biofilm repressed	0.0985
orf19.3088	orf19.3088	bZIP transcription factor; possibly transcriptionally regulated upon hyphal formation; Hap43; F-12/CO2 early biofilm induced; Spider biofilm induced	0.09825
orf19.3089	orf19.3089	Predicted mitochondrial intermembrane space protein; predicted role in phospholipid metabolism; rat catheter and Spider biofilm induced	0.098
orf19.309	DAL5	Allantoate permease; nitrogen catabolite repressed, induced in absence of preferred N sources; nitrogen source regulation requires Gat1; possibly essential gene (by UAU1 method); Hap43-repressed	0.098
orf19.3091	orf19.3091	Protein of unknown function; repressed during core stress response	0.098
orf19.3093	MSH2	Putative DNA mismatch repair factor; transcript regulated by Nrg1; flucytosine repressed; transcript regulated by tyrosol and cell density	0.09775
orf19.3097	PDA1	Putative pyruvate dehydrogenase alpha chain; fluconazole-induced; protein present in exponential and stationary growth phase yeast cultures; Hap43-induced; Spider biofilm repressed	0.09775
orf19.3098	orf19.3098	Predicted RNA-dependent ATPase RNA helicase; Hap43-induced gene	0.09775
orf19.3099	TRP4	Predicted enzyme of amino acid biosynthesis; upregulated in biofilm; regulated by Gcn2p and Gcn4p; S. cerevisiae ortholog is Gcn4p regulated	0.0975
orf19.31	orf19.31	Ortholog of C. parapsilosis CDC317 : CPAR2_201960, C. dubliniensis CD36 : Cd36_20900, Candida tropicalis MYA-3404 : CTRG_04756 and Candida albicans WO-1 : CAWG_04394	0.097
orf19.310	orf19.310	Putative mitochondrial protein with a predicted role in cell wall biogenesis; possibly an essential gene, disruptants not obtained by UAU1 method	0.097
orf19.3100	orf19.3100	Protein with t-SNARE domains and a microtubule associated domain; Hap43-induced gene; repressed by alpha pheromone in SpiderM medium	0.097
orf19.3102	CTA6	Protein that activates transcription in 1-hybrid assay in S. cerevisiae	0.097
orf19.3103	orf19.3103	Ortholog(s) have RNA polymerase III activity, role in tRNA transcription from RNA polymerase III promoter and DNA-directed RNA polymerase III complex, cytoplasm localization	0.0965
orf19.3104	YDC1	Alkaline dihydroceramidase; involved in sphingolipid metabolism; Mob2-dependent hyphal regulation; transcript is regulated by Nrg1 and Mig1; Hap43-repressed	0.0965
orf19.3105	orf19.3105	Putative cytochrome P450 protein; possibly an essential gene, disruptants not obtained by UAU1 method	0.09625
orf19.3106	MET16	Putative 3'-phosphoadenylsulfate reductase; sulfur amino acid metabolism; reports differ on regulation during biofilm formation; fungal-specific; possibly an essential gene, disruptants not obtained by UAU1 method; Hap43p-repressed gene	0.09625
orf19.3107	orf19.3107	Ortholog of C. dubliniensis CD36 : Cd36_46490, Pichia stipitis Pignal : PICST_33598, Spathaspora passalidarum NRRL Y-27907 : spas_CGOB_00037 and Candida tropicalis MYA-3404 : CTRG_03758	0.09625
orf19.3108	orf19.3108	Putative DNA repair methyltransferase; induced by nitric oxide independent of Yhb1; Spider biofilm induced	0.09625
orf19.3109	orf19.3109	Ortholog of C. dubliniensis CD36 : Cd36_46470, C. parapsilosis CDC317 : CPAR2_500900, Debaryomyces hansenii CBS767 : DEHA2B15730g and Candida tropicalis MYA-3404 : CTRG_03755	0.096
orf19.3110	orf19.3110	Possible mannosyltransferase; Spider biofilm induced	0.096
orf19.3111	PRA1	Cell surface protein that sequesters zinc from host tissue; enriched at hyphal tips; released extracellularly; binds to host complement regulators; mediates leukocyte adhesion and migration; immunogenic in mouse; produced at ambient pH	0.09575
orf19.3112	ZRT1	Putative zinc transporter; acts with Pra1 in sequestration of zinc from host tissues during infection; hyphal, macrophage-induced; alkaline induced upon adherence to polystyrene; induced in oralpharyngeal candidasis; Spider biofilm induced	0.0955
orf19.3113	orf19.3113	Protein of unknown function; Spider biofilm induced	0.0955
orf19.3114	orf19.3114	Predicted pseudouridine synthase; Spider biofilm induced	0.0955
orf19.3115	orf19.3115	Protein of unknown function; rat catheter and Spider biofilm induced	0.09525
orf19.3116	EXM2	Putative U1 snRNP complex compotent; decreased transcription is observed upon fluphenazine treatment	0.09475
orf19.3117	CSA2	Extracellular-associated protein; repressed by Rim101 at pH 8; regulated by Tsa1, Tsa1B in minimal media at 37 deg; induced by ketoconazole, nitric oxide, Hap43; required for normal RPMI biofilm formation; Bcr1 induced in RPMI	0.0945
orf19.3120	orf19.3120	PDR-subfamily ABC transporter (half-size); similar to WHITE subfamily proteins; repressed by fluphenazine treatment or in an azole-resistant strain that overexpresses CDR1 and CDR2; induced by nitric oxide; rat catheter biofilm induced	0.0945
orf19.3121	GST1	Putative glutathione S-transferase; upregulated in the presence of human neutrophils; expression is regulated upon white-opaque switching; increased transcription is observed upon benomyl treatment	0.0945
orf19.3122	ARR3	Ortholog of S. cerevisiae Arr3; arsenite transporter of the plasma membrane required for resistance to arsenic compounds; benomyl-induced; Gcn4-regulated; Hap43-repressed; mutant is viable; Spider biofilm induced	0.09425
orf19.3122.2	orf19.3122.2	Ortholog(s) have role in exocytosis, filamentous growth, mRNA export from nucleus, proteasome assembly, proteasome-mediated ubiquitin-dependent protein catabolic process, regulation of cell cycle	0.094
orf19.3123	RPT5	26S proteasome regulatory subunit; transcript regulated by Nrg1 and Mig1; regulated by Gcn2 and Gcn4; protein level decreases in stationary phase	0.094
orf19.3123.2	orf19.3123.2	Ortholog(s) have cytidine deaminase activity, role in cytidine catabolic process, deoxycytidine catabolic process, pyrimidine-containing compound salvage and cytosol, nucleus localization	0.094
orf19.3124	orf19.3124	Ortholog(s) have mRNA binding, metalloaminopeptidase activity, role in negative regulation of gene expression, protein initiator methionine removal involved in protein maturation and cytosolic ribosome, nucleolus localization	0.094
orf19.3125	orf19.3125	Ortholog(s) have cytosol, nucleus localization	0.094
orf19.3126	CCT6	Putative cytosolic chaperonin Cct ring complex subunit; mutation confers hypersensitivity to cytochalasin D; GlcNAc-induced protein; Spider biofilm repressed	0.0935
orf19.3127	CZF1	Transcription factor; regulates white-opaque switch; hyphal growth regulator; expression in S. cerevisiae causes dominant-negative inhibition of pheromone response; required for yeast cell adherence to silicone; Spider biofilm induced	0.0935
orf19.3128	orf19.3128	Ortholog(s) have syntaxin binding activity and role in ER to Golgi vesicle-mediated transport, positive regulation of SNARE complex assembly, retrograde vesicle-mediated transport, Golgi to ER, vesicle fusion with Golgi apparatus	0.0935
orf19.3129	orf19.3129	Putative chromatin remodelling complex protein; heterozygous null mutant displays sensitivity to virgineone; Spider biofilm repressed	0.0935
orf19.313	DAL4	Putative allantoin permease; fungal-specific (no human or murine homolog)	0.093
orf19.3130	orf19.3130	Ortholog of S. cerevisiae Gpn3 a GTPase with a role in biogenesis of RNA pol II and polIII; possibly an essential gene, disruptants not obtained by UAU1 method	0.093
orf19.3131	OYE32	NAD(P)H oxidoreductase family protein; induced by nitric oxide, amphotericin B, oxidative stress via Cap1; upregulation associated with MDR1 overexpression or benomyl treatment; macrophage-downregulated protein; Spider biofilm induced	0.093
orf19.3132	orf19.3132	Predicted endoplasmic reticulum zinc transporter; induced by nitric oxide	0.093
orf19.3133	GUT2	Glycerol-3-phosphate dehydrogenase; Plc1p-regulated; rat catheter biofilm induced; Spider biofilm induced	0.0925
orf19.3134	orf19.3134	Protein of unknown function; flow model biofilm induced	0.0925
orf19.3135	orf19.3135	Ortholog(s) have protein binding, bridging activity and role in ER-associated ubiquitin-dependent protein catabolic process, lipid particle organization	0.09225
orf19.3136	orf19.3136	Ortholog(s) have transcription coactivator activity, role in DNA repair, cellular carbohydrate metabolic process and cytoplasm localization	0.09225
orf19.3138	NOP1	Nucleolar protein; flucytosine induced; Hap43-induced; Spider biofilm repressed	0.09225
orf19.3139	orf19.3139	Putative NADP-dependent oxidoreductase; Hap43-repressed; induced by benomyl treatment; oxidative stress-induced via Cap1; rat catheter biofilm repressed	0.092
orf19.314	orf19.314	Ortholog of S. cerevisiae : STB6, C. dubliniensis CD36 : Cd36_83110, C. parapsilosis CDC317 : CPAR2_103210, Candida tenuis NRRL Y-1498 : CANTEDRAFT_133418 and Debaryomyces hansenii CBS767 : DEHA2G08382g	0.092
orf19.3140	orf19.3140	Ortholog of Candida albicans WO-1 : CAWG_03159	0.09175
orf19.3140.1	orf19.3140.1	Ortholog(s) have role in cellular response to DNA damage stimulus, proteasome assembly, ubiquitin-dependent protein catabolic process and cytosol, nucleus localization	0.09175
orf19.3141	orf19.3141	Ortholog(s) have role in ER to Golgi vesicle-mediated transport and cytoplasmic mRNA processing body, endoplasmic reticulum membrane, extrinsic to membrane localization	0.0915
orf19.3142	orf19.3142	Ortholog of C. dubliniensis CD36 : Cd36_46140, C. parapsilosis CDC317 : CPAR2_501210, Candida tenuis NRRL Y-1498 : CANTEDRAFT_97195 and Debaryomyces hansenii CBS767 : DEHA2E08800g	0.09125
orf19.3147	orf19.3147	Ortholog of C. dubliniensis CD36 : Cd36_21050, C. parapsilosis CDC317 : CPAR2_104310, Candida tenuis NRRL Y-1498 : CANTEDRAFT_104515 and Debaryomyces hansenii CBS767 : DEHA2F01650g	0.09125
orf19.3148	orf19.3148	Protein of unknown function; possibly an essential gene, disruptants not obtained by UAU1 method	0.09125
orf19.3149	LSP1	Eisosome component with a predicted role in endocytosis; protein present in exponential and stationary growth phase yeast cultures; caspofungin repressed; biofilm induced; fungal-specific (no human/murine homolog); sumoylation target	0.09125
orf19.315	orf19.315	Ortholog of C. dubliniensis CD36 : Cd36_83120, C. parapsilosis CDC317 : CPAR2_103220, Candida tenuis NRRL Y-1498 : CANTEDRAFT_112860 and Debaryomyces hansenii CBS767 : DEHA2G08360g	0.091
orf19.3150	GRE2	Putative reductase; Nrg1 and Tup1-regulated; benomyl- and hyphal-induced; macrophage/pseudohyphal-repressed; repressed by low iron; possibly involved in osmotic stress response; stationary phase enriched protein; Spider biofilm induced	0.091
orf19.3151	orf19.3151	Has domain(s) with predicted catalytic activity, coenzyme binding activity and role in cellular metabolic process	0.091
orf19.3152	AMO2	Protein similar to A. niger predicted peroxisomal copper amino oxidase; mutation confers hypersensitivity to toxic ergosterol analog; F-12/CO2 early biofilm induced	0.091
orf19.3153	MSS4	Phosphatidylinositol-4-phosphate 5-kinase; activity induced by phosphatidic acid (Pld1 product); macrophage/pseudohyphal-repressed; mRNA binds to She3, localized to yeast cell buds and hyphal tips; Hap43-induced; Spider biofilm induced	0.091
orf19.3154	orf19.3154	Ortholog(s) have mitochondrial membrane localization	0.09075
orf19.3156	orf19.3156	Protein of unknown function; induced by Mnl1 under weak acid stress	0.0905
orf19.3158	orf19.3158	Ortholog(s) have cytoplasm localization	0.0905
orf19.3159	UTP20	Putative snoRNA-binding protein; S. cerevisiae Utp20 ortholog; likely essential for growth; repressed in core stress response; mutation confers resistance to 5-fluorocytosine (5-FC) and parnafungin	0.09025
orf19.3159.4	orf19.3159.4	Ortholog of Candida albicans WO-1 : CAWG_04594	0.09025
orf19.316	SEC13	Putative protein transport factor; antigenic during murine systemic infection; macrophage-downregulated protein; protein level decreases in stationary phase cultures; Spider biofilm repressed	0.09
orf19.3160	HSP12	Heat-shock protein; induced by osmotic/oxidative/cadmium stress, fluphenazine treatment, low iron, CDR1 and CDR2 overexpression, or ssn6 or ssk1 null mutation; overexpression increases resistance to farnesol and azoles	0.09
orf19.3161	orf19.3161	Ortholog(s) have ATPase activator activity, RNA binding activity	0.09
orf19.3163	orf19.3163	Ortholog of C. dubliniensis CD36 : Cd36_51910, C. parapsilosis CDC317 : CPAR2_101650, Candida tenuis NRRL Y-1498 : CANTEDRAFT_94797 and Debaryomyces hansenii CBS767 : DEHA2D06578g	0.09
orf19.3166	orf19.3166	Ortholog(s) have role in Golgi to endosome transport, cell morphogenesis, cleistothecium development, conidium formation and endoplasmic reticulum organization, more	0.0895
orf19.3167	orf19.3167	Heme A:farnesyltransferase; catalyzes the 1st step in conversion of protoheme to the heme A prosthetic group required for cytochrome c oxidase activity; Spider biofilm repressed	0.0895
orf19.3168	RPN8	Putative regulatory subunit of the 26S proteasome; mutation confers hypersensitivity to amphotericin B; regulated by Mig1, Gcn2 and Gcn4; Spider biofilm repressed	0.0895
orf19.3169	orf19.3169	Ortholog(s) have role in RNA polymerase II complex localization to nucleus, RNA polymerase III complex localization to nucleus, establishment of mitotic sister chromatid cohesion and cytosol, nucleus localization	0.0895
orf19.317	PNP1	Purine nucleoside phosphorylase; metabolizes inosine and guanosine nucleosides; in the nicotinamide riboside salvage pathway; Spider biofilm repressed	0.08925
orf19.3170	orf19.3170	Ortholog(s) have role in RNA Polymerase I assembly, RNA Polymerase II core complex assembly, RNA Polymerase III assembly, formation of translation preinitiation complex and cytoplasm, cytosolic ribosome localization	0.08925
orf19.3171	ACH1	Acetyl-coA hydrolase; acetate utilization; nonessential; soluble protein in hyphae; antigenic in human; induced on polystyrene adherence; farnesol-, ketoconazole-induced; no human or murine homolog; stationary phase-enriched protein	0.08925
orf19.3172	orf19.3172	Ortholog of C. dubliniensis CD36 : Cd36_51840, Candida tropicalis MYA-3404 : CTRG_05315 and Candida albicans WO-1 : CAWG_04584	0.08925
orf19.3173	orf19.3173	Ortholog(s) have Golgi apparatus, endoplasmic reticulum localization	0.08925
orf19.3174	CDC24	GDP-GTP exchange factor for Cdc42p; phosphorylated; required for maintenance of hyphal growth; misexpression blocks hyphal growth and causes avirulence in a mouse model of systemic infection; antigenic during human oral infection	0.089
orf19.3175	orf19.3175	Putative ortholog of human electron transfer flavoprotein dehydrogenase (ETF-dH); alkaline repressed; repressed by nitric oxide; virulence-group-correlated expression; Spider biofilm induced	0.089
orf19.3176	RIM21	Plasma membrane pH-sensor involved in the Rim101 pH response pathway; required for processing and activation of Rim101 and for alkaline pH-induced hyphal growth; Spider biofilm induced	0.089
orf19.3177	orf19.3177	Ortholog(s) have 2,5-diamino-6-ribitylamino-4(3H)-pyrimidinone 5'-phosphate deaminase activity, pseudouridine synthase activity, role in riboflavin biosynthetic process, tRNA pseudouridine synthesis and cytosol localization	0.089
orf19.3178	orf19.3178	Ortholog(s) have RNA binding activity, role in mRNA splicing, via spliceosome and U2-type prespliceosome localization	0.089
orf19.318	orf19.318	Ortholog(s) have role in iron-sulfur cluster assembly and mitochondrial matrix localization	0.089
orf19.3180	orf19.3180	Ortholog(s) have phosphatidylinositol-4,5-bisphosphate 5-phosphatase activity, role in phosphatidylinositol dephosphorylation and endoplasmic reticulum localization	0.089
orf19.3181.1	orf19.3181.1	Protein of unknown function; involved in secretion of proteins that lack classical secretory signal sequences; Spider biofilm induced	0.0885
orf19.3182	GIS2	Translational activator for mRNAs with internal ribosome entry sites; induced in high iron; repressed by yeast-hypha switch; null exhibits sensitivity to sorbitol, 5-fluorocytosine, and cold temperatures; Spider biofilm repressed	0.0885
orf19.3183	orf19.3183	Protein with a role in insertion of tail-anchored proteins into the ER membrane; required for efficient mating, in shmoo formation and nuclear migration in the pre-zygote of S. cerevisiae; Hap43-repressed	0.08825
orf19.3184	orf19.3184	Ortholog(s) have Golgi apparatus, fungal-type vacuole membrane localization	0.088
orf19.3185	orf19.3185	Ortholog(s) have peptide alpha-N-acetyltransferase activity, role in N-terminal protein amino acid acetylation and NatA complex, cytosolic ribosome, mitochondrion localization	0.088
orf19.3186	orf19.3186	Ortholog of Candida albicans WO-1 : CAWG_04571	0.088
orf19.3187	ZNC1	Zn(2)-Cys(6) transcription factor; regulated by Gcn2 and Gcn4; gene located in zinc cluster region of Chromosome 5, near the MTL locus; required for yeast cell adherence to silicone substrate; Spider biofilm induced	0.088
orf19.3188	TAC1	Zn(2)-Cys(6) transcriptional activator of drug-responsive genes (CDR1 and CDR2); binds DRE element; gene in zinc cluster region near MTL locus; resequencing indicates that TAC1 spans orf19.3188 and orf19.3189; Spider biofilm induced	0.08775
orf19.319	orf19.319	Ortholog of S. cerevisiae : YDR286C, C. glabrata CBS138 : CAGL0H01111g, C. dubliniensis CD36 : Cd36_83160, C. parapsilosis CDC317 : CPAR2_101820 and Candida tenuis NRRL Y-1498 : CANTEDRAFT_113333	0.0875
orf19.3190	HAL9	Putative Zn(II)2Cys6 transcription factor; gene in zinc cluster region of Chr. 5; induced by Mnl1 in weak acid; similar to S. cerevisiae Hal9, a putative transcription factor involved in salt tolerance	0.0875
orf19.3192	STI1	Protein that interacts with Cdc37 and Crk1 in two-hybrid; may be involved in Cdc37 chaperone activity; soluble protein in hyphae; protein in exponential and stationary phase yeast cultures; YNB biofilm induced; Spider biofilm induced	0.08725
orf19.3193	FCR3	bZIP transcription factor; ortholog of S. cerevisiae Yap3; partially complements fluconazole sensitivity of S. cerevisiae pdr1 pdr3; Hap43-induced; required for yeast cell adherence to silicone substrate; flow model biofilm repressed	0.08725
orf19.3195	HIP1	Similar to amino acid permeases; alkaline, flucytosine induced; regulated by Plc1, Gcn2 and Gcn4; fungal-specific; Spider biofilm induced	0.08725
orf19.3196	orf19.3196	Ortholog of Candida albicans WO-1 : CAWG_04564	0.087
orf19.3197	PAP1	Poly(A) polymerase, likely involved in mRNA polyadenylation; PAP is inhibited by parnafungin antifungals; non-sex gene located within the MTLa mating-type-like locus	0.087
orf19.3198	OBPA	Similar to oxysterol binding protein; non-sex gene located within the MTLa mating-type-like locus; Plc1p-regulated	0.08675
orf19.3199	PIKA	Putative phosphatidylinositol kinase; non-sex gene located within the MTLa mating-type-like locus	0.0865
orf19.320	orf19.320	Predicted short chain dehydrogenase; Spider biofilm induced	0.0865
orf19.3200	MTLA2	Master regulator (activator) of a-type mating; has HMG domain, which is predicted to bind DNA; gene has intron; not related to S. cerevisiae MATa2; a/alpha mating type may increase virulence, provides competitive advantage	0.0865
orf19.3201	MTLA1	Homeodomain protein of the MTLa mating type locus; a1 and alpha2 together repress white-opaque switching and mating (an opaque-specific process); a/alpha mating type may increase virulence by competitive advantage; Spider biofilm induced	0.0865
orf19.3202	orf19.3202	Ortholog of C. dubliniensis CD36 : Cd36_51590, C. parapsilosis CDC317 : CPAR2_303610, Candida tenuis NRRL Y-1498 : CANTEDRAFT_135127 and Debaryomyces hansenii CBS767 : DEHA2E19074g	0.0865
orf19.3203	RCY1	Putative F-box protein involved in endocytic membrane traffic and/or recycling; fungal-specific (no human or murine homolog)	0.08625
orf19.3204	orf19.3204	Ortholog of C. dubliniensis CD36 : Cd36_51610, C. parapsilosis CDC317 : CPAR2_303630, Candida tenuis NRRL Y-1498 : CANTEDRAFT_135125 and Debaryomyces hansenii CBS767 : DEHA2E19030g	0.08625
orf19.3205	MPRL36	Mitochondrial ribosomal protein of the large subunit; rat catheter biofilm induced	0.086
orf19.3206	CCT7	Cytosolic chaperonin Cct ring complex; protein is present in exponential and stationary growth phase yeast cultures; sumoylation target	0.08575
orf19.3207	CCN1	G1 cyclin; required for hyphal growth maintenance (not initiation); cell-cycle regulated transcription (G1/S); Cdc28p-Ccn1p initiates Cdc11p S394 phosphorylation on hyphal induction; expression in S. cerevisiae inhibits pheromone response	0.0855
orf19.3208	DAL52	Putative allantoate permease; mutant is viable; similar but not orthologous to S. cerevisiae Dal5	0.0855
orf19.3209	FGR42	Protein lacking an ortholog in S. cerevisiae; transposon mutation affects filamentous growth	0.08525
orf19.321	orf19.321	Ortholog(s) have L-methionine transmembrane transporter activity and role in methionine import	0.08525
orf19.3210	orf19.3210	Predicted protein of unknown function; Plc1-regulated	0.085
orf19.3211	RCF3	Putative heteropentameric replication factor C subunit; transcription is induced upon filamentous growth	0.085
orf19.3212	MID1	Putative stretch-activated Ca2+ channel of the high affinity calcium uptake system; role in thigmotropism; decreased transcription is observed upon fluphenazine treatment or in an azole-resistant strain with CDR1 and CDR2 overexpression	0.085
orf19.3213	orf19.3213	Protein of unknown function; Spider biofilm induced	0.08475
orf19.3214	orf19.3214	Alpha/beta-HydrolasE superfamily protein; membrane-localized	0.08475
orf19.3215	orf19.3215	Putative plasma membrane protein; in S. cerevisiae it is localized to the cell bud and mating projection membrane; repressed by alpha pheromone in SpiderM medium	0.08475
orf19.3216	orf19.3216	Similar to Rab GTPase activators; Hap43p-induced gene	0.08475
orf19.3218	orf19.3218	Putative multidrug resistance protein; upregulated by Efg1p	0.0845
orf19.3219	orf19.3219	Ortholog of S. cerevisiae Sia1; involved in activation of the Pma1 plasma membrane H+-ATPase by glucose in S. cerevisiae; Spider biofilm induced	0.0845
orf19.322	orf19.322	Ortholog of Candida albicans WO-1 : CAWG_02670	0.0845
orf19.3220	orf19.3220	Putative rRNA processing protein; Spider biofilm induced	0.0845
orf19.3221	CPA2	Putative arginine-specific carbamoylphosphate synthetase; protein enriched in stationary phase yeast cultures; rat catheter biofilm induced; Spider biofilm induced	0.0845
orf19.3222	orf19.3222	Predicted vacuolar protein; rat catheter biofilm repressed; flow model biofilm repressed	0.08425
orf19.3223	ATP3	F1-ATP synthase complex subunit; caspofungin repressed; flucytosine and macrophage/pseudohyphal-induced; present in exponential and stationary growth phases; Hap43p-induced gene	0.08425
orf19.3223.1	orf19.3223.1	Putative 12kDa subunit of mitochondrial NADH-ubiquinone oxidoreductase; gene has intron	0.08425
orf19.3225	CWH43	Putative sensor/transporter protein with a predicted role in cell wall biogenesis; possibly an essential gene, disruptants not obtained by UAU1 method; flow model and rat catheter biofilm repressed	0.084
orf19.3226	orf19.3226	Ortholog(s) have role in intracellular sterol transport and extracellular region, fungal-type vacuole lumen localization	0.084
orf19.3227	FTH2	Putative iron transporter; similar to S. cerevisiae Fth1p	0.084
orf19.3228	orf19.3228	Putative endosomal transmembrane protein; Hap43p-induced; mutation confers hypersensitivity to amphotericin B	0.084
orf19.3229	orf19.3229	Protein of unknown function; transcript detected on high-resolution tiling arrays	0.0835
orf19.323	orf19.323	Putative haloacid dehalogenase; localized to plasma membrane	0.0835
orf19.3230	BOI2	Putative SH3-domain-containing protein; mutation confers hypersensitivity to toxic ergosterol analog; Spider biofilm induced	0.0835
orf19.3231	CDC27	Putative ubiquitin-protein ligase; periodic mRNA expression, peak at cell-cycle S/G2 phase	0.0835
orf19.3232	orf19.3232	Putative transporter; mutation confers hypersensitivity to toxic ergosterol analog; fungal-specific (no human or murine homolog)	0.08325
orf19.3233	HSE1	ESCRT-0 complex subunit; SH3-domain-containing protein	0.08325
orf19.3234	OYE22	Putative NADPH dehydrogenase; rat catheter biofilm induced	0.083
orf19.3234.1	SFT1	Putative Golgi v-SNARE; Plc1-regulated; Spider biofilm induced	0.083
orf19.3235	orf19.3235	Putative F-actin capping protein subunit alpha; possibly an essential gene, disruptants not obtained by UAU1 method	0.083
orf19.3237	orf19.3237	Ortholog(s) have cytosol, mitochondrion, nucleus localization	0.083
orf19.3238	orf19.3238	Ortholog of Candida albicans WO-1 : CAWG_01469	0.08275
orf19.3239	CTF18	Protein with a predicted role in sister chromatid cohesion; cell-cycle regulated periodic mRNA expression	0.08275
orf19.3240	ERG27	3-Keto sterol reductase of ergosterol biosynthesis; acts in C-4 sterol demethylation with Erg25p and Erg26p; possible drug target, essential for viability; functional homolog of S. cerevisiae Erg27p	0.08275
orf19.3241	orf19.3241	Ortholog(s) have Seh1-associated complex, extrinsic to fungal-type vacuolar membrane localization	0.08275
orf19.3242	orf19.3242	Putative TFIID and SAGA complex subunit; possibly an essential gene, disruptants not obtained by UAU1 method	0.0825
orf19.3243	SRP54	Putative signal recognition particle (SRP) subunit; induced in ssr1 null; Spider biofilm repressed	0.0825
orf19.3244	orf19.3244	Ortholog(s) have role in mitochondrial respiratory chain complex assembly and mitochondrion localization	0.0825
orf19.3245	orf19.3245	Ortholog of C. dubliniensis CD36 : Cd36_26090, C. parapsilosis CDC317 : CPAR2_801510, Candida tenuis NRRL Y-1498 : CANTEDRAFT_137093 and Debaryomyces hansenii CBS767 : DEHA2F20548g	0.08225
orf19.3247	orf19.3247	Putative ortholog of S. cerevisiae Laa1p; likely to be essential for growth, based on an insertional mutagenesis strategy	0.08225
orf19.3248	orf19.3248	Ortholog of C. dubliniensis CD36 : Cd36_26070, C. parapsilosis CDC317 : CPAR2_803220, Candida tenuis NRRL Y-1498 : CANTEDRAFT_131795 and Debaryomyces hansenii CBS767 : DEHA2E12694g	0.08225
orf19.3249	LAG1	Putative ceramide synthase component; Hap43p-repressed gene; amphotericin B repressed	0.082
orf19.325	orf19.325	Putative mRNA cleavage and polyadenlylation factor; heterozygous null mutant exhibits hypersensitivity to parnafungin and cordycepin in the C. albicans fitness test	0.082
orf19.3250	orf19.3250	Ortholog(s) have RNA binding activity, role in mRNA cis splicing, via spliceosome and U1 snRNP, U2-type prespliceosome localization	0.082
orf19.3251	ARC19	Putative ARP2/3 complex subunit; Hap43-induced gene; mutation confers hypersensitivity to cytochalasin D; rat catheter biofilm repressed	0.082
orf19.3252	DAL81	Zn(II)2Cys6 transcription factor; ortholog of S. cerevisiae Dal81, involved in the regulation of nitrogen-degradation genes; required for yeast cell adherence to silicone substrate; Spider biofilm induced	0.082
orf19.3254	orf19.3254	Ortholog of C. dubliniensis CD36 : Cd36_26020, Candida tropicalis MYA-3404 : CTRG_00984 and Candida albicans WO-1 : CAWG_01455	0.082
[truncated: 4,112 more rows]
